# Supplementary material for: KIF2A regulates the development of dentate granule cells and postnatal hippocampal wiring
Source: eLife. 2018 Jan 9;7:e30935. doi: 10.7554/eLife.30935 (PMC5811213; doi:10.7554/eLife.30935)
Supplement: Figure 1—source data 1. [file elife-30935-fig1-data1.xls]

## Sheet: 1F,1G,1H,raw data
mating no.	sex	no.	genotype	tam	d14	d15	d16	d17	d18	d19	d20	d21	d22	d23	d24	d25	d26	d27	d28	d29	d30	d31	d32	d33	d34	d35	d36	d37	d38	d39	d40	d41	d42	d43	d44	d45	d46	d47	d48	d49	d50	d51	d52	d53	d54	d55	d56	d57	d58
200	f	1	D	+	7.32	7.47	7.64	7.74	8.28	8.58	9.04	10.32	11.66	12.49	12.79	13.23	14.02	13.89	14.43	14.57	13.91	14.43	12.82	13.6
200	m	2	B	+	7.66	7.98	8.19	8.31	8.85	9.37	9.89	10.65	11.66	12.36	12.86	13.09	13.79	14.48	14.85	15.3	16.42	16.89	17.67	18.75
200	m	3	A	+	7.19	7.34	7.35	7.53	8.11	8.73	9.39	10.42	11.81	12.22	12.87	13.3	13.3	14.46	15.16	15.74	16.93	17.89	18.59	20.14
200	f	4	A	+	8.05	8.39	8.3	8.68	9.28	9.63	10.31	10.95	11.62	12.39	13.64	13.86	14.26	15.09	15.14	15.42	15.57	16.4	16.58	17.4
200	f	5	D	+	7.32	7.42	7.48	7.52	7.95	8.1	8.51	9.46	10.56	10.83	11.13	11.24	11.64	11.43	11.47	11.28	9.47	8.65	7352
200	m	6	D	+	7.32	7.56	7.68	7.8	8.26	8.35	8.94	9.83	10.83	11.39	11.83	11.85	11.98	11.63	12.54	11.84	12.38	13.22	13.23	12.99
200	m	7	C	+	8.2	8.55	8.69	9.15	9.66	9.83	10.25	10.81	10.99	11.79	12.53	13.06	13.26	13.97	14.67	15.36	16.63	17.81	18.16	19.23
200	f	8	A	+	7.48	7.68	7.57	7.61	8.22	8.61	9.02	10.28	11.64	12.35	12.58	13.13	13.43	14.41	14.72	15.3	15.19	16.12	16.9
202	f	1	B	+	7.32	7.75	8.01	8.19	8.47	8.59	8.64	8.96	9.74	10.64	10.82	11.59	12.14	12.66	12.93	13.1	13.52	14.38	14.74	15.45	15.74	16.33	16.67	17.26	17.3	17.4
202	f	3	A	+	6.74	7.05	7.25	7.43	7.58	7.48	7.44	7.79	8.36	9.37	9.9	10.63	11.12	11.82	11.65	11.33	11.72	11.78	12.63	13.04	14.1	14.49	14.82	16	16.56	17.11
202	m	4	A	+	7.49	8.05	8.2	8.27	8.68	8.91	9.28	9.48	10.32	11.48	11.84	12.35	13.11	13.55	13.87	14.24	15.38	16.51	17.22	18.33	19.25
202	f	5	D	+	6.38	6.7	6.93	7.05	7.09	7.04	7.13	7.15	7.64	8.28	8.73	0.61	9.83	9.29	10.04	10.48	10.99	10.37	10.33	10.55	9.61	9.93	10.35	9.9	9.21	9.09
202	f	6	C	+	7.16	7.8	7.85	7.99	8.27	8.38	8.61	9.13	10.05	11.1	11.52	12.76	13.43	14.11	14.43	14.63	15.18	15.92	16.39	17.01	17.45	17.73	17.97	18.56	18.37	18.41
202	m	8	D	+	6.83	7.21	7.49	7.59	7.79	7.83	7.98	8.19	8.69	9.41	9.82	40.51	10.89	11.44	11.06	10.57	10.42	9.78	8.78	7.56
211	m	1	D	+	7.15	7.81	8.12	8.18	8.23	8.09	8.43	9.24	9.68	10.6	10.71	11.53	11.56	10.98	10.08	9.44	10.04	10.08	9.88	9.72	10.55	10.62	11.49	9.53
211	m	3	C	+	7.29	7.85	8.34	8.52	8.74	9.21	9.82	11.2	11.86	12.94	13.6	14.21	15.47	15.93	16.22	16.3	16.97	18.18	18.51	19.35	19.96	20.8	20.63	21.91	22.23	22.3	22.42	22.18	22.03
211	m	5	D	+	7.06	7.65	8.03	7.85	7.88	8.02	8.66	9.54	10.29	11.11	11.19	12.01	12.87	13	14.17	14.5	15.37	16.55	17.39	17.65	18.81	19.04	18.91	20.28	21.66	20.58	20.54	20.34	20.58
211	m	7	D	-	6.21	6.93	7.17	7.24	7.22	7.44	8.07	9.27	9.69	10.78	11.9	12.85	13.95	14.91	15.73	16.1	17.27	18.48	19.07	19.56	20.47	20.69	10.97	21.26	21.71	22.34	22.67	22.34	22.77
212	f	1	D	+	7.55	7.61	7.77	7.79	7.83	8.04	8.82	9.81	10.63	11.58	12.08	12.05	12.36	12.75	11.79	11.36	10.82	10.28	10.68	11.14	10.96	11.57	11.77	11.27	10.77	9.64	9.48	9.37
212	f	2	B	+	7.76	7.95	8.19	8.21	8.64	8.96	9.75	10.68	11.16	11.73	12.65	13.26	13.58	14.5	14.42	14.89	14.81	15.82	16.96	17.3	18.16	17.96	18.58	19.06	18.94	19.42	19.29	19.7
212	f	3	C	+	7.51	7.55	7.77	7.74	8.08	8.19	9.05	9.77	10.36	11.25	11.98	12.35	12.98	14.04	13.94	14.12	14.48	15.6	15.98	16.52	17.06	16.86	17.17	17.45	17.72	17.7	17.81	17.89
212	f	5	D	-	7.39	7.43	7.57	7.63	7.86	8.46	9.54	10.31	11.18	11.68	12.66	13.71	13.94	14.86	15.29	15.56	16.11	16.82	17.45	17.81	18.1	18.16	18.28	18.9	18.75	19.4	19.11	19.05
212	m	6	D	+	7.23	7.32	7.26	7.27	7.47	7.76	8.21	9.21	9.9	10.58	11.41	11.64	12.03	12.69	12.81	12.54	12.2	11.79	10.89	9.83	9.02
212	m	7	D	-	7.59	7.83	7.9	8.01	8.19	8.57	10.03	10.91	11.45	12.72	13.84	14.91	15.9	16.83	17.91	18.58	19.37	21.15	21.56	22.4	23.28
201	f	1	A	+	7.02	7.89	8.19	8.29	8.1	8.19	8.47	9.23	9.71	10.77	11.83	12.48	13.55	14.51	14.45	14.51	15.64	16.51	17.49	18.1	17.94	18.24	19.36	19.66
201	f	2	D	+	7.03	7.99	8.48	8.45	8.35	8.24	8.14	8.41	8.8	9.52	10.64	11.36	11.86	11.12	11.4	11.29	11.38	10.72	11.64	12.1	11.26	10.96	11	8.94
201	f	5	C	+	7.27	8.23	9.02	9.08	9.05	8.95	9.58	10.1	10.83	11.56	12.62	13.46	13.94	15.2	5	15.19	15.66	16.93	17.67	18.47	18.08	18.21	19.04	19.18
207	m	1	D	+	7.07	7.62	7.74	7.85	7.98	8.05	8.63	9.16	10.41	11	11.82	12.08	12.4	10.87	9.96	9.21	8.46	7.61
207	f	2	D	+	6.93	7.44	7.56	7.56	7.88	8.12	8.51	9.09	10.16	11.13	11.79	12.34	12.7	12.12	12.15	11.79	10.58	10.63
207	m	3	D	-	6.83	7.24	7.54	7.74	7.82	8.26	8.81	9.45	11.02	11.76	12.89	13.57	14.5	15.1	16.11	17.04	18.09	19.13			21.33	21.51	21.92	22.5	22.75	22.22	22.52	23.06	22.8
207	m	4	B	+	7.15	7.59	7.78	7.93	8.16	8.31	8.83	9.59	10.58	11.69	12.81	13.66	14.16	14.72	16.11	16.05	16.82	17.48			20.33	20.99	20.91	20.56	20.7	20.38	20.07	20.55	20.48
207	m	7	C	+	7.76	8.25	8.49	8.72	8.81	8.9	9.5	10.4	11.28	12.25	13.29	13.9	14.33	14.8	14.96	15.95	16.25	17.46			20.06	20.78	21.43	21.37	21.77	22.4	22.4	23.03	22.74
207	f	9	D	-	6.89	7.17	7.51	7.62	7.79	8.2	8.95	9.92	11.2	11.71	12.71	13.84	14.71	15.01	15.49	15.94	16.41	17.49			16.24	16.82	16.23	16.16	16.01	16.4	15.97	16.8	17.21
208	f	2	B	+	7.3	7.86	8	8.09	8.12	8.48	8.84	9.58	10.22	10.86	11.56	12.45	13.27	13.16	13.61	13.79	13.76	14.97
208	f	3	D	+	6.33	6.79	6.84	6.86	6.75	6.87	7	7.79	8.06	8.71	9.27	10.33	11.03	10.77	9.79	9.24	8.28	7.37
208	m	4	D	+	6.66	7.11	7.18	7.17	7.14	7.15	7.19	7.46	7.76	8.1	8.82	9.86	9.76	11.07	9.41	8.59	7.74	7.02			16.91	17.22	17.06	17.86	17.8	18.05	17.57	17.78	18.14
208	f	6	D	-	6.3	6.85	7.04	7.13	7.08	7.26	7.8	8.63	9.32	9.87	10.33	11.65	12.31	13.02	13.42	13.75	14.15	14.93
208	m	7	B	+	8.46	8.87	9.2	9.46	9.52	10.16	10.51	11.13	12.28	12.76	13.5	14.38	15.13	15.53	15.87	16.07	16.48	17.29
199	m	2	D	+	6.35	6.33	6.74	6.91	7.05	7.14	6.96	6.94	7.26	8.07	8.62	10.19	10.06	9.84	9.22	8.13	7.6	6.46
199	m	3	D	-	6.22	6.23	6.56	6.97	7.22	7.44	7.97	8.23	8.62	9.53	10.22	11.89	12.24	13.68	14.06	14.96	15.84	16.77	17.8
199	m	4	A	+	6.18	6.27	6.58	6.73	6.96	7.03	7.36	7.26	7.9	8.64	9.42	10.62	11.26	12.44	12.23	12.72	13.38	14.57	15.51
205	f	1	D	+	6.93	7.14	7.14	7.02	7.05	7	6.97	7.23	8.27	8.86	10.12	10.56	10.47	11.06	11.4	10.97	10.6	8.91	7.85	6.94
205	f	3	B	+	7.36	7.6	7.67	7.78	7.95	8.26	8.49	9.29	10.07	10.92	11.8	12.32	13.13	13.76	14.03	14.23	14.5	15.09	15.84	15.91	16.16	16.18	16	16.45	16.16	16.54	16	16.62
205	f	5	C	+	6.93	7.18	7.28	7.24	7.64	7.66	8.24	8.82	9.67	10.42	11.34	11.9	12.81	13.07	13.02	13.4	13.66	14.64	14.83	15.23	15.63	16.23	16.6	16.85	17.08	17.39	17.41	17.76
205	f	6	B	+	7.07	7.37	7.42	7.44	7.69	7.68	7.94	8.23	8.97	9.82	10.55	10.85	11.36	12.12	12.4	12.75	13.21	14.26	15.01	15.06	15.33	8.15	9.38	9.44	9.72	10.41	9.77	9.7
205	f	7	D	+	6.5	6.61	6.71	6.78	6.84	6.97	7.06	7.39	8.33	9.12	10.23	10.45	10.96	11.35	11.49	10.97	10.18	9.57	9.21	8.51	9.23
205	f	8	C	+	6.95	7.21	7.25	7.19	7.57	7.51	7.84	8.77	9.82	10.16	11.42	12.03	12.71	13.42	13.66	13.97	14.18	15.41	16.12	16.43	16.61
210	f	1	B	+	6,52	6.67	6.77	6.7	6.93	7.44	7.66	8.84	9.56	10.27	11.03	11.79	12.51	12.7	13.01	13.39	13.71	14.44	14.78	15.46	15.84	16.19	16.97	17	17.4
210	f	2	D	+	5.76	5.91	6.01	5.78	6.07	6.34	6.36	6.57	7.22	7.97	9.1	9.37	9.59	9.37	9.41	10.27	9.66	9.82	9.65	10.31	10.7	10.88	10.91	10.91	11.51
210	f	3	D	+	6.3	6.4	6.39	6.32	6.76	7.29	7.72	8.8	9.45	10.42	10.99	11.67	12.1	12.92	12.91	13.7	13.83	14.49	15.03	15.78	15.97	16.47	16.99	16.51	17
210	f	4	D	-	5.8	6.06	6.19	6.17	6.62	7.26	7.66	8.73	9.56	10.33	10.95	11.73	12.46	12.91	13.3	14.23	14.41	14.9	15.33	15.49	15.66	15.65	15.77	15.43	16.02
210	f	7	D	-	6.03	6.2	6.31	6.29	6.43	6.62	7.23	8.25	8.83	9.64	10.86	11.53	12.45	12.65	13.63	14.41	15.05	15.25	16.16	16.32	16.8	16.94	17.55	16.96	17.09
206	f	1	A	+	7.05	7.39	7.35	7.17	7.26	7.26	7.14	7.38	8.24	9.35	10.15	11.28	11.59	12.16	12.21	12.73	12.86	13.57	14.52	14.92	15.63	15.91	16.12	16.88	17.3
206	m	2	D	+	7.15	7.62	7.62	7.46	7.76	7.59	7.61	7.98	8.82	9.7	10.69	11.29	11.63	12.04	12.32	13.75	13.13	12.23	11.81	12.21	12.1	11.02	10.51
206	m	3	A	+	7.01	7.31	7.3	7.11	7.26	7.34	7.123	8.05	9.16	9.37	10.89	11.59	12.1	12.65	12.71	13.48	13.65	14.37	15.46	16.58	17.07	17.4	18.32
206	f	4	D	+	6.73	6.99	6.89	6.92	6.91	6.98	6.9	7.33	8.24	8.88	9.65	10.38	11.2	11.85	11.56	10.51	9.77	9.3	8.16
206	f	5	D	-	6.85	7.12	7.15	7.11	7.45	7.75	8.01	8.96	9.99	10.49	11.46	12.24	12.83	13.63	13.92	14.33	14.38	15.2	15.84	16.09	16.43	16.69	17.16	17.48	17.61
206	m	6	C	+	7.29	7.45	7.67	7.65	7.95	8.06	8.41	9.32	10.23	10.78	11.32	11.74	12.11	12.51	13.47	13.93	14.42	15.63	16.63	17.62	18.45	19.39	19.41
206	f	7	C	+	7.05	7.38	7.5	7.71	8.03	8.29	8.42	9.52	10.81	11.58	12.29	12.87	13.12	13.81	13.86	14.25	14.6	15.02	15.8	16.28	16.37	16.79	17.12	17.81	17.94
206	m	9	B	+	7.23	7.52	7.81	7.72	7.94	8.35	8.41	9.29	10.21	11.06	12.05	12.93	13	14.2	14.64	15.23	15.5	16.69	17.6	18.57	19.6	20.33	20.86
[truncated: 2 more columns]

## Sheet: sorted data
mating no.	sex	no.	genotype	tam	d14	d16	d18	d20	d22	d24	d26	d28	d30	d32	d34	d36	d38	d40	d42
200	m	3	A	+	7.19	7.35	8.11	9.39	11.81	12.87	13.3	15.16	16.93	18.59
200	f	4	A	+	8.05	8.3	9.28	10.31	11.62	13.64	14.26	15.14	15.57	16.58
200	f	8	A	+	7.48	7.57	8.22	9.02	11.64	12.58	13.43	14.72	15.19	16.9
202	f	3	A	+	6.74	7.25	7.58	7.44	8.36	9.9	11.12	11.65	11.72	12.63	14.1	14.82	16.56
202	m	4	A	+	7.49	8.2	8.68	9.28	10.32	11.84	13.11	13.87	15.38	17.22	19.25
201	f	1	A	+	7.02	8.19	8.1	8.47	9.71	11.83	13.55	14.45	15.64	17.49	17.94	19.36
199	m	4	A	+	6.18	6.58	6.96	7.36	7.9	9.42	11.26	12.23	13.38	15.51
206	f	1	A	+	7.05	7.35	7.26	7.14	8.24	10.15	11.59	12.21	12.86	14.52	15.63	16.12	17.3
206	m	3	A	+	7.01	7.3	7.26	7.123	9.16	10.89	12.1	12.71	13.65	15.46	17.07	18.32
200	m	2	B	+	7.66	8.19	8.85	9.89	11.66	12.86	13.79	14.85	16.42	17.67
202	f	1	B	+	7.32	8.01	8.47	8.64	9.74	10.82	12.14	12.93	13.52	14.74	15.74	16.67	17.3
212	f	2	B	+	7.76	8.19	8.64	9.75	11.16	12.65	13.58	14.42	14.81	16.96	18.16	18.58	18.94	19.29
207	m	4	B	+	7.15	7.78	8.16	8.83	10.58	12.81	14.16	16.11	16.82		20.33	20.91	20.7	20.07	20.48
208	f	2	B	+	7.3	8	8.12	8.84	10.22	11.56	13.27	13.61	13.76
208	m	7	B	+	8.46	9.2	9.52	10.51	12.28	13.5	15.13	15.87	16.48
205	f	3	B	+	7.36	7.67	7.95	8.49	10.07	11.8	13.13	14.03	14.5	15.84	16.16	16	16.16	16
205	f	6	B	+	7.07	7.42	7.69	7.94	8.97	10.55	11.36	12.4	13.21	15.01	15.33	9.38	9.72	9.77
210	f	1	B	+	6,52	6.77	6.93	7.66	9.56	11.03	12.51	13.01	13.71	14.78	15.84	16.97	17.4
206	m	9	B	+	7.23	7.81	7.94	8.41	10.21	12.05	13	14.64	15.5	17.6	19.6	20.86
200	m	7	C	+	8.2	8.69	9.66	10.25	10.99	12.53	13.26	14.67	16.63	18.16
202	f	6	C	+	7.16	7.85	8.27	8.61	10.05	11.52	13.43	14.43	15.18	16.39	17.45	17.97	18.37
211	m	3	C	+	7.29	8.34	8.74	9.82	11.86	13.6	15.47	16.22	16.97	18.51	19.96	20.63	22.23	22.42	22.03
212	f	3	C	+	7.51	7.77	8.08	9.05	10.36	11.98	12.98	13.94	14.48	15.98	17.06	17.17	17.72	17.81
201	f	5	C	+	7.27	9.02	9.05	9.58	10.83	12.62	13.94	5	15.66	17.67	18.08	19.04
207	m	7	C	+	7.76	8.49	8.81	9.5	11.28	13.29	14.33	14.96	16.25		20.06	21.43	21.77	22.4	22.74
205	f	5	C	+	6.93	7.28	7.64	8.24	9.67	11.34	12.81	13.02	13.66	14.83	15.63	16.6	17.08	17.41
205	f	8	C	+	6.95	7.25	7.57	7.84	9.82	11.42	12.71	13.66	14.18	16.12	16.61
206	m	6	C	+	7.29	7.67	7.95	8.41	10.23	11.32	12.11	13.47	14.42	16.63	18.45	19.41
206	f	7	C	+	7.05	7.5	8.03	8.42	10.81	12.29	13.12	13.86	14.6	15.8	16.37	17.12	17.94
200	f	1	D	+	7.32	7.64	8.28	9.04	11.66	12.79	14.02	14.43	13.91	12.82
200	f	5	D	+	7.32	7.48	7.95	8.51	10.56	11.13	11.64	11.47	9.47	7.52
200	m	6	D	+	7.32	7.68	8.26	8.94	10.83	11.83	11.98	12.54	12.38	13.23
202	f	5	D	+	6.38	6.93	7.09	7.13	7.64	8.73	9.83	10.04	10.99	10.33	9.61	10.35	9.21
202	m	8	D	+	6.83	7.49	7.79	7.98	8.69	9.82	10.89	11.06	10.42	8.78
211	m	1	D	+	7.15	8.12	8.23	8.43	9.68	10.71	11.56	10.08	10.04	9.88	10.55	11.49
212	f	1	D	+	7.55	7.77	7.83	8.82	10.63	12.08	12.36	11.79	10.82	10.68	10.96	11.77	10.77	9.48
212	m	6	D	+	7.23	7.26	7.47	8.21	9.9	11.41	12.03	12.81	12.2	10.89	9.02
201	f	2	D	+	7.03	8.48	8.35	8.14	8.8	10.64	11.86	11.4	11.38	11.64	11.26	11
207	m	1	D	+	7.07	7.74	7.98	8.63	10.41	11.82	12.4	9.96	8.46
207	f	2	D	+	6.93	7.56	7.88	8.51	10.16	11.79	12.7	12.15	10.58
208	f	3	D	+	6.33	6.84	6.75	7	8.06	9.27	11.03	9.79	8.28
208	m	4	D	+	6.66	7.18	7.14	7.19	7.76	8.82	9.76	9.41	7.74
199	m	2	D	+	6.35	6.74	7.05	6.96	7.26	8.62	10.06	9.22	7.6
205	f	1	D	+	6.93	7.14	7.05	6.97	8.27	10.12	10.47	11.4	10.6	7.85
205	f	7	D	+	6.5	6.71	6.84	7.06	8.33	10.23	10.96	11.49	10.18	9.21	9.23
210	f	2	D	+	5.76	6.01	6.07	6.36	7.22	9.1	9.59	9.41	9.66	9.65	10.7	10.91	11.51
210	f	3	D	+	6.3	6.39	6.76	7.72	9.45	10.99	12.1	12.91	13.83	15.03	15.97	16.99	17
206	m	2	D	+	7.15	7.62	7.76	7.61	8.82	10.69	11.63	12.32	13.13	11.81	12.1	10.51
206	f	4	D	+	6.73	6.89	6.91	6.9	8.24	9.65	11.2	11.56	9.77	8.16
211	m	7	D	-	6.21	7.17	7.22	8.07	9.69	11.9	13.95	15.73	17.27	19.07	20.47	10.97	21.71	22.67	22.77
212	f	5	D	-	7.39	7.57	7.86	9.54	11.18	12.66	13.94	15.29	16.11	17.45	18.1	18.28	18.75	19.11
212	m	7	D	-	7.59	7.9	8.19	10.03	11.45	13.84	15.9	17.91	19.37	21.56	23.28
207	m	3	D	-	6.83	7.54	7.82	8.81	11.02	12.89	14.5	16.11	18.09		21.33	21.92	22.75	22.52	22.8
207	f	9	D	-	6.89	7.51	7.79	8.95	11.2	12.71	14.71	15.49	16.41		16.24	16.23	16.01	15.97	17.21
208	f	6	D	-	6.3	7.04	7.08	7.8	9.32	10.33	12.31	13.42	14.15		16.91	17.06	17.8	17.57	18.14
199	m	3	D	-	6.22	6.56	7.22	7.97	8.62	10.22	12.24	14.06	15.84	17.8
210	f	4	D	-	5.8	6.19	6.62	7.66	9.56	10.95	12.46	13.3	14.41	15.33	15.66	15.77	16.02
210	f	7	D	-	6.03	6.31	6.43	7.23	8.83	10.86	12.45	13.63	15.05	16.16	16.8	17.55	17.09
206	f	5	D	-	6.85	7.15	7.45	8.01	9.99	11.46	12.83	13.92	14.38	15.84	16.43	17.16	17.61
					14	16	18	20	22	24	26	28	30	32	34	36	38	40	42
				2lox/+. Cre, tam	64.21	68.09	71.45	75.533	88.76	103.12	113.72	122.14	130.32	144.9	83.99	68.62	33.86
				2lox/+, tam	67.31	79.04	82.27	88.96	104.45	119.63	132.07	141.87	148.73	112.6	121.16	119.37	100.22	65.13	20.48
				+/+, tam	73.41	79.86	83.8	89.72	105.9	121.91	134.16	133.23	152.03	150.09	159.67	149.37	115.11	80.04	44.77
				2lox/-, Cre, tam	136.84	145.67	149.44	156.11	182.37	210.24	228.07	225.24	211.44	157.48	99.4	83.02	48.49	9.48
				2lox/-, Cre	66.11	70.94	73.68	84.07	100.86	117.82	135.29	148.86	161.08	123.21	165.22	134.94	147.74	97.84	80.92
					d14	d16	d18	d20	d22	d24	d26	d28	d30	d32	d34	d36	d38	d40	d42
				2lox/+. Cre, tam	9	9	9	9	9	9	9	9	9	9	5	4	2
				2lox/+, tam	10	10	10	10	10	10	10	10	10	7	7	7	6	4	1
				+/+, tam	10	10	10	10	10	10	10	10	10	9	9	8	6	4	2
				2lox/-, Cre, tam	20	20	20	20	20	20	20	20	20	15	9	7	4	1	0
				2lox/-, Cre	10	10	10	10	10	10	10	10	10	7	9	8	8	6	4
					d14	d16	d18	d20	d22	d24	d26	d28	d30	d32	d34	d36	d38	d40	d42
				2lox/+. Cre, tam	7.13444	7.56556	7.93889	8.39256	9.86222	11.4578	12.6356	13.5711	14.48	16.1	16.798	17.155	16.93
				2lox/+, tam	7.47889	7.904	8.227	8.896	10.445	11.963	13.207	14.187	14.873	16.0857	17.3086	17.0529	16.7033	16.2825	20.48
				+/+, tam	7.341	7.986	8.38	8.972	10.59	12.191	13.416	13.323	15.203	16.6767	17.7411	18.6713	19.185	20.01	22.385
				2lox/-, Cre, tam	6.842	7.2835	7.472	7.8055	9.1185	10.512	11.4035	11.262	10.572	10.4987	11.0444	11.86	12.1225	9.48
				2lox/-, Cre	6.611	7.094	7.368	8.407	10.086	11.782	13.529	14.886	16.108	17.6014	18.3578	16.8675	18.4675	19.568	20.23
					d14	d16	d18	d20	d22	d24	d26	d28	d30	d32	d34	d36	d38	d40	d42
				2lox/+. Cre, tam	20	20	20	20	20	20	20	20	20	20	20	20	20	20	20
				2lox/+, tam	20	20	20	20	20	20	20	20	20	20	20	20	20	20	20
				+/+, tam	20	20	20	20	20	20	20	20	20	20	20	20	20	20	20
				2lox/-, Cre, tam	20	20	20	20	20	20	20	20	20	15	9	7	4	1	0
				2lox/-, Cre	20	20	20	20	20	20	20	20	20	20	20	20	20	20	20
				2lox/+. Cre, tam	0.523142	0.566372	0.74924	1.17329	1.56159	1.45398	1.13698	1.38072	1.65798	1.78718	2.00212	2.06096	0.523259	#DIV/0!	#DIV/0!
				2lox/+, tam	0.430565	0.62029	0.701998	0.896787	1.00417	0.984683	1.0632	1.23584	1.3536	1.31027	2.03943	3.91235	3.76509	4.68624	#DIV/0!
				+/+, tam	0.393205	0.613319	0.667915	0.787102	0.68867	0.821509	0.954663	3.06015	1.12502	1.20449	1.54446	1.75544	2.22467	2.7761	0.502046
				2lox/-, Cre, tam	0.457379	0.593139	0.645059	0.814871	1.30258	1.23209	1.11847	1.39573	1.84712	2.13296	2.09882	2.31684	3.39004	#DIV/0!	#DIV/0!
				2lox/-, Cre	0.591973	0.575137	0.564994	0.891254	1.05023	1.21578	1.25824	1.48101	1.72899	2.16907	2.6831	3.03557	2.50831	2.97843	2.97461
												100	100	75	45	35	20	5	0
												100	100	100	100	100	100	100	100

## Sheet: 1H,1I,rawdata2
mating no.	200	200	200	200	200	200	200	200	202	202	202	202	202	202	211	211	211	211	212	212	212	212	212	212	201	201	201	207	207	207	207	207	207	208	208	208	208	208	199	199	199	205	205	205	205	205	205	210	210
sex	f	m	m	f	f	m	m	f	f	f	m	f	f	m	m	m	m	m	f	f	f	f	m	m	f	f	f	m	f	m	m	m	f	f	f	m	f	m	m	m	m	f	f	f	f	f	f	f	f
no.	1	2	3	4	5	6	7	8	1	3	4	5	6	8	1	3	5	7	1	2	3	5	6	7	1	2	5	1	2	3	4	7	9	2	3	4	6	7	2	3	4	1	3	5	6	7	8	1	2
genotype	D	B	A	A	D	D	C	A	B	A	A	D	C	D	D	C	D	D	D	B	C	D	D	D	A	D	C	D	D	D	B	C	D	B	D	D	D	B	D	D	A	D	B	C	B	D	C	B	D
tam	+	+	+	+	+	+	+	+	+	+	+	+	+	+	+	+	+	-	+	+	+	-	+	-	+	+	+	+	+	-	+	+	-	+	+	+	-	+	+	-	+	+	+	+	+	+	+	+	+
date	d32	d32	d32	d32	d32	d32	d32	d32	d32	d32	d32	d32	d32	d32	d32	d32	d32	d32	d32	d32	d32	d32	d32	d32	d32	d32	d32	d32	d32	d32	d32	d32	d32	d32	d32	d32	d32	d32	d32	d32	d32	d32	d32	d32	d32	d32	d32	d32	d32
Time NF	300	300	300	300	300	300	300	300	300	300	300	300	300	300	300	300	300	300	300	300	300	300	300	300	300	300	300	300	300	300	300	300	300	300	300	300	300	300	300	300	300	300	300	300	300	300	300	300	300
Time F	4.6	64	48.5	81	12.2	28.8	83.6	99.2	107.4	37.4	85.7	11.4	27	nd	3.7	46.8	42.6	67.7	59.7	63.2	48.4	40.1	35.2	46.1	62.1	6.3	35.2	23.4	3.5	47.2	89.5	67.8	70.4	108.7	145.3	41	63.9	134.6	0	64.3	31.3	43.9	85	87	41.2	24.1	64.5	101.9	49.5
Path NF	311.1	1552.2	1271.9	1958.3	447.9	796.9	2011.5	2498	2518.2	1004.8	2125.2	536.1	743.1	nd	249.3	1179	1087.3	1684.6	1497.9	1500.4	1295.9	1084.3	1086	1194.6	1540.8	383.3	950.7	710	436.7	1223.1	2094.9	163.4	1717.6	2576.5	3612	1144.2	1553.7	163.9	0	1581.2	859.5	1116.2	2130	2131.7	1162.2	743.2	1516.3	2313.4	1255.6
Path F	75.3	1246.6	966.7	1678.3	197.6	506.2	1697.4	2756.6	2232.3	740.3	1832.3	198.7	523.2	nd	59.6	914.7	855.1	1376.1	1167	1265.6	1044	798.3	584.8	902.4	1312.1	103.1	676.9	402.6	177.1	961.5	1813.4	1419.9	1416.5	2266.8	3349.4	747	1285.1	2929.5	0	1312.3	604.8	827.6	1772.1	880.8	838.9	432.1	1274.9	2040.7	923.4
Right turn	2	17	19	27	5	9	28	38	21	8	26	0	9	nd	1	9	12	10	5	18	14	12	4	11	10	1	8	4	0	13	17	14	21	26	22	4	17	36	0	25	8	10	23	32	7	8	8	26	12
Left turn	1	17	19	28	1	6	31	26	22	19	21	5	8	nd	0	14	11	19	9	12	17	15	9	13	15	2	7	6	0	8	21	15	15	21	25	5	13	33	0	22	8	17	31	19	9	8	14	27	21
crossed	3	96	74	133	17	36	131	161	189	60	149	13	40	nd	2	70	66	109	100	104	75	56	46	71	110	4	56	28	4	73	150	118	117	189	281	65	109	254	0	109	44	71	132	159	65	37	106	169	72
Latency	88.3	1.2	4.2	3	13.1	58.4	1	0.8	3.3	3	0,9	8.4	2.2	nd	58.6	5.9	0.8	0.7	9.2	2.1	2.3	93.1	4.5	3	0.2	3.4	0.7	2	150.1	7.4	3.4	3.2	0.7	2.7	2.9	0.9	1.4	3.5	300	3.2	12.6	3.2	7.6	1.7	2.3	13.9	6.2	2.6	28.3
U	3	11	5	7	0	4	4	6	4	2	6	0	0	nd	0	7	3	1	2	8	5	5	0	3	4	0	8	0	1	4	5	5	0	nd	0	nd	4	nd	nd	3	3	2	4	3	8	0	nd	5	0
Nyou	0	1	0	1	0	0	2	0	0	0	0	0	0	nd	0	0	0	0	1	0	0	0	0	0	1	0	1	0	0	0	0	0	0	nd	0	nd	0	nd	nd	0	0	0	1	0	0	0	nd	0	0
WT(sec)	cKO(sec)	Epilepsy	Epilepsy WT	Epilepsy KO	Epilepsy WT	Epilepsy KO
7.2	67.5	exp01	0	3	0	60
8.4	96.2	exp02	0	2	0	40
9.2	62.6	exp03	0	2	0	40
7	53.9	exp04	0	2	0	40
6.8	82.4	exp05	0	2	0	40
8.8	112.2
8.5	62.1
7.2	79.4
5.9	82.6
9.1	72.9
9.9	73.3
7.6	66.8
8.7	61.1
7.2	102.1
8.2	83.7
6.6	70.1
7.5	65.2
6.2	69
8.8	74.2
7.4	65.8
[truncated: 11 more columns]
