# Supplementary material for: KIF2A regulates the development of dentate granule cells and postnatal hippocampal wiring
Source: eLife. 2018 Jan 9;7:e30935. doi: 10.7554/eLife.30935 (PMC5811213; doi:10.7554/eLife.30935)
Supplement: Figure 2—figure supplement 1—source data 1. [file elife-30935-fig2-figsupp1-data1.xlsx]

## Sheet: data
	WT1	WT2	WT3
	10.023	12.329	11.0234			WT	9.91667	1.62135
	11.532	9.8275	9.1723			cKO	26.9167	3.96481
	13.372	8.3726	8.1294
	8.3852	10.1828	10.8274
	10.828	10.178	9.78813	10.2647	1.63864
	KO1	KO2	KO3
	26.8329	27.9234	23.4232
	24.0213	31.5748	30.6329
	35.7438	25.5375	27.2543
	20.9324	26.2031	29.3429
	26.8826	27.8097	27.6633	27.4519	3.99796
t.test	2.67462e-12
