# Supplementary material for: KIF2A regulates the development of dentate granule cells and postnatal hippocampal wiring
Source: eLife. 2018 Jan 9;7:e30935. doi: 10.7554/eLife.30935 (PMC5811213; doi:10.7554/eLife.30935)
Supplement: Figure 2—source data 1. [file elife-30935-fig2-data1.xls]

## Sheet: Locomotive - WT
Time[sec]	165.228		202.006		315.004		Time[sec]	371.978		424.942		562.042		Time[sec]	625.998		648.54		734.002
	L01	L01	L01	L01	L01	L01	L02	L02	L02	L02	L02	L2	L2	L03	L03	L3	L3	L3	L3	L03
	Power[μV2/Hz]		Power[μV2/Hz]		Power[μV2/Hz]			Power[μV2/Hz]		Power[μV2/Hz]		Power[μV2/Hz]			Power[μV2/Hz]		Power[μV2/Hz]		Power[μV2/Hz]
freq.[Hz]	Cortex	Hippo	Cortex	Hippo	Cortex	Hippo	freq.[Hz]	Cortex	Hippo	Cortex	Hippo	Cortex	Hippo	freq.[Hz]	Cortex	Hippo	Cortex	Hippo	Cortex	Hippo
0	0.000551962	0.0122828	0.000286877	0.011189	0.000584519	0.000205383	0	0.000376209	0.00635348	0.00200724	0.00920655	2.5542e-05	0.0153588	0	0.0115558	0.00586289	4.66436e-05	0.000359928	0.0106352	0.0292475
1.95313	0.0107398	0.0492199	0.00332334	0.0177806	0.102003	0.261862	1.95313	0.00166321	0.0138587	0.00404794	0.0471303	0.00652554	0.013854	1.95313	0.00140745	0.00158745	0.0333439	0.346478	0.029825	0.214496
3.90625	0.0602904	0.354523	0.0380988	0.20987	0.0374354	0.223619	3.90625	0.002157	0.00924973	0.00421749	0.0427255	0.00206096	0.0106139	3.90625	0.00177443	0.0432348	0.0140018	0.0669601	0.0985153	0.25519
5.85938	0.0595992	0.151725	0.0793701	0.288132	0.00545066	0.0121914	5.85938	0.00659857	0.00737446	0.0059282	0.106106	0.00781191	0.111989	5.85938	0.000133399	0.00721937	0.00274224	0.0749262	0.0564301	0.222729
7.8125	0.0918267	0.52435	0.0705762	0.627884	0.0126721	0.0806252	7.8125	0.0185585	0.023972	0.0159635	0.128923	0.00414313	0.413708	7.8125	0.0563609	0.358073	0.00155981	0.197749	0.00948665	0.163129
9.76563	0.0498129	0.213676	0.0199195	0.111211	0.00392767	0.0984241	9.76563	0.00130851	0.0633743	0.0155111	0.223965	0.00698298	0.246351	9.76563	0.0626118	0.131648	0.0342906	0.311077	0.0151406	0.196361
11.7188	0.0547114	0.156763	0.00779984	0.0106211	0.0194593	0.346809	11.7188	0.00228662	0.0095262	0.0713547	0.601087	0.0159663	0.134643	11.7188	0.0183164	0.0785998	0.00705909	0.161723	0.0116019	0.0573116
13.6719	0.00239481	0.0224396	0.00192268	0.0210414	0.00908837	0.0204997	13.6719	6.67604e-06	0.00226003	0.0203835	0.103172	0.0159142	0.0222762	13.6719	0.0142612	0.0874994	0.0150019	0.213101	0.00184833	0.154856
15.625	0.055052	0.0582917	0.00052951	0.0306092	0.024904	0.0349172	15.625	0.019485	0.0383907	0.0161485	0.106208	0.012107	0.0112339	15.625	0.0104486	0.0950117	0.0198756	0.191376	0.0796292	0.0476365
17.5781	0.0132135	0.0446879	0.076241	0.483501	0.00413802	0.00807328	17.5781	0.00751197	0.0428212	0.00653454	0.0692626	0.00791216	0.0641231	17.5781	0.0160054	0.0855165	0.0041587	0.0958526	0.0185094	0.571223
19.5313	0.0266643	0.117136	0.0250428	0.019035	0.00582173	0.105262	19.5313	0.00322146	0.00591338	0.0113377	0.0283587	0.016469	0.0933388	19.5313	0.00022677	0.0231744	0.0361372	0.0106584	0.0712004	0.166195
21.4844	0.00746697	0.0909299	0.0129473	0.0293027	0.0145919	0.0479446	21.4844	0.0347167	0.327653	0.00226497	0.0192944	4.80909e-05	0.00208812	21.4844	0.0114943	0.0951659	0.0103388	0.0436853	0.0320418	0.759431
23.4375	0.0102404	0.0263828	0.000752255	0.00438173	0.061405	0.227022	23.4375	0.00877736	0.036749	0.00174231	0.0309746	0.00792112	0.0037842	23.4375	0.00479399	0.0273622	0.0122273	0.0905547	0.0539548	0.447267
25.3906	0.0111037	0.0138956	0.015198	0.0924508	0.00381088	0.0107369	25.3906	0.00156181	0.238011	0.00129589	0.01696	0.0170822	0.022138	25.3906	0.00121216	0.077816	0.0177644	0.0185753	0.0488117	0.653642
27.3438	0.00902429	0.0525118	0.0027788	0.0360979	0.00188112	0.035043	27.3438	0.00129587	0.0928697	0.000500234	0.00805674	0.00675479	0.00631038	27.3438	0.00248873	0.0349649	0.00195664	0.00178267	0.0145778	0.642676
29.2969	0.00343329	0.0654988	0.00175549	0.0167515	0.00053107	0.0100928	29.2969	0.000559075	0.0573095	0.00820316	0.0149625	0.00245134	0.000866759	29.2969	0.00203979	0.0187898	0.00764881	0.0392135	0.0282389	0.551976
31.25	0.00223477	0.00256743	0.00555757	0.0259404	0.000692112	0.0223134	31.25	0.00324237	0.0186039	0.000682568	0.0209791	0.00655694	0.0156647	31.25	0.0034334	0.0208108	0.00335508	0.00109334	0.0590427	0.655144
33.2031	0.00106565	0.0158825	0.00756236	0.00331783	0.00567892	0.0140133	33.2031	0.000655428	0.00390423	0.00252437	0.00441017	0.00220969	0.00953178	33.2031	0.00528401	0.0070823	0.00106029	0.0483944	0.0394589	0.670655
35.1563	0.00714319	0.00980625	0.000109604	0.000301405	0.00222627	0.00251542	35.1563	0.00204794	0.0212031	0.00140903	0.00152988	0.00285361	0.0228789	35.1563	0.00195939	0.00203667	0.000737479	0.0202869	0.0137942	0.276842
37.1094	0.000972261	0.00119369	0.0161437	0.0168532	0.0273096	0.0404734	37.1094	0.00342008	0.0125133	4.65855e-05	0.004453	0.000102301	0.00118965	37.1094	0.00513247	0.00385857	0.00184647	0.00628511	0.00825387	0.153609
39.0625	0.000259806	0.00237065	0.00754608	0.0245395	0.00152424	0.00399589	39.0625	0.00145215	0.000153265	0.00114086	0.0118034	0.00225968	0.001791	39.0625	0.00646616	0.0226387	0.00191153	0.0262392	0.00383879	0.0926895
41.0156	0.000115369	0.00185481	0.0072496	0.0143257	0.0139945	0.0163195	41.0156	0.000841786	0.000707628	0.00164511	0.0065966	8.68919e-05	0.000555539	41.0156	8.64233e-05	0.00428148	0.000478415	0.00198283	0.000252655	0.0471929
42.9688	0.000204373	0.00284127	0.00054221	0.000772888	0.00158969	0.0030093	42.9688	1.87285e-05	0.0012985	0.00185425	0.00730231	0.00134927	0.0017255	42.9688	0.00341989	0.0102576	0.0026173	0.00665087	0.0045476	0.0619384
44.9219	0.00126076	0.00215045	0.00382097	0.00458699	0.00411852	0.00203756	44.9219	0.000557256	0.000746856	0.000201358	0.000145584	0.000448903	0.00385155	44.9219	0.000705719	0.000219624	0.000906897	0.00570989	0.00481452	0.00541284
46.875	5.37629e-05	0.000829136	0.000430517	0.00167489	0.00540775	0.00525273	46.875	0.00285623	0.00408167	0.0011497	6.93266e-05	0.000859378	0.00480103	46.875	0.000938397	0.0039169	0.00262973	0.00205784	0.00212578	0.00197084
48.8281	0.000117092	7.41937e-05	0.000839992	0.00426831	0.00209112	0.002194	48.8281	0.000477906	0.00114394	0.000865712	0.00187185	0.000133725	9.48453e-05	48.8281	3.35946e-05	0.00173454	0.000918914	0.00282584	3.51966e-05	0.000747539
50.7813	0.000213352	0.000783224	0.00515403	0.00580032	0.00730889	0.00950166	50.7813	0.00428102	0.00733509	0.00021619	0.000187407	0.00111404	0.00433808	50.7813	0.00226536	0.00515743	0.000145059	4.40988e-05	0.00464015	0.00556058
52.7344	2.29533e-05	2.69402e-05	0.00513122	0.0105395	0.00138575	0.000439757	52.7344	0.00183714	0.00268046	0.000329426	0.000706592	9.71057e-06	0.00418159	52.7344	0.0011912	0.00251282	0.000201114	0.00114483	0.00561504	0.0120427
54.6875	0.000401974	0.0012414	0.00374973	0.0107421	0.00651526	0.0078168	54.6875	0.00171829	0.00113235	0.000254111	0.00331901	0.000354768	0.00875578	54.6875	0.000900288	0.00132665	0.000534622	0.00150208	0.00293946	0.0100882
56.6406	0.000855126	0.000740069	0.000433891	0.000903463	3.29839e-05	0.000879072	56.6406	0.000978373	0.00239023	0.000515397	0.00339453	0.000884472	0.00629687	56.6406	0.00307969	0.00497813	0.000696795	0.000930338	0.00280991	0.00990344
Time[sec]
L01					L02					L03
freq.[Hz]	Cortex	Hippo	Cortex SD	Hippo SD	freq.[Hz]	Cortex	Hippo	Cortex SD	Hippo SD	freq.[Hz]	Cortex	Hippo	Cortex SD	Hippo SD
0	0.000474453	0.00789239	0.000163259	0.00667957	0	0.000802997	0.0103063	0.00105754	0.00460228	0	0.00741255	0.0118234	0.00639565	0.0153385
1.95313	0.0386887	0.109621	0.054957	0.132779	1.95313	0.0040789	0.0249477	0.00243131	0.0192107	1.95313	0.0215255	0.18752	0.0175113	0.17402
3.90625	0.0452749	0.262671	0.0130081	0.079843	3.90625	0.00281182	0.020863	0.0012183	0.0189457	3.90625	0.0380972	0.121795	0.0526796	0.116131
5.85938	0.04814	0.150683	0.0382689	0.137973	5.85938	0.00677956	0.0751565	0.000954808	0.0587746	5.85938	0.0197686	0.101625	0.0317766	0.110208
7.8125	0.0583583	0.410953	0.0409673	0.290718	7.8125	0.0128884	0.188868	0.00768394	0.201664	7.8125	0.0224691	0.23965	0.0296175	0.104008
9.76563	0.0245534	0.141104	0.0232909	0.0631738	9.76563	0.0079342	0.177897	0.00714892	0.099809	9.76563	0.0373477	0.213029	0.0238828	0.0908683
11.7188	0.0273235	0.171398	0.0244245	0.168571	11.7188	0.0298692	0.248419	0.0365728	0.311761	11.7188	0.0123258	0.0992115	0.00566346	0.0551731
13.6719	0.00446862	0.0213269	0.00400778	0.00100097	13.6719	0.0121015	0.0425694	0.0107101	0.0534291	13.6719	0.0103705	0.151819	0.00738968	0.0628559
15.625	0.0268285	0.0412727	0.0273121	0.0148955	15.625	0.0159135	0.0519442	0.00369461	0.0489162	15.625	0.0366511	0.111341	0.0375174	0.0732479
17.5781	0.0311975	0.178754	0.0392719	0.264553	17.5781	0.00731956	0.0587356	0.000708679	0.0140198	17.5781	0.0128912	0.250864	0.00766547	0.277487
19.5313	0.0191763	0.0804777	0.0115938	0.0535411	19.5313	0.0103427	0.042537	0.00667958	0.0454045	19.5313	0.0358548	0.0666759	0.0354877	0.0864129
21.4844	0.0116687	0.0560591	0.00373058	0.0316048	21.4844	0.0123433	0.116345	0.0194077	0.1832	21.4844	0.0179583	0.299427	0.0122103	0.399206
23.4375	0.0241326	0.0859288	0.0326256	0.122684	23.4375	0.00614693	0.0238359	0.00383846	0.0176037	23.4375	0.0236587	0.188395	0.0264991	0.226406
25.3906	0.0100375	0.0390278	0.00576794	0.0462927	25.3906	0.00664663	0.0923697	0.00903844	0.126156	25.3906	0.0225961	0.250011	0.0241648	0.350807
27.3438	0.0045614	0.0412176	0.00389095	0.0097953	27.3438	0.0028503	0.0357456	0.00340471	0.0494786	27.3438	0.00634106	0.226475	0.00713819	0.360823
29.2969	0.00190662	0.030781	0.001457	0.0302502	29.2969	0.00373786	0.0243796	0.00398112	0.0293761	29.2969	0.0126425	0.203326	0.013795	0.302112
31.25	0.00282815	0.0169404	0.00248641	0.0125788	31.25	0.00349396	0.0184159	0.00294526	0.00266218	31.25	0.0219437	0.225683	0.0321287	0.372055
33.2031	0.00476898	0.0110712	0.00334258	0.00677935	33.2031	0.0017965	0.00594873	0.00100064	0.00311331	33.2031	0.0152677	0.242044	0.0210563	0.371762
35.1563	0.00315969	0.00420769	0.0036085	0.00497326	35.1563	0.00210353	0.015204	0.000723892	0.0118717	35.1563	0.00549702	0.0997219	0.00721149	0.153662
37.1094	0.0148085	0.0195068	0.0132193	0.0197738	37.1094	0.00118966	0.00605198	0.00193181	0.00582871	37.1094	0.0050776	0.0545842	0.00320405	0.0857666
39.0625	0.00311004	0.010302	0.00389339	0.0123568	39.0625	0.00161756	0.00458255	0.000577461	0.00630682	39.0625	0.00407216	0.0471891	0.00228627	0.0394456
41.0156	0.00711982	0.0108333	0.00694048	0.00783928	41.0156	0.000857929	0.00261992	0.000779234	0.00344474	41.0156	0.000272498	0.0178191	0.000196748	0.0254644
42.9688	0.000778758	0.00220782	0.000722317	0.00124552	42.9688	0.00107408	0.0034421	0.000948199	0.00334985	42.9688	0.00352826	0.0262823	0.000969703	0.0309317
44.9219	0.00306675	0.002925	0.00157109	0.00144043	44.9219	0.000402506	0.00158133	0.000182429	0.00198892	44.9219	0.00214238	0.00378078	0.00231633	0.00308763
46.875	0.00196401	0.00258559	0.00298831	0.00234821	46.875	0.00162177	0.00298401	0.00107888	0.00254969	46.875	0.00189797	0.00264853	0.000868375	0.0010993
48.8281	0.00101607	0.00217883	0.000998724	0.0020971	48.8281	0.000492448	0.00103688	0.00036621	0.000893327	48.8281	0.000329235	0.00176931	0.000510678	0.00103959
50.7813	0.00422542	0.00536173	0.00363777	0.00437573	50.7813	0.00187042	0.00395353	0.00213537	0.00358933	50.7813	0.00235019	0.00358737	0.00224875	0.00307518
52.7344	0.00217997	0.00366873	0.00264513	0.00595384	52.7344	0.000725426	0.00252288	0.000975954	0.00174285	52.7344	0.00233578	0.00523345	0.00288274	0.00593652
54.6875	0.00355565	0.0066001	0.00306126	0.00486581	54.6875	0.000775723	0.00440238	0.000817837	0.00392549	54.6875	0.00145812	0.00430564	0.00129584	0.00500861
56.6406	0.000440667	0.000840868	0.000411113	8.81423e-05	56.6406	0.000792747	0.00402721	0.000244738	0.00202871	56.6406	0.00219547	0.00527064	0.00130488	0.0044937
WTL
freq.[Hz]	WTCortex	WTHippo	Cortex SE	Hippo SE
0	0.00289667	0.0100074	0.000714653	0.000361952
1.95313	0.021431	0.107363	0.00315946	0.0148451
3.90625	0.028728	0.13511	0.00414976	0.0221741
5.85938	0.024896	0.109155	0.00386173	0.00699662
7.8125	0.0312386	0.279824	0.00437629	0.0212453
9.76563	0.0232784	0.177343	0.00269263	0.0065664
11.7188	0.0231728	0.173009	0.00173074	0.0136231
13.6719	0.00898019	0.071905	0.000730633	0.0127834
15.625	0.0264644	0.0681861	0.00189395	0.00689264
17.5781	0.0171361	0.162785	0.00228074	0.0177197
19.5313	0.0217913	0.0632302	0.00236534	0.00350609
21.4844	0.0139901	0.157277	0.000630443	0.0231399
23.4375	0.0179794	0.0993865	0.00187138	0.015172
25.3906	0.0130934	0.127136	0.00153406	0.0200292
27.3438	0.00458425	0.101146	0.000318682	0.0198225
29.2969	0.00609566	0.0861624	0.00104856	0.0185345
31.25	0.00942195	0.087013	0.0019808	0.021926
33.2031	0.00727774	0.0863546	0.00129214	0.0246211
35.1563	0.00358675	0.0397112	0.000317056	0.00954147
37.1094	0.00702526	0.0267143	0.0012808	0.00457459
39.0625	0.00293326	0.0206912	0.00022581	0.00422209
41.0156	0.00275008	0.0104241	0.00069298	0.00138899
42.9688	0.0017937	0.0106441	0.00027558	0.00247519
44.9219	0.00187054	0.00276237	0.00024698	0.000202422
46.875	0.00182792	0.00273937	3.31475e-05	3.91046e-05
48.8281	0.000612584	0.00166167	6.55132e-05	0.000105626
50.7813	0.00281534	0.00430088	0.000227214	0.000171034
52.7344	0.00174706	0.00380835	0.00016216	0.000248423
54.6875	0.00192983	0.00510271	0.000264505	0.000236923
56.6406	0.00114296	0.00337957	0.000169491	0.000417145

## Sheet: Locomotive - KO
Time[sec]	1145	Time[sec]	1155.02		1170		Time[sec]	1220	Time[sec]	1229.99	Time[sec]	1240		Time[sec]	1290.01	Time[sec]	1300	Time[sec]	1309.99
	L01	L01	L01	L01	L01	L01		L02		L02		L2	L2		L03		L3		L3	L03
	Power[μV2/Hz]		Power[μV2/Hz]		Power[μV2/Hz]			Power[μV2/Hz]		Power[μV2/Hz]		Power[μV2/Hz]			Power[μV2/Hz]		Power[μV2/Hz]		Power[μV2/Hz]
freq.[Hz]	Cortex	Hippo	Cortex	Hippo	Cortex	Hippo	freq.[Hz]	Cortex	Hippo	Cortex	Hippo	Cortex	Hippo	freq.[Hz]	Cortex	Hippo	Cortex	Hippo	Cortex	Hippo
0	0.032018	0.0135545	0.0144812	0.0144918	0.00389659	0.0501042	0	0.0258467	0.0391672	0.0124536	0.000359928	0.0765072	0.0626592	0	0.0810303	0.0669673	0.0226988	0.0234098	0.000577933	0.00960362
1.95313	0.541154	0.484151	0.0429787	0.0376627	0.0422467	0.306125	1.95313	0.576054	0.598779	0.0682244	0.105736	0.0201775	0.0236159	1.95313	0.0948914	0.032548	0.0578963	0.164148	0.111505	0.033173
3.90625	0.602236	0.655796	0.0104018	0.0914997	0.0768696	0.236554	3.90625	0.474655	0.441541	0.308384	0.547971	0.491048	1.25448	3.90625	0.0840339	0.141433	0.639057	1.23205	0.0451485	0.293413
5.85938	0.175414	0.492283	0.562129	0.246532	0.117273	0.558903	5.85938	0.167485	0.717195	0.384946	1.57994	0.434442	0.0558163	5.85938	0.132099	0.727572	0.671659	1.15113	0.562932	2.42136
7.8125	0.599766	0.548067	0.179029	0.0256939	0.53771	0.273406	7.8125	0.0584649	0.298387	0.303897	0.746615	1.03779	1.40318	7.8125	0.198434	0.0527533	1.62941	2.49865	0.101811	0.154825
9.76563	0.0398323	0.149117	0.124755	0.137173	0.0302391	0.0453681	9.76563	0.159544	0.0813495	0.0238771	0.161997	0.136301	0.115869	9.76563	0.327811	0.703944	0.265068	0.399852	0.0126063	0.190978
11.7188	0.113923	0.216393	0.109684	0.14971	0.203044	0.666569	11.7188	0.0200476	0.0789154	0.0386858	0.0942718	0.0850297	0.516165	11.7188	0.185345	0.0502084	0.00748003	0.104782	0.343918	0.613095
13.6719	0.171993	0.119192	0.27866	0.258843	0.153655	0.152062	13.6719	0.177274	0.18806	0.0514887	0.0218324	0.215376	0.169525	13.6719	0.0244657	0.23018	0.670601	0.582055	0.0711508	0.244642
15.625	0.410245	0.387074	0.0442065	0.22278	0.0704607	0.0434508	15.625	0.172154	0.242927	0.0437731	0.0367774	0.00275527	0.122979	15.625	0.0594914	0.0166406	0.735294	0.432099	0.143567	0.605485
17.5781	0.469356	0.546223	0.056255	0.251716	0.384137	0.558316	17.5781	0.0430768	0.230024	0.0332121	0.0181626	0.0265736	0.258701	17.5781	0.0248141	0.237309	0.487424	0.631202	0.211845	0.209691
19.5313	0.114409	0.193849	0.429971	0.634632	0.0440486	0.130864	19.5313	0.111011	0.179456	0.435258	0.609568	0.568224	0.634241	19.5313	0.234229	0.215247	0.144493	0.353857	0.00573446	0.153964
21.4844	0.314177	0.523559	0.0530458	0.116472	0.0765356	0.105818	21.4844	0.119056	0.251109	0.0202697	0.103495	0.00567317	0.0101178	21.4844	0.0160386	0.0172261	0.123924	0.237807	0.0740085	0.0734413
23.4375	0.214045	0.397603	0.00453187	0.0700264	0.0211183	0.0819516	23.4375	0.00337937	0.00581162	0.0368341	0.0762275	0.152587	0.20078	23.4375	0.0693759	0.184085	0.0144724	0.0476507	0.0713814	0.102562
25.3906	0.104763	0.153008	0.00118701	0.00595699	0.0431418	0.0667375	25.3906	0.0575047	0.137766	0.0702257	0.142814	0.0960099	0.311225	25.3906	0.223632	0.229128	0.206374	0.479109	0.115905	0.106439
27.3438	0.348088	0.38125	0.0159111	0.0217514	0.0247703	0.0486082	27.3438	0.0436972	0.0886847	0.0124317	0.00724762	0.161475	0.270231	27.3438	0.052041	0.0771117	0.00722379	0.0729952	0.0315631	0.116204
29.2969	0.0856322	0.115045	0.033568	0.112156	0.00597523	0.0400572	29.2969	0.0608849	0.103384	0.00018777	0.0219659	0.00976046	0.00448461	29.2969	0.0395748	0.0374664	0.0410703	0.112333	0.0288206	0.06405
31.25	0.0784257	0.112942	0.0137118	0.0145512	0.228543	0.164351	31.25	0.0300263	0.0432371	0.0151509	0.056844	0.00532249	0.0145119	31.25	0.0299047	0.0351638	0.0395679	0.119381	0.0120406	0.00357237
33.2031	0.0481502	0.0747605	0.0568173	0.0497706	0.0173326	0.0268856	33.2031	0.010951	0.000311436	0.0834551	0.217432	0.000239793	0.0168121	33.2031	0.00816756	0.0176262	0.0667205	0.0522929	0.0514548	0.103835
35.1563	0.0284664	0.0107304	0.00238934	0.00420798	0.0319142	0.10062	35.1563	0.0187595	0.00194293	0.104287	0.214031	0.000335843	0.00485963	35.1563	0.101191	0.0860506	0.0307882	0.0235751	0.00776067	0.0151582
37.1094	0.0311511	0.0269386	0.0104077	0.000932225	0.0409716	0.0397389	37.1094	0.00128214	0.01512	0.0986252	0.124603	0.00368051	0.00493223	37.1094	0.0110443	0.0183479	0.0624421	0.0358481	4.73347e-06	0.000721734
39.0625	0.00803725	0.00336415	0.00924319	0.0188022	0.00142235	0.00138958	39.0625	0.031509	0.036788	0.0858543	0.0297106	0.013745	0.0278717	39.0625	0.0126883	0.0271749	0.0345754	0.02323	0.0168828	0.00996763
41.0156	0.0163835	0.0343853	0.00694085	0.00944453	0.00783524	0.0152243	41.0156	0.00462243	0.0123815	0.00629798	0.000568572	0.000854693	0.00412781	41.0156	0.0190465	0.0223066	0.0213052	0.0100239	0.0318597	0.0546605
42.9688	0.0281187	0.0381071	0.00147684	0.00754248	0.00962491	0.015496	42.9688	0.00946601	0.00800977	0.00130112	0.00138296	0.00761562	0.00804471	42.9688	0.00392581	0.00355936	0.0247075	0.0208208	0.0141848	0.00443805
44.9219	0.00674913	0.000230568	0.00041036	0.00208737	0.00408944	0.00427722	44.9219	0.000518304	0.000539146	0.00362057	0.0112209	0.00229099	0.00346637	44.9219	0.0590897	0.0655056	0.0162417	0.0121113	0.04769	0.0646137
46.875	0.0388337	0.054887	0.00527082	0.00866934	0.000550291	0.0014036	46.875	0.00208458	0.00272288	0.00845097	0.016434	0.00082081	0.00010614	46.875	0.0119267	0.0123776	0.000279305	0.0060501	0.0218544	0.0319257
48.8281	0.00197892	0.000415841	0.00473871	0.00913225	0.00882511	0.00459658	48.8281	0.00238206	0.00178015	0.00452293	0.00539021	0.000386652	0.00161014	48.8281	0.0219222	0.0368877	0.00598392	0.00299107	0.00096628	0.00739051
50.7813	0.00830264	0.0069384	0.00245778	0.00411221	0.0426388	0.0497019	50.7813	0.000575398	0.00141064	0.00824129	0.0138574	0.00222385	0.00543234	50.7813	0.0393605	0.0496827	0.0211965	0.020901	0.000296435	0.000278265
52.7344	0.000410704	0.00157442	0.00392927	0.00432788	0.00018758	0.00461285	52.7344	0.00551105	0.00604347	0.00352858	0.0115859	0.00199249	0.00175243	52.7344	0.00694127	0.00520203	0.0187774	0.00989489	0.00133209	0.00629975
54.6875	0.00608316	0.016029	0.000744201	0.00137946	0.00283064	0.0118712	54.6875	0.00409588	0.00538382	0.0020704	7.05344e-06	0.000818575	0.0019139	54.6875	0.0580907	0.0586749	0.00775938	0.00213082	0.00212911	0.00219313
56.6406	0.000498063	0.0117263	0.0027204	0.00166619	0.0103145	0.0184627	56.6406	0.00541466	0.00547521	0.00681079	0.00237791	0.00273781	0.00140849	56.6406	0.00355263	0.00171822	0.00718542	0.0111895	0.0173665	0.0227194
Time[sec]
L01					L02					L03
freq.[Hz]	Cortex	Hippo	Cortex SD	Hippo SD	freq.[Hz]	Cortex	Hippo	Cortex SD	Hippo SD	freq.[Hz]	Cortex	Hippo	Cortex SD	Hippo SD
0	0.0167986	0.0260502	0.0142032	0.0208367	0	0.0382692	0.0340621	0.0337854	0.0314618	0	0.034769	0.0333269	0.0415622	0.0299401
1.95313	0.208793	0.27598	0.287833	0.224765	1.95313	0.221485	0.24271	0.308004	0.311086	1.95313	0.0880976	0.076623	0.0274425	0.0757995
3.90625	0.229836	0.32795	0.324216	0.29304	3.90625	0.424696	0.747997	0.101062	0.441843	3.90625	0.25608	0.555632	0.332237	0.590703
5.85938	0.284939	0.432573	0.241808	0.164523	5.85938	0.328958	0.784317	0.142012	0.764276	5.85938	0.455563	1.43335	0.285355	0.881457
7.8125	0.438835	0.282389	0.227128	0.261302	7.8125	0.466717	0.816061	0.509561	0.555661	7.8125	0.643218	0.902076	0.855432	1.38362
9.76563	0.0649421	0.110553	0.0520211	0.0567665	9.76563	0.106574	0.119739	0.0725544	0.0404628	9.76563	0.201828	0.431591	0.166847	0.257952
11.7188	0.142217	0.344224	0.0527203	0.281143	11.7188	0.047921	0.229784	0.033461	0.248132	11.7188	0.178914	0.256028	0.168311	0.31043
13.6719	0.201436	0.176699	0.0675036	0.0730126	13.6719	0.148046	0.126472	0.085764	0.0910936	13.6719	0.255406	0.352292	0.360326	0.199112
15.625	0.174971	0.217768	0.204176	0.171866	15.625	0.0728941	0.134228	0.0883742	0.103534	15.625	0.312784	0.351408	0.368311	0.302602
17.5781	0.303249	0.452085	0.218106	0.17363	17.5781	0.0342875	0.168963	0.00830399	0.131381	17.5781	0.241361	0.359401	0.232713	0.235792
19.5313	0.196143	0.319782	0.205534	0.274481	19.5313	0.371498	0.474422	0.235181	0.255745	19.5313	0.128152	0.241023	0.11512	0.102409
21.4844	0.147919	0.248616	0.144461	0.238167	21.4844	0.048333	0.121574	0.0616812	0.121509	21.4844	0.0713237	0.109491	0.0539928	0.114624
23.4375	0.0798984	0.183194	0.11647	0.18578	23.4375	0.0642668	0.094273	0.0782952	0.0987289	23.4375	0.0517432	0.111433	0.0322931	0.0686483
25.3906	0.0496973	0.0752342	0.0520982	0.0738928	25.3906	0.0745801	0.197268	0.0196184	0.0987216	25.3906	0.18197	0.271559	0.0578613	0.189924
27.3438	0.12959	0.150537	0.189277	0.200254	27.3438	0.0725346	0.122054	0.078595	0.13463	27.3438	0.030276	0.0887703	0.0224363	0.0238473
29.2969	0.0417251	0.0890861	0.0404501	0.0424848	29.2969	0.023611	0.0432782	0.032633	0.0527819	29.2969	0.0364886	0.0712831	0.00668262	0.0379538
31.25	0.106893	0.0972814	0.110209	0.0761179	31.25	0.0168332	0.0381977	0.0124375	0.0216113	31.25	0.0271711	0.0527057	0.0139658	0.059864
33.2031	0.0407667	0.0504722	0.020752	0.0239452	33.2031	0.0315486	0.0781852	0.0452702	0.120873	33.2031	0.0421143	0.057918	0.0303734	0.0433788
35.1563	0.0209233	0.0385195	0.0161432	0.0538794	35.1563	0.0411274	0.0736112	0.0554681	0.121616	35.1563	0.04658	0.0415946	0.0486759	0.0387293
37.1094	0.0275101	0.0225366	0.0156039	0.0197743	37.1094	0.0345293	0.0482184	0.0555216	0.0663468	37.1094	0.024497	0.0183059	0.0333217	0.0175632
39.0625	0.00623426	0.00785198	0.00421064	0.00953443	39.0625	0.0437028	0.0314568	0.0375693	0.00470765	39.0625	0.0213822	0.0201242	0.0116166	0.00901427
41.0156	0.0103865	0.0196847	0.00521275	0.013055	41.0156	0.00392503	0.00569263	0.00278785	0.00605993	41.0156	0.0240705	0.028997	0.00683956	0.0230581
42.9688	0.0130735	0.0203819	0.0136516	0.0158573	42.9688	0.00612758	0.00581248	0.00428101	0.00383612	42.9688	0.0142727	0.00960607	0.0103911	0.00972217
44.9219	0.00374964	0.00219839	0.00318302	0.00202561	44.9219	0.00214329	0.00507547	0.0015564	0.00551968	44.9219	0.0410071	0.0474102	0.022192	0.030573
46.875	0.0148849	0.0216533	0.0208741	0.0290096	46.875	0.00378545	0.00642101	0.00408957	0.00876966	46.875	0.0113535	0.0167845	0.010799	0.013489
48.8281	0.00518091	0.00471489	0.00344445	0.00435941	48.8281	0.00243055	0.00292683	0.00206857	0.00213504	48.8281	0.00962413	0.0157564	0.0109419	0.018432
50.7813	0.0177997	0.0202508	0.0217089	0.0255445	50.7813	0.00368018	0.00690013	0.00403511	0.00635187	50.7813	0.0202845	0.0236207	0.019548	0.0248142
52.7344	0.00150918	0.00350505	0.00209882	0.00167803	52.7344	0.00367737	0.0064606	0.00176399	0.00492999	52.7344	0.00901692	0.00713222	0.00890595	0.00245469
54.6875	0.00321933	0.00975989	0.00269062	0.00754954	54.6875	0.00232828	0.00243492	0.0016538	0.00272599	54.6875	0.0226597	0.0209996	0.030813	0.0326278
56.6406	0.00451099	0.0106184	0.00514735	0.00845289	56.6406	0.00498775	0.0030872	0.00206978	0.00212412	56.6406	0.00936818	0.0118757	0.00716094	0.0105174
KOL
freq.[Hz]	KOCortex	KOHippo	Cortex SE	Hippo SE
0	0.0299456	0.0311464	0.00210314	0.000808575
1.95313	0.172792	0.198438	0.0134414	0.0194986
3.90625	0.303537	0.54386	0.0193061	0.0383901
5.85938	0.356487	0.883415	0.0161726	0.0926923
7.8125	0.516257	0.666842	0.0202351	0.0612924
9.76563	0.124448	0.220628	0.0128116	0.0333668
11.7188	0.123017	0.276679	0.0123373	0.0109452
13.6719	0.201629	0.218488	0.00980059	0.0216475
15.625	0.186883	0.234468	0.0219797	0.0200008
17.5781	0.192966	0.326816	0.0257175	0.0263539
19.5313	0.231931	0.345075	0.0229237	0.0216784
21.4844	0.089192	0.159894	0.00951985	0.0140715
23.4375	0.0653028	0.129633	0.00257542	0.00861232
25.3906	0.102083	0.181354	0.012834	0.0180977
27.3438	0.0774668	0.120454	0.00909955	0.00564414
29.2969	0.0339416	0.0678825	0.00170192	0.0042161
31.25	0.0502993	0.0627283	0.00899796	0.00562157
33.2031	0.0381432	0.0621918	0.00104993	0.00261853
35.1563	0.0362102	0.0512418	0.00246779	0.00354804
37.1094	0.0288455	0.029687	0.000939837	0.00295542
39.0625	0.0237731	0.019811	0.00344122	0.00215538
41.0156	0.012794	0.0181248	0.001878	0.00214164
42.9688	0.0111579	0.0119335	0.000802865	0.00137997
44.9219	0.0156334	0.018228	0.00401463	0.00462158
46.875	0.010008	0.0149529	0.00103533	0.00142035
48.8281	0.0057452	0.00779938	0.000662715	0.00126866
50.7813	0.0139215	0.0169239	0.0016351	0.00161447
52.7344	0.00473449	0.00569929	0.000705447	0.000352316
54.6875	0.00940245	0.0110648	0.00209774	0.00170723
56.6406	0.00628897	0.0085271	0.000488807	0.000867748

## Sheet: Locomotive - WT&KO result
freq.[Hz]	WTCortex	WTHippo	KOCortex	KOHippo	Cortex SE	Hippo SE	Cortex SE	Hippo SE
0	0.00289667	0.0100074	0.0299456	0.0311464	0.000714653	0.000361952	0.00210314	0.000808575
1.95313	0.021431	0.107363	0.172792	0.198438	0.00315946	0.0148451	0.0134414	0.0194986
3.90625	0.028728	0.13511	0.303537	0.54386	0.00414976	0.0221741	0.0193061	0.0383901
5.85938	0.024896	0.109155	0.356487	0.883415	0.00386173	0.00699662	0.0161726	0.0926923
7.8125	0.0312386	0.279824	0.516257	0.666842	0.00437629	0.0212453	0.0202351	0.0612924
9.76563	0.0232784	0.177343	0.124448	0.220628	0.00269263	0.0065664	0.0128116	0.0333668
11.7188	0.0231728	0.173009	0.123017	0.276679	0.00173074	0.0136231	0.0123373	0.0109452
13.6719	0.00898019	0.071905	0.201629	0.218488	0.000730633	0.0127834	0.00980059	0.0216475
15.625	0.0264644	0.0681861	0.186883	0.234468	0.00189395	0.00689264	0.0219797	0.0200008
17.5781	0.0171361	0.162785	0.192966	0.326816	0.00228074	0.0177197	0.0257175	0.0263539
19.5313	0.0217913	0.0632302	0.231931	0.345075	0.00236534	0.00350609	0.0229237	0.0216784
21.4844	0.0139901	0.157277	0.089192	0.159894	0.000630443	0.0231399	0.00951985	0.0140715
23.4375	0.0179794	0.0993865	0.0653028	0.129633	0.00187138	0.015172	0.00257542	0.00861232
25.3906	0.0130934	0.127136	0.102083	0.181354	0.00153406	0.0200292	0.012834	0.0180977
27.3438	0.00458425	0.101146	0.0774668	0.120454	0.000318682	0.0198225	0.00909955	0.00564414
29.2969	0.00609566	0.0861624	0.0339416	0.0678825	0.00104856	0.0185345	0.00170192	0.0042161
31.25	0.00942195	0.087013	0.0502993	0.0627283	0.0019808	0.021926	0.00899796	0.00562157
33.2031	0.00727774	0.0863546	0.0381432	0.0621918	0.00129214	0.0246211	0.00104993	0.00261853
35.1563	0.00358675	0.0397112	0.0362102	0.0512418	0.000317056	0.00954147	0.00246779	0.00354804
37.1094	0.00702526	0.0267143	0.0288455	0.029687	0.0012808	0.00457459	0.000939837	0.00295542
39.0625	0.00293326	0.0206912	0.0237731	0.019811	0.00022581	0.00422209	0.00344122	0.00215538
41.0156	0.00275008	0.0104241	0.012794	0.0181248	0.00069298	0.00138899	0.001878	0.00214164
42.9688	0.0017937	0.0106441	0.0111579	0.0119335	0.00027558	0.00247519	0.000802865	0.00137997
44.9219	0.00187054	0.00276237	0.0156334	0.018228	0.00024698	0.000202422	0.00401463	0.00462158
46.875	0.00182792	0.00273937	0.010008	0.0149529	3.31475e-05	3.91046e-05	0.00103533	0.00142035
48.8281	0.000612584	0.00166167	0.0057452	0.00779938	6.55132e-05	0.000105626	0.000662715	0.00126866
50.7813	0.00281534	0.00430088	0.0139215	0.0169239	0.000227214	0.000171034	0.0016351	0.00161447
52.7344	0.00174706	0.00380835	0.00473449	0.00569929	0.00016216	0.000248423	0.000705447	0.000352316
54.6875	0.00192983	0.00510271	0.00940245	0.0110648	0.000264505	0.000236923	0.00209774	0.00170723
56.6406	0.00114296	0.00337957	0.00628897	0.0085271	0.000169491	0.000417145	0.000488807	0.000867748

## Sheet: REST - WT
Time[sec]	93.984	Time[sec]	99.982	Time[sec]	114.002		Time[sec]	170.976	Time[sec]	230.994	Time[sec]	235.99		Time[sec]	280	Time[sec]	285.998	Time[sec]	294.002
	L01		L01		L01	L01		L02		L02		L2	L2		L03		L3		L3	L03
	Power[μV2/Hz]		Power[μV2/Hz]		Power[μV2/Hz]			Power[μV2/Hz]		Power[μV2/Hz]		Power[μV2/Hz]			Power[μV2/Hz]		Power[μV2/Hz]		Power[μV2/Hz]
freq.[Hz]	Cortex	Hippo	Cortex	Hippo	Cortex	Hippo	freq.[Hz]	Cortex	Hippo	Cortex	Hippo	Cortex	Hippo	freq.[Hz]	Cortex	Hippo	Cortex	Hippo	Cortex	Hippo
0	0.00835034	0.000339511	0.0027655	3.65126e-06	0.00768993	0.0244656	0	0.000201799	0.000538374	0.000638551	0.000507171	0.00265176	0.0146566	0	0.00197069	0.00418546	0.0027655	0.0257633	0.00211891	0.000672502
1.95313	0.0539941	0.167864	0.00727994	0.0512878	0.0278401	0.0481379	1.95313	0.0870429	0.100059	0.00217707	0.0354663	0.00776751	0.0284384	1.95313	0.00407114	0.0134619	0.00973581	0.0714585	0.00114685	0.00247744
3.90625	0.0207382	0.11764	0.00825792	0.00219625	0.00226492	0.0820498	3.90625	0.0290737	0.0381763	0.0075562	0.0300037	0.00502854	0.0152401	3.90625	0.0071386	0.0475399	0.031152	0.109675	0.00142235	0.00145382
5.85938	0.0229499	0.153015	0.0471485	0.156242	0.0424685	0.117783	5.85938	0.0022292	0.0915754	0.00545785	0.117326	0.00864578	0.0358851	5.85938	0.0237964	0.103315	0.0659252	0.258067	0.00286989	0.0748012
7.8125	0.00860934	0.157073	0.00552725	0.245836	0.00370217	0.0367361	7.8125	0.0551849	0.0994657	0.0163759	0.0659395	0.0105839	0.208422	7.8125	0.0267801	0.17186	0.0150505	0.0445523	0.00523604	0.0785888
9.76563	0.0180691	0.0173992	0.00162912	0.112364	0.0361694	0.232736	9.76563	0.00401208	0.0282768	0.000682177	0.165358	0.00263046	0.0500574	9.76563	0.00729593	0.015953	0.0173491	0.0590313	0.00430373	0.0618081
11.7188	0.0160277	0.0650437	0.00256394	0.0244454	0.0156385	0.090755	11.7188	0.0152837	0.0190273	0.00293491	0.0591926	0.000157324	0.135375	11.7188	0.00460967	0.000659622	0.00095701	0.00295082	0.00375913	0.00380159
13.6719	0.0867747	0.585042	0.00583629	0.0547866	0.021059	0.0473319	13.6719	0.00392017	0.00984512	0.00247823	0.00480359	0.00592521	0.158358	13.6719	0.0420668	0.14295	0.0353366	0.392756	0.00263162	0.041002
15.625	0.025633	1.13004e-05	0.00490875	0.0564413	0.00308231	0.0119746	15.625	0.0301252	0.0875035	0.0143583	0.0457392	0.00498403	0.0677208	15.625	0.00302982	0.0844538	0.00929715	0.0876761	0.00233409	0.0171277
17.5781	0.00462634	0.0263617	0.0210129	0.00324696	0.000443121	0.00657594	17.5781	0.0225226	0.000685371	0.00378112	0.0623827	0.00102833	0.041481	17.5781	0.00715106	0.044322	0.00672588	0.120776	0.00189077	0.039295
19.5313	0.00044363	0.00102955	0.0154167	0.110035	0.00780582	0.0545311	19.5313	0.00234896	0.0833846	0.00446271	0.014766	0.00524304	0.0792404	19.5313	0.00577642	0.0131523	0.0144484	0.150753	0.000731582	0.00495264
21.4844	0.00625564	0.0510623	0.0020896	0.0238227	0.00506904	0.134311	21.4844	0.00118924	0.00299931	0.0027681	0.0849405	0.0029719	0.0364566	21.4844	0.000552748	0.0132632	0.0136294	0.0756163	0.00138907	0.0379406
23.4375	0.0010174	0.0609286	0.00083505	0.0335088	0.00180139	0.0624253	23.4375	0.00607787	0.0522309	0.00326379	0.0536342	0.00431914	0.0190561	23.4375	0.00295264	0.0142683	0.00432648	0.000251983	0.00296348	0.102691
25.3906	0.00355359	0.0075941	0.0335094	0.277882	0.00337159	0.0310762	25.3906	0.00336336	0.0621177	0.00058132	0.0133551	0.000926799	0.0530507	25.3906	0.00961027	0.0483785	0.0321137	0.0266644	8.95047e-05	0.00322117
27.3438	0.00493887	0.0130285	0.0104085	0.0226405	0.00376992	0.042024	27.3438	0.00613013	0.039842	0.00219906	0.0675689	0.00200543	0.0140039	27.3438	0.00137049	0.0140711	0.00213428	0.0287296	0.00216097	0.00540067
29.2969	0.00704206	0.050177	0.0181311	0.0292324	0.00720425	0.0386178	29.2969	1.72653e-05	0.0363015	0.00010664	0.00300031	0.00192366	0.0301799	29.2969	0.000287521	0.00537433	0.000547441	0.00466968	0.000499828	0.00493539
31.25	0.0052385	0.00434382	0.00126598	0.0188757	0.00978205	0.00510592	31.25	0.0064042	0.021371	0.00434616	0.0301456	0.00258554	0.0436838	31.25	0.000116	0.00990219	0.000975258	0.00134331	0.000621932	0.0502733
33.2031	0.00862687	0.109515	0.00177551	0.0215706	0.0163229	0.0467241	33.2031	0.00324751	0.020995	0.000105669	0.0380744	0.000704349	0.0109465	33.2031	0.00229459	0.0259424	0.00532233	0.00199653	0.000252629	0.000328505
35.1563	0.00258554	0.0281822	0.000233756	0.0040971	0.00669688	0.0167039	35.1563	0.00395218	0.0182414	0.000618158	0.00157477	0.000380333	0.0166347	35.1563	0.00110116	0.0112012	0.000311741	0.00619843	0.000186392	0.0185314
37.1094	0.00280922	0.0350001	0.0025736	0.00702184	0.00401433	0.0135924	37.1094	0.00206283	0.0422075	0.0015671	0.00945105	0.000179529	0.00791156	37.1094	5.71526e-05	0.000588838	0.000914396	0.00903896	0.000469237	0.00231317
39.0625	0.000277615	0.0338829	0.00601145	0.00203498	0.00544512	0.0155776	39.0625	0.00181318	0.000275193	0.000673011	0.000528165	0.000386007	0.000315957	39.0625	0.000234747	0.00462899	0.00326895	0.00926404	0.00108324	0.00887579
41.0156	0.0024155	0.00799808	0.00419369	0.00895641	0.00136327	0.0019113	41.0156	0.00104355	0.0100186	0.000353027	0.000843971	0.000478379	0.00685853	41.0156	0.000309807	0.000763717	0.000410276	0.00143216	0.000114542	0.00531656
42.9688	0.000626889	0.00244793	0.00108719	0.00770669	0.000830048	0.00150174	42.9688	0.00304672	0.000998192	0.000341456	0.00190181	5.49382e-05	0.000333152	42.9688	6.58153e-05	0.000348316	0.00081427	0.00422553	4.05982e-05	0.000556076
44.9219	0.000171402	0.00214553	0.00335622	0.00610467	0.000879388	0.0025826	44.9219	0.000727319	0.00126429	0.000232469	0.00419771	4.58909e-05	7.66907e-05	44.9219	0.000388799	0.00116751	3.71546e-05	0.00327861	2.77416e-05	4.86261e-05
46.875	2.43973e-05	0.00161012	0.002365	0.00372497	0.000379993	0.00106702	46.875	0.000530588	0.000692341	0.000103748	0.00168143	0.000234203	0.000714827	46.875	7.82778e-05	0.000562626	8.26415e-05	0.00076056	4.64776e-05	0.000135842
48.8281	0.00151356	0.00344731	0.00119204	0.00195489	0.00238342	0.00492353	48.8281	0.000522923	0.000119784	5.37216e-05	0.000218094	2.24451e-05	0.000289913	48.8281	0.000288063	0.000675775	0.000571632	0.000907636	4.06686e-05	0.000202032
50.7813	0.000605448	0.00249213	0.00141671	0.00455646	0.000875843	0.00282957	50.7813	0.00160625	0.00557382	8.08407e-05	5.8898e-05	5.22856e-05	1.50824e-05	50.7813	6.09313e-05	0.000654073	0.00214058	0.00372453	7.74866e-05	0.000387861
52.7344	0.000844716	0.00139165	3.59315e-05	0.00118171	0.00260556	0.00743974	52.7344	0.000678228	0.000864437	0.00026612	0.00170812	6.6061e-05	0.000245729	52.7344	3.88364e-05	0.00102799	0.00112939	0.00134057	0.000108191	0.000457686
54.6875	0.00227893	0.00312167	0.000195698	0.000753695	0.00328808	0.00585487	54.6875	0.000117737	0.000499274	0.000240317	0.000660914	1.0746e-05	0.000619041	54.6875	9.03778e-05	0.000496888	0.00120564	0.000164848	4.61856e-05	0.000170181
56.6406	0.000197604	0.00164676	0.00341475	0.00791898	0.0026415	0.0009879	56.6406	0.00035465	0.00256528	0.000654135	0.00303213	7.24724e-05	0.00204559	56.6406	8.06295e-05	0.00168891	0.000605673	0.000497894	6.26191e-05	0.000106861
Time[sec]
L01					L02					L03
freq.[Hz]	Cortex	Hippo	Cortex SD	Hippo SD	freq.[Hz]	Cortex	Hippo	Cortex SD	Hippo SD	freq.[Hz]	Cortex	Hippo	Cortex SD	Hippo SD
0	0.00626859	0.00826959	0.00305168	0.0140272	0	0.00116404	0.00523405	0.00130678	0.00816018	0	0.00228503	0.0102071	0.000422645	0.0135861
1.95313	0.0297047	0.0890966	0.0234128	0.0682328	1.95313	0.0323292	0.0546546	0.0474659	0.0394781	1.95313	0.0049846	0.0291326	0.00436673	0.0370645
3.90625	0.0104203	0.0672953	0.00942457	0.0591192	3.90625	0.0138861	0.0278067	0.0132134	0.0116249	3.90625	0.0132377	0.0528896	0.0157754	0.0543086
5.85938	0.0375223	0.142347	0.0128352	0.0213339	5.85938	0.00544428	0.0815955	0.00320831	0.0416276	5.85938	0.0308638	0.145394	0.0321163	0.0986134
7.8125	0.00594625	0.146548	0.00248027	0.104947	7.8125	0.0273816	0.124609	0.0242519	0.0744947	7.8125	0.0156889	0.0983337	0.0107862	0.0659106
9.76563	0.0186225	0.120833	0.0172768	0.107918	9.76563	0.00244157	0.0812307	0.00167297	0.0736658	9.76563	0.00964959	0.0455975	0.00683375	0.0257104
11.7188	0.01141	0.0600814	0.00766342	0.0334322	11.7188	0.00612531	0.0711983	0.00805207	0.0590957	11.7188	0.0031086	0.00247068	0.00191125	0.00162508
13.6719	0.03789	0.229053	0.0430142	0.308318	13.6719	0.00410787	0.0576689	0.00173114	0.0872357	13.6719	0.0266783	0.192236	0.0210952	0.180982
15.625	0.011208	0.0228091	0.0125257	0.0297342	15.625	0.0164892	0.0669878	0.0127053	0.0208918	15.625	0.00488702	0.0630859	0.00383509	0.0398335
17.5781	0.00869412	0.0120615	0.0108715	0.0124957	17.5781	0.00911068	0.0348497	0.0116963	0.0313787	17.5781	0.0052559	0.068131	0.00292203	0.0456611
19.5313	0.00788872	0.0551985	0.00748688	0.0545058	19.5313	0.00401824	0.0591303	0.00149736	0.0384765	19.5313	0.00698547	0.056286	0.00693788	0.0819135
21.4844	0.00447143	0.069732	0.00214635	0.0575616	21.4844	0.00230975	0.0414655	0.000975723	0.0411996	21.4844	0.00519041	0.0422734	0.00732034	0.0314015
23.4375	0.00121795	0.0522876	0.000513437	0.0162801	23.4375	0.0045536	0.0416404	0.00142162	0.0195712	23.4375	0.0034142	0.0390704	0.000790076	0.055541
25.3906	0.0134782	0.105517	0.0173478	0.149733	25.3906	0.00162383	0.0428412	0.00151635	0.025935	25.3906	0.0139378	0.026088	0.0164448	0.0225842
27.3438	0.00637243	0.0258977	0.00354387	0.0147696	27.3438	0.00344487	0.0404716	0.00232751	0.026788	27.3438	0.00188858	0.0160671	0.000448878	0.0117919
29.2969	0.0107925	0.0393424	0.00635596	0.0104911	29.2969	0.000682522	0.0231606	0.00107579	0.0177256	29.2969	0.00044493	0.00499313	0.000138383	0.000355856
31.25	0.00542884	0.00944181	0.00426122	0.00817887	31.25	0.0044453	0.0317335	0.00191126	0.0112408	31.25	0.000571063	0.0205063	0.000431882	0.0261318
33.2031	0.00890843	0.0592699	0.00727778	0.0452946	33.2031	0.00135251	0.0233386	0.0016682	0.013715	33.2031	0.00262318	0.00942248	0.00255077	0.014331
35.1563	0.00317206	0.0163277	0.00327124	0.012047	35.1563	0.00165022	0.0121503	0.0019971	0.00919383	35.1563	0.000533098	0.011977	0.000495933	0.00620298
37.1094	0.00313238	0.0185381	0.000772821	0.0146301	37.1094	0.00126982	0.0198567	0.000976211	0.0193717	37.1094	0.000480262	0.00398032	0.000428728	0.00446494
39.0625	0.0039114	0.0171652	0.00315966	0.0159832	39.0625	0.000957399	0.000373105	0.000754893	0.000135824	39.0625	0.00152898	0.00758961	0.00156544	0.00257131
41.0156	0.00265749	0.0062886	0.00143064	0.00382101	41.0156	0.000624985	0.00590703	0.000367866	0.00466074	41.0156	0.000278208	0.00250415	0.000150378	0.00245845
42.9688	0.000848042	0.00388545	0.000230677	0.00334293	42.9688	0.0011477	0.00107772	0.00165082	0.000787347	42.9688	0.000306895	0.00170997	0.000439581	0.00218101
44.9219	0.001469	0.00361093	0.00167227	0.00217067	44.9219	0.000335226	0.00184623	0.000352144	0.00212125	44.9219	0.000151232	0.00149825	0.000205793	0.0016402
46.875	0.00092313	0.00213404	0.00126129	0.00140429	46.875	0.000289513	0.00102953	0.000218729	0.000564672	46.875	6.91323e-05	0.000486343	1.97405e-05	0.000319269
48.8281	0.00169634	0.00344191	0.000616363	0.00148433	48.8281	0.000199697	0.000209264	0.000280359	8.54076e-05	48.8281	0.000300121	0.000595148	0.000265687	0.000359645
50.7813	0.000966	0.00329272	0.000413077	0.00110736	50.7813	0.000579792	0.0018826	0.000889053	0.00319677	50.7813	0.000759666	0.00158882	0.00119594	0.00185436
52.7344	0.00116207	0.0033377	0.00131388	0.00355402	52.7344	0.000336803	0.000939429	0.000312144	0.000734074	52.7344	0.000425472	0.000942082	0.000610596	0.000447667
54.6875	0.0019209	0.00324341	0.00157697	0.00255277	54.6875	0.000122933	0.000593076	0.000114874	8.38898e-05	54.6875	0.000447401	0.000277306	0.000657026	0.000190183
56.6406	0.00208462	0.00351788	0.00167931	0.00382567	56.6406	0.000360419	0.00254767	0.000290874	0.000493506	56.6406	0.000249641	0.000764555	0.000308465	0.000824045
WTL
freq.[Hz]	WTCortex	WTHippo	Cortex SD	Hippo SD
0	0.00323922	0.00790357	0.000894239	0.000835547
1.95313	0.0223395	0.0576279	0.00502898	0.0100308
3.90625	0.0125147	0.0493305	0.000614177	0.00666115
5.85938	0.0246101	0.123112	0.00564291	0.0119956
7.8125	0.0163389	0.123164	0.00357748	0.0080466
9.76563	0.0102379	0.0825538	0.00270217	0.0125451
11.7188	0.00688132	0.0445834	0.00140068	0.0122973
13.6719	0.0228921	0.159653	0.00573546	0.0300729
15.625	0.0108614	0.0509609	0.00193628	0.00815272
17.5781	0.0076869	0.0383474	0.000705195	0.0093993
19.5313	0.00629747	0.0568716	0.000674961	0.000676754
21.4844	0.00399053	0.0511569	0.000499778	0.00536385
23.4375	0.00306192	0.0443328	0.000565167	0.00233595
25.3906	0.00967995	0.0581489	0.00232686	0.0139563
27.3438	0.00390196	0.0274788	0.000758868	0.00409294
29.2969	0.00397331	0.0224987	0.00196892	0.00572807
31.25	0.00348174	0.0205605	0.000856079	0.00371531
33.2031	0.00429471	0.030677	0.0013486	0.00857373
35.1563	0.00178513	0.013485	0.000441548	0.000821131
37.1094	0.00162749	0.014125	0.000453919	0.00293676
39.0625	0.00213259	0.00837596	0.000522258	0.00280787
41.0156	0.00118689	0.00489993	0.00042844	0.00069452
42.9688	0.000767547	0.00222438	0.000142049	0.000490952
44.9219	0.00065182	0.00231847	0.000237885	0.000377583
46.875	0.000427258	0.00121664	0.000147783	0.000279877
48.8281	0.000732053	0.00141544	0.000278869	0.000588516
50.7813	0.000768486	0.00225471	6.44184e-05	0.000303621
52.7344	0.000641448	0.00173974	0.000151015	0.000461292
54.6875	0.000830412	0.00137126	0.000319409	0.000542999
56.6406	0.000898226	0.0022767	0.000342979	0.000465506

## Sheet: REST - KO
Time[sec]	5.032	Time[sec]	12	Time[sec]	17.014		Time[sec]	1330.01	Time[sec]	1340.02	Time[sec]	1349.99		Time[sec]	2180	Time[sec]	2189.99	Time[sec]	2200
	L01		L01		L01	L01		L02		L02		L2	L2		L03		L3		L3	L03
	Power[μV2/Hz]		Power[μV2/Hz]		Power[μV2/Hz]			Power[μV2/Hz]		Power[μV2/Hz]		Power[μV2/Hz]			Power[μV2/Hz]		Power[μV2/Hz]		Power[μV2/Hz]
freq.[Hz]	Cortex	Hippo	Cortex	Hippo	Cortex	Hippo	freq.[Hz]	Cortex	Hippo	Cortex	Hippo	Cortex	Hippo	freq.[Hz]	Cortex	Hippo	Cortex	Hippo	Cortex	Hippo
0	0.000300926	0.000470956	1.36013e-05	0.00399345	0.00640689	0.0609626	0	0.0191835	0.0577048	0.00154752	4.76899e-06	0.0468717	0.0509017	0	0.017591	0.0448136	0.00516207	0.0222957	0.00893438	0.0193435
1.95313	0.00976719	0.0184178	0.00557567	0.322338	0.0268469	0.0433257	1.95313	0.0568479	0.0172514	0.121269	0.0961636	0.18335	0.083033	1.95313	0.0436949	0.0850079	0.00601125	0.0229801	0.0573581	0.152531
3.90625	0.266314	0.198651	0.162279	0.222214	0.0891818	0.0629627	3.90625	0.44743	0.161606	0.00958385	0.248497	0.165412	0.244525	3.90625	0.20102	0.708842	0.829072	0.244329	0.67353	0.867879
5.85938	0.0190077	0.0196007	0.628058	0.498094	0.0227776	0.085586	5.85938	0.185429	1.38126	0.080243	0.471137	0.206092	0.135468	5.85938	0.0328562	0.0104951	0.000858466	0.100894	0.0857864	0.0566904
7.8125	0.0850269	0.0525923	0.46055	0.989636	0.121488	0.00903515	7.8125	0.113517	0.491988	0.1249	0.62507	0.0944593	0.148731	7.8125	0.00859089	0.083794	0.278451	0.433915	0.00472289	0.00401156
9.76563	0.0115153	0.0109711	0.00115384	0.240741	0.0774639	0.182984	9.76563	0.0204326	0.0470626	0.00413691	0.0262049	0.00238995	0.00644176	9.76563	0.00322393	0.0591491	0.0266195	0.0104106	0.150084	0.134647
11.7188	0.0394724	0.00959544	0.23375	1.05252	0.0939132	0.000678275	11.7188	0.0687688	0.21483	0.000318776	0.12208	0.00518517	0.0706127	11.7188	0.0385746	0.0472255	0.0191703	0.0923451	0.00350678	0.0218668
13.6719	0.00800893	0.0169277	0.348457	0.817883	0.0643646	0.0656808	13.6719	0.0337326	0.0133441	0.0386229	0.193821	0.0114411	0.0120903	13.6719	0.0854015	0.0236158	0.0328803	0.0512755	0.0333654	0.0586295
15.625	0.00890916	0.101731	0.0852836	0.253109	0.0885577	0.055693	15.625	0.0656543	0.236902	0.0404359	0.00402648	0.0204487	0.00946017	15.625	0.00170893	0.0562124	0.104113	0.0415694	0.0228265	0.0654582
17.5781	0.0070208	0.0290793	0.0400698	0.0711114	0.0363781	0.100725	17.5781	0.410161	1.08763	0.00213363	0.190485	0.0322247	0.0781188	17.5781	0.00754441	0.0352983	0.0109007	0.0284098	0.0299053	0.0431124
19.5313	0.01851	0.0873773	0.271127	0.160573	0.00742553	0.00693887	19.5313	0.00711809	5.03779e-05	0.0226372	0.0947971	0.00163529	0.00649413	19.5313	0.00110974	0.00330644	0.0743463	0.076574	0.0840638	0.0534461
21.4844	0.010789	0.00117036	0.122119	0.0326042	0.0017332	0.0345567	21.4844	0.0240656	0.0557463	0.0330374	0.527773	0.0184407	0.0261978	21.4844	0.000861615	0.00484531	0.0019018	0.0108578	0.00779107	0.0171947
23.4375	0.0276798	0.0195609	0.0607706	0.061172	0.00639421	0.0514189	23.4375	0.0298454	0.164846	0.0305118	0.417215	0.0210879	0.00231312	23.4375	0.00479862	0.0181819	0.0557526	0.115849	0.0100573	0.0152707
25.3906	0.00284177	0.00685692	0.0313091	0.142774	0.00621962	0.0417385	25.3906	0.0285163	0.139886	0.00604643	0.243195	0.0378376	0.0200904	25.3906	0.00136147	0.0069121	0.00392697	0.00732417	0.0018015	0.0193372
27.3438	0.00936148	0.00654509	0.00268106	0.00106109	0.0227145	0.0249083	27.3438	0.0281629	0.0182432	0.0103638	0.0119469	0.000684729	0.00763273	27.3438	0.00569932	0.0124206	0.0108323	0.00741136	0.00918915	0.0234336
29.2969	0.0156531	0.0844328	0.00183744	0.00165203	0.00174341	0.0144562	29.2969	0.00825975	0.0359432	0.0119922	0.021117	0.00682965	0.00489094	29.2969	0.00127672	0.0420543	0.0513758	0.225424	0.0282176	0.0175795
31.25	0.00340972	0.00980191	0.0129672	0.0167137	0.00222175	0.00035325	31.25	0.0121996	0.0339422	0.000237909	0.00281021	0.00863926	0.013954	31.25	0.0124965	0.0239888	0.0194165	0.0318866	0.0346184	0.0527053
33.2031	0.00107421	0.00650124	0.0194149	0.0436113	0.000990075	0.000644022	33.2031	0.00144411	0.000972944	0.000446784	0.00205458	0.000342371	0.00461664	33.2031	0.00178717	0.0107725	0.00572371	0.00280635	0.00363053	0.00394585
35.1563	0.00263134	0.0034718	0.00401202	0.00186649	0.000224812	0.000682081	35.1563	0.000178504	0.00324604	0.000428065	0.00530771	0.00162547	0.0136064	35.1563	0.0086129	0.0152726	0.00665923	0.00516386	0.00417351	0.010404
37.1094	0.00742148	0.00571095	0.00285683	0.0069382	0.00217483	0.00219969	37.1094	0.00396091	0.0296087	0.00141289	0.00565843	0.00147248	0.00147668	37.1094	0.00177926	0.00347735	0.00231215	0.0148981	0.00751377	0.00715549
39.0625	3.1597e-05	0.00544334	0.00221239	0.00281619	0.00242884	0.00870582	39.0625	0.0150902	0.0264579	0.00221486	0.00674374	0.00154236	2.48621e-05	39.0625	0.00279774	0.000457891	0.0117457	0.00522333	0.00702859	0.00487439
41.0156	0.000203209	0.00308088	0.000182387	0.00105749	0.000377933	0.00174023	41.0156	0.000356931	0.00637047	0.000586884	0.0037444	0.00723562	0.0153827	41.0156	0.00142604	0.00147992	0.000992169	0.0010356	0.00230751	0.00540775
42.9688	0.00175574	0.00155808	0.00115329	0.0015737	3.63568e-05	0.000561329	42.9688	0.00280859	0.00302829	0.000345824	0.00122916	0.00100412	1.86188e-05	42.9688	0.0015165	0.00313612	0.000830046	0.00150344	0.00017314	0.000835187
44.9219	7.73912e-05	1.62208e-05	0.000471235	0.000467934	0.000790981	0.000517397	44.9219	0.00111228	0.000366722	0.000213157	0.00038397	0.000254977	0.00170234	44.9219	0.000774792	0.000358242	0.00222335	0.00332331	0.000939727	0.000911559
46.875	0.000160365	0.00018018	0.000594654	0.000538548	0.000363079	0.000578851	46.875	0.000353488	0.000319456	9.35933e-05	0.000270743	0.000218699	0.00119632	46.875	8.01517e-05	6.09146e-05	0.00161982	0.00369916	0.000569108	0.00102244
48.8281	0.000302228	0.000715294	5.7996e-05	2.51598e-05	1.87852e-05	0.000112293	48.8281	0.00127423	0.00109131	0.000221422	7.9783e-05	2.63974e-05	0.000664575	48.8281	0.000460663	0.000414908	0.00188447	0.00328333	4.57768e-05	0.000393926
50.7813	4.09209e-05	0.00014265	7.51278e-05	1.03453e-05	7.09324e-05	0.000149163	50.7813	0.000312442	0.000359259	9.6583e-05	0.000154198	2.03523e-05	0.000274223	50.7813	1.1971e-05	7.78677e-05	0.000663989	0.00167587	1.90194e-05	4.85342e-05
52.7344	3.75676e-05	0.000466637	7.71252e-05	0.000100184	3.57016e-05	0.000103093	52.7344	0.000545502	0.000281597	1.16017e-05	0.000590322	0.000193814	0.000915151	52.7344	0.000858188	0.000708146	0.00130173	0.00261093	0.000101476	0.000557431
54.6875	0.000522578	0.000739171	0.000137733	0.000428091	1.68988e-05	0.000231004	54.6875	6.80777e-05	0.000231795	0.000155214	0.00221687	3.25594e-05	5.72862e-05	54.6875	1.80944e-06	2.37626e-05	0.00210926	0.00355698	0.000695231	0.00121948
56.6406	0.000498201	0.00042604	0.000408194	0.00036211	2.91511e-05	0.000182737	56.6406	0.00343686	0.00160686	0.000225351	6.06865e-05	0.000206655	0.000450715	56.6406	0.000187531	0.000463241	0.000686179	0.00162133	0.000479031	0.000390653
Time[sec]
L01					L02					L03
freq.[Hz]	Cortex	Hippo	Cortex SD	Hippo SD	freq.[Hz]	Cortex	Hippo	Cortex SD	Hippo SD	freq.[Hz]	Cortex	Hippo	Cortex SD	Hippo SD
0	0.00224047	0.021809	0.00361108	0.0339537	0	0.0225342	0.0362038	0.0228471	0.0315332	0	0.0105625	0.0288176	0.00637241	0.0139314
1.95313	0.0140633	0.128027	0.0112676	0.168738	1.95313	0.120489	0.0654827	0.0632547	0.0422823	1.95313	0.0356881	0.0868397	0.0265934	0.0647949
3.90625	0.172592	0.161276	0.0890153	0.085953	3.90625	0.207475	0.218209	0.221933	0.0490601	3.90625	0.567874	0.607017	0.327085	0.324006
5.85938	0.223281	0.201094	0.350552	0.259317	5.85938	0.157255	0.662622	0.0674895	0.644592	5.85938	0.0398337	0.0560265	0.0428918	0.0452031
7.8125	0.222355	0.350421	0.207087	0.554005	7.8125	0.110959	0.42193	0.0153808	0.245776	7.8125	0.0972549	0.173907	0.156932	0.22868
9.76563	0.0300443	0.144899	0.041392	0.119526	9.76563	0.00898649	0.0265698	0.00995104	0.0203129	9.76563	0.0599758	0.0680689	0.0789079	0.0625967
11.7188	0.122379	0.354265	0.100218	0.604723	11.7188	0.0247576	0.135841	0.0381924	0.0730868	11.7188	0.0204172	0.0538125	0.0175671	0.0356979
13.6719	0.140277	0.300164	0.182478	0.44902	13.6719	0.0279322	0.0730851	0.0144895	0.104562	13.6719	0.0505491	0.0445069	0.0301841	0.0184621
15.625	0.0609168	0.136844	0.0450697	0.103286	15.625	0.0421796	0.0834629	0.0226532	0.13291	15.625	0.0428828	0.0544133	0.0540679	0.0120456
17.5781	0.0278229	0.0669719	0.0181095	0.0360018	17.5781	0.148173	0.452078	0.227386	0.553264	17.5781	0.0161168	0.0356068	0.0120585	0.00735615
19.5313	0.0990208	0.0849631	0.149151	0.0768455	19.5313	0.0104635	0.0337805	0.0108933	0.05294	19.5313	0.0531733	0.0444422	0.0453494	0.0374545
21.4844	0.0448804	0.0227771	0.0670437	0.0187374	21.4844	0.0251812	0.203239	0.00736202	0.281443	21.4844	0.00351816	0.0109659	0.00373682	0.00617541
23.4375	0.0316149	0.0440506	0.0274009	0.0217621	23.4375	0.0271484	0.194791	0.00525908	0.209066	23.4375	0.0235362	0.0497672	0.0280239	0.057247
25.3906	0.0134568	0.0637898	0.0155525	0.0705908	25.3906	0.0241334	0.13439	0.0163425	0.111654	25.3906	0.00236331	0.0111912	0.00137192	0.00705769
27.3438	0.0115857	0.0108382	0.0102002	0.0124898	27.3438	0.0130705	0.0126076	0.0139376	0.005336	27.3438	0.00857359	0.0144219	0.00262127	0.00819645
29.2969	0.00641132	0.0335137	0.00800376	0.0445596	29.2969	0.0090272	0.0206504	0.00266547	0.0155314	29.2969	0.0269567	0.0950193	0.0250733	0.113595
31.25	0.00619956	0.00895629	0.00589097	0.00821294	31.25	0.00702559	0.0169021	0.00614194	0.015774	31.25	0.0221771	0.0361936	0.0113164	0.0148348
33.2031	0.00715973	0.0169189	0.0106134	0.0233011	33.2031	0.000744422	0.00254805	0.000608193	0.0018713	33.2031	0.0037138	0.00584157	0.00196959	0.00430815
35.1563	0.00228939	0.00200679	0.00191662	0.00140014	35.1563	0.000744013	0.00738672	0.000773495	0.00548416	35.1563	0.00648188	0.0102802	0.002225	0.00505551
37.1094	0.00415105	0.00494961	0.00285273	0.00245929	37.1094	0.00228209	0.0122479	0.0014542	0.0151796	37.1094	0.00386839	0.00851031	0.00316821	0.00582967
39.0625	0.00155761	0.00565512	0.00132599	0.00295052	39.0625	0.00628247	0.0110755	0.00763512	0.0137386	39.0625	0.00719068	0.00351854	0.00447618	0.00265633
41.0156	0.00025451	0.00195953	0.000107394	0.00102937	41.0156	0.00272648	0.00849919	0.00390672	0.00610419	41.0156	0.00157524	0.00264109	0.000670243	0.00240628
42.9688	0.000981796	0.00123104	0.000872426	0.000580036	42.9688	0.00138618	0.00142536	0.00127506	0.0015144	42.9688	0.000839895	0.00182492	0.000671734	0.00118367
44.9219	0.000446536	0.000333851	0.000357436	0.000276185	44.9219	0.000526805	0.000817677	0.000507467	0.000766189	44.9219	0.00131262	0.00153104	0.000793012	0.00157662
46.875	0.000372699	0.000432526	0.000217304	0.000219465	46.875	0.000221927	0.000595506	0.000129977	0.00052089	46.875	0.00075636	0.00159417	0.000786729	0.0018853
48.8281	0.000126336	0.000284249	0.000153583	0.00037583	48.8281	0.00050735	0.000611889	0.000671258	0.000507817	48.8281	0.00079697	0.00136405	0.000964378	0.00166217
50.7813	6.2327e-05	0.000100719	1.86566e-05	7.8334e-05	50.7813	0.000143126	0.00026256	0.000151505	0.000103027	50.7813	0.00023166	0.000600757	0.000374425	0.00093119
52.7344	5.01315e-05	0.000223305	2.33959e-05	0.000210737	52.7344	0.000250306	0.00059569	0.000271396	0.000316811	52.7344	0.000753798	0.00129217	0.000606898	0.00114456
54.6875	0.000225737	0.000466089	0.000264076	0.000256206	54.6875	8.52837e-05	0.000835317	6.31116e-05	0.00119964	54.6875	0.000935433	0.00160007	0.00107406	0.00179709
56.6406	0.000311849	0.000323629	0.000248925	0.000126134	56.6406	0.00128962	0.000706087	0.00185959	0.000804098	56.6406	0.000450914	0.000825075	0.00025051	0.000690532
KOL
freq.[Hz]	KOCortex	KOHippo	Cortex SD	Hippo SD
0	0.0117791	0.0289435	0.00340048	0.0023994
1.95313	0.0567468	0.0934498	0.0187504	0.0105973
3.90625	0.31598	0.328834	0.0729475	0.0808631
5.85938	0.140123	0.306581	0.0309719	0.105586
7.8125	0.143523	0.315419	0.0228712	0.0425541
9.76563	0.0330022	0.0798458	0.00854101	0.0200124
11.7188	0.0558511	0.181306	0.0192184	0.0517668
13.6719	0.0729194	0.139252	0.0198064	0.0466948
15.625	0.0486598	0.0915735	0.00354025	0.0139366
17.5781	0.0640376	0.184886	0.0243661	0.0773087
19.5313	0.0542192	0.0543953	0.0147626	0.0090013
21.4844	0.0245266	0.078994	0.0068963	0.0359204
23.4375	0.0274331	0.0962031	0.00134896	0.0284759
25.3906	0.0133179	0.0697905	0.00362858	0.0206062
27.3438	0.0110766	0.0126225	0.000763754	0.000597298
29.2969	0.0141317	0.0497278	0.00372783	0.0132491
31.25	0.0118008	0.020684	0.00299856	0.00466898
33.2031	0.00387265	0.00843616	0.0010702	0.00250951
35.1563	0.00317176	0.00655789	0.000989653	0.0013995
37.1094	0.00343384	0.00856929	0.000335803	0.00121651
39.0625	0.00501025	0.00674972	0.00100812	0.00129853
41.0156	0.00151874	0.0043666	0.000412317	0.00119837
42.9688	0.00106929	0.00149377	9.44855e-05	0.000100931
44.9219	0.000761988	0.000894188	0.000159517	0.00020075
46.875	0.000450329	0.000874068	9.1848e-05	0.000209643
48.8281	0.000476885	0.000753398	0.000112118	0.000184546
50.7813	0.000145704	0.000321346	2.82319e-05	8.50498e-05
52.7344	0.000351412	0.000703721	0.000120855	0.000180853
54.6875	0.000415485	0.00096716	0.000151911	0.000192792
56.6406	0.000684128	0.000618264	0.000176321	8.7335e-05

## Sheet: REST - WT&KO result
freq.[Hz]	WTCortex	WTHippo	KOCortex	KOHippo	Cortex SE	Hippo SE	Cortex SE	Hippo SE
0	0.00323922	0.00790357	0.0117791	0.0289435	0.000894239	0.000835547	0.00340048	0.0023994
1.95313	0.0223395	0.0576279	0.0567468	0.0934498	0.00502898	0.0100308	0.0187504	0.0105973
3.90625	0.0125147	0.0493305	0.31598	0.328834	0.000614177	0.00666115	0.0729475	0.0808631
5.85938	0.0246101	0.123112	0.140123	0.306581	0.00564291	0.0119956	0.0309719	0.105586
7.8125	0.0163389	0.123164	0.143523	0.315419	0.00357748	0.0080466	0.0228712	0.0425541
9.76563	0.0102379	0.0825538	0.0330022	0.0798458	0.00270217	0.0125451	0.00854101	0.0200124
11.7188	0.00688132	0.0445834	0.0558511	0.181306	0.00140068	0.0122973	0.0192184	0.0517668
13.6719	0.0228921	0.159653	0.0729194	0.139252	0.00573546	0.0300729	0.0198064	0.0466948
15.625	0.0108614	0.0509609	0.0486598	0.0915735	0.00193628	0.00815272	0.00354025	0.0139366
17.5781	0.0076869	0.0383474	0.0640376	0.184886	0.000705195	0.0093993	0.0243661	0.0773087
19.5313	0.00629747	0.0568716	0.0542192	0.0543953	0.000674961	0.000676754	0.0147626	0.0090013
21.4844	0.00399053	0.0511569	0.0245266	0.078994	0.000499778	0.00536385	0.0068963	0.0359204
23.4375	0.00306192	0.0443328	0.0274331	0.0962031	0.000565167	0.00233595	0.00134896	0.0284759
25.3906	0.00967995	0.0581489	0.0133179	0.0697905	0.00232686	0.0139563	0.00362858	0.0206062
27.3438	0.00390196	0.0274788	0.0110766	0.0126225	0.000758868	0.00409294	0.000763754	0.000597298
29.2969	0.00397331	0.0224987	0.0141317	0.0497278	0.00196892	0.00572807	0.00372783	0.0132491
31.25	0.00348174	0.0205605	0.0118008	0.020684	0.000856079	0.00371531	0.00299856	0.00466898
33.2031	0.00429471	0.030677	0.00387265	0.00843616	0.0013486	0.00857373	0.0010702	0.00250951
35.1563	0.00178513	0.013485	0.00317176	0.00655789	0.000441548	0.000821131	0.000989653	0.0013995
37.1094	0.00162749	0.014125	0.00343384	0.00856929	0.000453919	0.00293676	0.000335803	0.00121651
39.0625	0.00213259	0.00837596	0.00501025	0.00674972	0.000522258	0.00280787	0.00100812	0.00129853
41.0156	0.00118689	0.00489993	0.00151874	0.0043666	0.00042844	0.00069452	0.000412317	0.00119837
42.9688	0.000767547	0.00222438	0.00106929	0.00149377	0.000142049	0.000490952	9.44855e-05	0.000100931
44.9219	0.00065182	0.00231847	0.000761988	0.000894188	0.000237885	0.000377583	0.000159517	0.00020075
46.875	0.000427258	0.00121664	0.000450329	0.000874068	0.000147783	0.000279877	9.1848e-05	0.000209643
48.8281	0.000732053	0.00141544	0.000476885	0.000753398	0.000278869	0.000588516	0.000112118	0.000184546
50.7813	0.000768486	0.00225471	0.000145704	0.000321346	6.44184e-05	0.000303621	2.82319e-05	8.50498e-05
52.7344	0.000641448	0.00173974	0.000351412	0.000703721	0.000151015	0.000461292	0.000120855	0.000180853
54.6875	0.000830412	0.00137126	0.000415485	0.00096716	0.000319409	0.000542999	0.000151911	0.000192792
56.6406	0.000898226	0.0022767	0.000684128	0.000618264	0.000342979	0.000465506	0.000176321	8.7335e-05
