# Supplementary material for: KIF2A regulates the development of dentate granule cells and postnatal hippocampal wiring
Source: eLife. 2018 Jan 9;7:e30935. doi: 10.7554/eLife.30935 (PMC5811213; doi:10.7554/eLife.30935)
Supplement: Figure 2—source data 2. [file elife-30935-fig2-data2.xlsx]

## Sheet: 2K
120526-0728		latency (ms)	lasted (sec)		cKO	WT	cKO
exp001	slice1	1.07	1.225	latency	1.40978	0	0.182986
		1.05	1.221	lasted	0.932622	0	0.112444
		1.06	1.272
	slice2	1.4	1.034
		1.48	1.078
		1.37	1.052
	slice3	1.42	0.756
		1.5	1.074
		1.44	1.022
exp002	slice1	1.71	0.823
		1.65	0.878
		1.66	0.844
	slice2	1.43	0.929
		1.48	0.978
		1.37	0.947
	slice3	1.42	0.898
		1.5	0.864
		1.64	0.877
exp003	slice1	1.44	0.752
		1.45	0.799
		1.46	0.784
	slice2	1.5	0.933
		1.48	0.938
		1.47	0.935
	slice3	1.32	0.927
		1.3	0.913
		1.24	0.942
exp004	slice1	1.41	0.834
		1.37	0.912
		1.44	0.981
	slice2	1.05	0.894
		1.19	0.878
		1.08	0.849
	slice3	1.75	0.824
		1.65	0.989
		1.68	0.961
exp005	slice1	1.46	0.94
		1.46	0.922
		1.52	0.914
	slice2	1.14	0.937
		1.17	0.956
		1.24	0.915
	slice3	1.48	0.869
		1.52	0.824
		1.52	0.874
