# Supplementary material for: KIF2A regulates the development of dentate granule cells and postnatal hippocampal wiring
Source: eLife. 2018 Jan 9;7:e30935. doi: 10.7554/eLife.30935 (PMC5811213; doi:10.7554/eLife.30935)
Supplement: Figure 3—source data 1. [file elife-30935-fig3-data1.xlsx]

## Sheet: exp01no2
	WTr	WTg	KOr	KOg			WTr	WTg	KOr	KOg
Mean	5.222	9.72	7.218	11.627		Mean	11.6688	12.2692	16.8165	13.2714
SD	18.298	10.009	29.019	9.027		SD	15.088	6.69363	24.2428	6.40815
	r t.tes(2,2)	0.53	g t.test(2,2)	0.237			r t.tes(2,2)	0.051775	g t.test(2,2)	0.36503
N	133	65	113	78		N	133	65	113	78
p(N<0)	0.346	0.108	0.345	0.064		p(N<0)	0	0	0	0
	-8.45	-12.31	-24.21	-17.73			8.45	12.31	24.21	17.73
	-6.35	-3.21	-4.13	-13.58			6.35	3.21	4.13	13.58
	-25.65	-2.36	-21.44	-11.02			25.65	2.36	21.44	11.02
	-5.38	-19.51	-24.24	-13.78			5.38	19.51	24.24	13.78
	-6.17	-20.18	-8.96	-8.04			6.17	20.18	8.96	8.04
	-13.69	-21.17	-11.26	14.32			13.69	21.17	11.26	14.32
	-9.95	-4.12	-9.59	19.73			9.95	4.12	9.59	19.73
	-5.22	31.46	-30.37	4.33			5.22	31.46	30.37	4.33
	-4.86	6.67	-13.07	2.28			4.86	6.67	13.07	2.28
	-10.54	4.86	-7.91	23.3			10.54	4.86	7.91	23.3
	-23.93	8.45	-14.19	6			23.93	8.45	14.19	6
	-6.85	8.44	-5.68	7.3			6.85	8.44	5.68	7.3
	-14.27	7.46	-6.75	9.3			14.27	7.46	6.75	9.3
	-13.22	18.72	-6.87	7.37			13.22	18.72	6.87	7.37
	-3.73	8.34	-34.69	17.03			3.73	8.34	34.69	17.03
	-4.22	7.55	-3.39	5.32			4.22	7.55	3.39	5.32
	-1.58	8.06	-11.27	6.35			1.58	8.06	11.27	6.35
	-3.73	8.44	-12.52	6.2			3.73	8.44	12.52	6.2
	-5.19	5.27	-6.99	16.44			5.19	5.27	6.99	16.44
	-7.38	8.98	-9.84	16.01			7.38	8.98	9.84	16.01
	-6.17	8.84	-9.13	7.31			6.17	8.84	9.13	7.31
	-4.22	8.5	-9.22	5.95			4.22	8.5	9.22	5.95
	-5.8	7.91	-7.78	11.09			5.8	7.91	7.78	11.09
	-7.4	7.38	-20.35	10.58			7.4	7.38	20.35	10.58
	-5.19	11.51	-7.34	15.93			5.19	11.51	7.34	15.93
	-2.36	23.4	-13.8	24.72			2.36	23.4	13.8	24.72
	-71.47	7.34	-3.8	9.22			71.47	7.34	3.8	9.22
	-15.73	6.35	-15.94	21.22			15.73	6.35	15.94	21.22
	-5.5	19.85	-5.22	5.49			5.5	19.85	5.22	5.49
	-5.8	6.87	-13.44	7.35			5.8	6.87	13.44	7.35
	-20.28	16.38	-9.39	4.2			20.28	16.38	9.39	4.2
	-7.84	6.52	-10.5	22.84			7.84	6.52	10.5	22.84
	-7.68	12.67	-7.55	10.04			7.68	12.67	7.55	10.04
	-6.75	14.19	-55.17	9.3			6.75	14.19	55.17	9.3
	-10.46	14.69	-11.38	10.94			10.46	14.69	11.38	10.94
	-6.61	9.55	-11.32	19.74			6.61	9.55	11.32	19.74
	-3.21	7.34	-6.52	7.81			3.21	7.34	6.52	7.81
	-6.01	2.24	-3.73	6.9			6.01	2.24	3.73	6.9
	-5.3	17.02	-33.35	14.46			5.3	17.02	33.35	14.46
	-7.4	10	2.88	9.39			7.4	10	2.88	9.39
	-11.17	16.55	2.33	15.57			11.17	16.55	2.33	15.57
	-7.4	4.74	2.04	16.21			7.4	4.74	2.04	16.21
	-6.85	15.37	4.56	11.56			6.85	15.37	4.56	11.56
	-4.86	8.5	9.18	21.08			4.86	8.5	9.18	21.08
	-4.25	28.9	4.2	16.41			4.25	28.9	4.2	16.41
	-2.64	23.27	9.23	10.15			2.64	23.27	9.23	10.15
	19.1	21.35	7.75	17.53			19.1	21.35	7.75	17.53
	4.25	13.02	6.38	26.41			4.25	13.02	6.38	26.41
	4.86	6.52	14.85	14.62			4.86	6.52	14.85	14.62
	4.74	2.64	10.84	5.7			4.74	2.64	10.84	5.7
	6.35	7.07	3.65	8.19			6.35	7.07	3.65	8.19
	6.67	25.44	4.13	15.58			6.67	25.44	4.13	15.58
	10.54	17.17	5.1	22.9			10.54	17.17	5.1	22.9
	4.74	10.87	1.82	21.87			4.74	10.87	1.82	21.87
	13.02	16.88	7.75	22.39			13.02	16.88	7.75	22.39
	23.06	22.52	7.77	13.91			23.06	22.52	7.77	13.91
	9.69	8.03	5.95	12.22			9.69	8.03	5.95	12.22
	2.84	11.01	6	12.24			2.84	11.01	6	12.24
	8.69	20.72	17.48	11.05			8.69	20.72	17.48	11.05
	6.41	17.52	7.75	16.55			6.41	17.52	7.75	16.55
	2.69	12.53	5.2	6.37			2.69	12.53	5.2	6.37
	3.69	12.17	7.96	15.67			3.69	12.17	7.96	15.67
	5.89	11.27	23.71	21.01			5.89	11.27	23.71	21.01
	3.69	14.85	5.47	18.9			3.69	14.85	5.47	18.9
	4.74	14.48	10.12	31.15			4.74	14.48	10.12	31.15
	5.82		6.86	18.7			5.82		6.86	18.7
	6.41		11.48	11.08			6.41		11.48	11.08
	10.02		87.68	4.54			10.02		87.68	4.54
	9.55		71.98	24.46			9.55		71.98	24.46
	8.44		93.93	10.18			8.44		93.93	10.18
	11.27		104	23.16			11.27		104	23.16
	6.17		9.34	15.58			6.17		9.34	15.58
	2.64		10.35	15.73			2.64		10.35	15.73
	4.25		95.68	18.9			4.25		95.68	18.9
	4.72		48.14	9.21			4.72		48.14	9.21
	8.45		6.61	4.54			8.45		6.61	4.54
	11.08		162.83	9.72			11.08		162.83	9.72
	4.77		22.72	4.22			4.77		22.72	4.22
	2.64		19.85				2.64		19.85
	4.74		5.82				4.74		5.82
	10.24		13.84				10.24		13.84
	4.22		11.17				4.22		11.17
	3.84		6.37				3.84		6.37
	95.67		3.84				95.67		3.84
	97.57		7.98				97.57		7.98
	72.29		9.51				72.29		9.51
	6.33		91.75				6.33		91.75
	5.27		9.34				5.27		9.34
	11.38		13.51				11.38		13.51
	4.77		13.18				4.77		13.18
	17		7.84				17		7.84
	9.9		6.93				9.9		6.93
	11.57		10.18				11.57		10.18
	3.73		9.21				3.73		9.21
	4.25		27.11				4.25		27.11
	4.77		15.86				4.77		15.86
	5.68		5				5.68		5
	29.85		17.21				29.85		17.21
	18.44		10.38				18.44		10.38
	10.87		8.05				10.87		8.05
	11.51		11.85				11.51		11.85
	20.01		11.21				20.01		11.21
	4.25		7.55				4.25		7.55
	5.7		4.5				5.7		4.5
	5.3		19.24				5.3		19.24
	60.1		7.34				60.1		7.34
	45.18		5.7				45.18		5.7
	19.68		6.15				19.68		6.15
	9.5		10.87				9.5		10.87
	13.96		7.34				13.96		7.34
	9.5		14.91				9.5		14.91
	8.52		5.3				8.52		5.3
	10.56		16.38				10.56		16.38
	16.28						16.28
	6.15						6.15
	13.51						13.51
	6.33						6.33
	2.69						2.69
	11.38						11.38
	11.65						11.65
	5.68						5.68
	8.44						8.44
	14.19						14.19
	11.01						11.01
	20.47						20.47
	10.24						10.24
	10						10
	10.24						10.24
	26.68						26.68
	5.38						5.38
	15.96						15.96
	11.52						11.52
	7.4						7.4

## Sheet: exp02no1
	WTr	WTg	KOr	KOg			WTr	WTg	KOr	KOg
Mean	6.53357	2.17032	4.96808	7.76933		Mean	15.4946	17.6987	13.8899	16.62
SD	18.3321	20.9619	16.8649	21.4497		SD	11.804	11.5331	10.8237	15.6753
	r t.test(2,2)	0.444418	g t.test(2,2)	0.0805512			r t.test(2,2)	0.211253	g t.test(2,2)	0.572369
N	110	62	120	65		N	110	62	120	65
p(N<0)	0.436364	0.354839	0.333333	0.553846		p(N<0)	0	0	0	0
	-3.21	-9	-10.03	-17.93			3.21	9	10.03	17.93
	-9.51	-11.89	-10.6	-37.02			9.51	11.89	10.6	37.02
	-9.49	-48.58	-8.5	-5.7			9.49	48.58	8.5	5.7
	-4.25	-22.61	-25.31	-36.04			4.25	22.61	25.31	36.04
	-9.51	-12.97	-11.6	-10.55			9.51	12.97	11.6	10.55
	-9.34	-15.71	-18.05	-47.18			9.34	15.71	18.05	47.18
	-31.18	-25.16	-33.49	-30.35			31.18	25.16	33.49	30.35
	-9.22	-52.97	-29.57	-10.55			9.22	52.97	29.57	10.55
	-38.04	-19.61	-3.21	-33.22			38.04	19.61	3.21	33.22
	-37.03	-11.05	-10.02	-65.22			37.03	11.05	10.02	65.22
	-13.52	-25.46	-10.56	-13.28			13.52	25.46	10.56	13.28
	-10.91	-28.45	-12.14	-40.24			10.91	28.45	12.14	40.24
	-18.46	-9.14	-21.18	-8.7			18.46	9.14	21.18	8.7
	-65.47	-14.01	-9.21	-14.28			65.47	14.01	9.21	14.28
	-91.09	-18.91	-19.54	-9.03			91.09	18.91	19.54	9.03
	-34.32	-62.63	-11.9	-34.68			34.32	62.63	11.9	34.68
	-15.96	-41.51	-16.38	-20.99			15.96	41.51	16.38	20.99
	-7.48	-10.06	-51.54	-22.3			7.48	10.06	51.54	22.3
	-8.1	-13.74	-4.22	-42.34			8.1	13.74	4.22	42.34
	-15.91	-12.89	-16.98	-5.9			15.91	12.89	16.98	5.9
	-41	-6.55	-6.85	-6.15			41	6.55	6.85	6.15
	-10.42	-8.48	-6.33	-10.07			10.42	8.48	6.33	10.07
	-9.42	12.34	-16.88	-22.65			9.42	12.34	16.88	22.65
	-18.28	13.72	-3.33	-10.87			18.28	13.72	3.33	10.87
	-9.94	19.44	-4.77	-6.61			9.94	19.44	4.77	6.61
	-9.72	12.93	-5	-6.52			9.72	12.93	5	6.52
	-13.85	9.69	-5.8	-10			13.85	9.69	5.8	10
	-3.85	14.4	-13.84	-8.5			3.85	14.4	13.84	8.5
	-2.85	14.29	-17.93	-8.7			2.85	14.29	17.93	8.7
	-13.97	8.22	-12.93	-21.09			13.97	8.22	12.93	21.09
	-5.92	12.55	-8.52	-9.81			5.92	12.55	8.52	9.81
	-5.32	14.29	-20.99	-21.05			5.32	14.29	20.99	21.05
	-16.91	19.41	-16.04	-9.34			16.91	19.41	16.04	9.34
	-29.49	31.06	-7.34	-9.51			29.49	31.06	7.34	9.51
	-30.55	21.76	-11.12	-33.39			30.55	21.76	11.12	33.39
	-7.35	13.4	-10.24	-30.42			7.35	13.4	10.24	30.42
	-36.28	12.39	-8.52	11.52			36.28	12.39	8.52	11.52
	-14.38	13.23	-6.41	15			14.38	13.23	6.41	15
	-7.48	10.7	-3.73	23.75			7.48	10.7	3.73	23.75
	-8.53	10.06	-14.71	11.52			8.53	10.06	14.71	11.52
	-28.17	12.7	48.79	4.25			28.17	12.7	48.79	4.25
	-15.43	11.83	50.86	6.67			15.43	11.83	50.86	6.67
	-7.43	25.08	7.03	11.27			7.43	25.08	7.03	11.27
	-46.7	15.41	11.27	7.84			46.7	15.41	11.27	7.84
	-21.13	7.06	7.93	15.44			21.13	7.06	7.93	15.44
	-61.1	7.37	13.44	4.35			61.1	7.37	13.44	4.35
	-10.11	9	7.03	8.44			10.11	9	7.03	8.44
	-13.33	27.16	6.85	49.07			13.33	27.16	6.85	49.07
	27.18	20.11	7.38	15.01			27.18	20.11	7.38	15.01
	16.28	6.88	15.83	11.65			16.28	6.88	15.83	11.65
	30.35	22.1	9.51	3.8			30.35	22.1	9.51	3.8
	19.52	36.21	31.79	18.57			19.52	36.21	31.79	18.57
	56.69	29.87	55.95	17.08			56.69	29.87	55.95	17.08
	21.72	15.06	12.5	8.98			21.72	15.06	12.5	8.98
	43.7	22.45	6.85	4.35			43.7	22.45	6.85	4.35
	19.34	13.92	4.51	7.98			19.34	13.92	4.51	7.98
	19.51	21.59	9.49	7.98			19.51	21.59	9.49	7.98
	15.61	25.45	8.58	13.8			15.61	25.45	8.58	13.8
	6.85	7.58	5.82	6.35			6.85	7.58	5.82	6.35
	2.69	4.27	9.51	15.8			2.69	4.27	9.51	15.8
	14.25	6.44	19.86	16.13			14.25	6.44	19.86	16.13
	38.41	4.52	3.69	30.35			38.41	4.52	3.69	30.35
	8.37		8.96	15.61			8.37		8.96	15.61
	34.53		6.41	10.56			34.53		6.41	10.56
	6.63		14.07	14.24			6.63		14.07	14.24
	20.15		10.55	17.96			20.15		10.55	17.96
	21.18		17.84	12.75			21.18		17.84	12.75
	6.44		41.14	31.11			6.44		41.14	31.11
	13.23		9.21	12.68			13.23		9.21	12.68
	13.85		7.4	9.1			13.85		7.4	9.1
	8.1		5.8	40.49			8.1		5.8	40.49
	13.09		7.38	53.78			13.09		7.38	53.78
	11.16		11.12	11.09			11.16		11.12	11.09
	4.49		7.55	14.8			4.49		7.55	14.8
	11.83		10.68	13.72			11.83		10.68	13.72
	19.26		11.12	26.87			19.26		11.12	26.87
	17.59		9.21	20.73			17.59		9.21	20.73
	21.26		24.94	10.86			21.26		24.94	10.86
	6.69		5	9.62			6.69		5	9.62
	7.37		12.31	13.71			7.37		12.31	13.71
	5.92		6.01	4.35			5.92		6.01	4.35
	10.91		10.07	12.65			10.91		10.07	12.65
	30.68		7.68	13.72			30.68		7.68	13.72
	5.45		8.58	8.45			5.45		8.58	8.45
	19.13		12.41	6.35			19.13		12.41	6.35
	10.04		17.4	6.85			10.04		17.4	6.85
	3.74		12.65	6.35			3.74		12.65	6.35
	6.03		16.91	12.75			6.03		16.91	12.75
	5.21		10.36	28.78			5.21		10.36	28.78
	4.88		8.44	11.17			4.88		8.44	11.17
	6.03		12.13	6.37			6.03		12.13	6.37
	10.18		27.14	15.52			10.18		27.14	15.52
	30.32		6.53	8.7			30.32		6.53	8.7
	34.91		8.58	10.03			34.91		8.58	10.03
	17.75		11.71	5.8			17.75		11.71	5.8
	15.27		22.45	12.41			15.27		22.45	12.41
	5.82		9.22	22.37			5.82		9.22	22.37
	21.23		14.07	4.77			21.23		14.07	4.77
	22.76		12.26	6.15			22.76		12.26	6.15
	12.18		13.18	41.74			12.18		13.18	41.74
	5.4		10.6	8.44			5.4		10.6	8.44
	15.96		16.95	9.49			15.96		16.95	9.49
	15.91		9.21	8.96			15.91		9.21	8.96
	10.07		6.15	4.86			10.07		6.15	4.86
	14.97		10.24	13.93			14.97		10.24	13.93
	18.71		19.52	10.68			18.71		19.52	10.68
	10.91		12.67	28.77			10.91		12.67	28.77
	9.89		4.86	12.41			9.89		4.86	12.41
	17.75		65.49	20.37			17.75		65.49	20.37
	20.11		9.43	6.52			20.11		9.43	6.52
	14.25		16.35	10.36			14.25		16.35	10.36
	13.74		8.96	6.41			13.74		8.96	6.41
	3.09		17.93	9.1			3.09		17.93	9.1
	20.15		14.86	9.49			20.15		14.86	9.49
	7.87		15.44	5.38			7.87		15.44	5.38
	12.08		11.32	8.45			12.08		11.32	8.45
	13.23		25.23	12.53			13.23		25.23	12.53
	15.38		21.71	7.55			15.38		21.71	7.55
	11.16		5.61	11.27			11.16		5.61	11.27
	15.86		6.01	16.65			15.86		6.01	16.65
	12.62			8.96			12.62			8.96
	11.23			16.01			11.23			16.01
	14.33			17.4			14.33			17.4
	5.4			12.65			5.4			12.65
	10.91			16.91			10.91			16.91
	3.74			10.36			3.74			10.36
	49.42			124.39			49.42			124.39
	8.28			39.67			8.28			39.67
	11.42			67.31			11.42			67.31
	10.07			12.26			10.07			12.26
	14.4			18.51			14.4			18.51
	21.3			5.68			21.3			5.68
	13.09			17.68			13.09			17.68
	11.83			6.87			11.83			6.87
	8.48			11.61			8.48			11.61
	3.85			13.44			3.85			13.44
	7.1			8.84			7.1			8.84
	11.16			39.55			11.16			39.55
	10.28			9.85			10.28			9.85
	6.78			8.05			6.78			8.05
	27.84			10.68			27.84			10.68
	25.61			10.36			25.61			10.36
	6.88			21.72			6.88			21.72
	37.23			9.85			37.23			9.85
	12.89			6.17			12.89			6.17
	12.31			7.68			12.31			7.68
	14.4			11.85			14.4			11.85
	30.33			14.51			30.33			14.51
	10.9			11.79			10.9			11.79
	19.76			10.68			19.76			10.68
	13.85			3.16			13.85			3.16
	14.25			17.46			14.25			17.46
	14.25			9.69			14.25			9.69
	10.28			9.21			10.28			9.21
	7.52			10.61			7.52			10.61
	19.17			7.55			19.17			7.55
	14.29			13.68			14.29			13.68
	6.69			11.01			6.69			11.01
	10.51			13.75			10.51			13.75
	9.99			7.07			9.99			7.07
	10.42			11.01			10.42			11.01
	9.24			72.27			9.24			72.27
	25.56			79.42			25.56			79.42
	9.11			3.73			9.11			3.73
	14.7			7.68			14.7			7.68
	13.74						13.74
	5.82						5.82
	22.31						22.31
	3.85						3.85
	11.21						11.21
	6.37						6.37
	7.94						7.94
	28.21						28.21
	29.17						29.17
	31.47						31.47
	12.8						12.8
	8.55						8.55
	9						9
	9.04						9.04
	4.88						4.88
	15.41						15.41
	4.52						4.52
	11.13						11.13
	16.97						16.97
	14.4						14.4
	9.54						9.54
	10.4						10.4
	8.37						8.37
	9.24						9.24
	8.01						8.01
	23.67						23.67
	21.23						21.23
	13.09						13.09
	10.55						10.55
	6.44						6.44
	18.59						18.59
	4.23						4.23
	9.73						9.73
	9.01						9.01
	11.21						11.21
	9.38						9.38
	8.87						8.87
	14.9						14.9
	12.58						12.58
	4.73						4.73
	13.24						13.24
	13.61						13.61
	23.44						23.44
	8.76						8.76
	7.43						7.43

## Sheet: exp03no1
	WTr	WTg	KOr	KOg			WTr	WTg	KOr	KOg
Mean	8.11444	6.06217	5.57899	4.16087		Mean	12.7378	16.7571	10.739	15.9252
SD	12.9225	20.0876	11.2701	20.7297		SD	8.5814	13.3987	6.47724	11.7788
	r t.test(2,2)	0.112	g t.test(2,2)	0.539			r t.test(2,2)	0.0722631	g t.test(2,2)	0.807472
N	151	83	131	92		N	151	83	131	92
p(<0)	0.145695	0.277108	0.152672	0.304348		p(<0)	0	0	0	0
	-33.33	-8.76	-15.96	-16.44			33.33	8.76	15.96	16.44
	-22.1	-10.18	-12.31	-11.56			22.1	10.18	12.31	11.56
	-20.33	-13.49	-18	-8.37			20.33	13.49	18	8.37
	-4.99	-6.37	-11.33	-6.78			4.99	6.37	11.33	6.78
	-21.13	-14.82	-11.4	-22.53			21.13	14.82	11.4	22.53
	-7.94	-18.41	-16.12	-13.27			7.94	18.41	16.12	13.27
	-14.64	-16.34	-31.71	-17.53			14.64	16.34	31.71	17.53
	-6.46	-52.29	-7.1	-41.12			6.46	52.29	7.1	41.12
	-25.67	-57.61	-12.36	-7.37			25.67	57.61	12.36	7.37
	-24.06	-55.4	-7.87	-17.53			24.06	55.4	7.87	17.53
	-51.05	-21.43	-9.24	-57.25			51.05	21.43	9.24	57.25
	-7.94	-28.23	-13.09	-6.03			7.94	28.23	13.09	6.03
	-24.44	-9.73	-7.48	-12.07			24.44	9.73	7.48	12.07
	-8.53	-16.97	-8.81	-13.97			8.53	16.97	8.81	13.97
	-8.53	-20.26	-7.58	-64.14			8.53	20.26	7.58	64.14
	-6.39	-19.67	-12.39	-20.96			6.39	19.67	12.39	20.96
	-10.58	-10.44	-8.37	-24.81			10.58	10.44	8.37	24.81
	-9.24	-13.73	-12.36	-68.05			9.24	13.73	12.36	68.05
	-11.4	-5.99	-15.64	-3.35			11.4	5.99	15.64	3.35
	-6.96	-10.06	-16.3	-9.26			6.96	10.06	16.3	9.26
	-10.06	-4.88	57.17	-8.48			10.06	4.88	57.17	8.48
	-9.01	-6.17	7.37	-15.14			9.01	6.17	7.37	15.14
	26.78	-7.43	7.94	-37.01			26.78	7.43	7.94	37.01
	16.07	18.77	6.88	-25.3			16.07	18.77	6.88	25.3
	4.23	12.97	14.91	-7.87			4.23	12.97	14.91	7.87
	19.92	8.73	14.2	-6.55			19.92	8.73	14.2	6.55
	10.4	11.13	11.31	-14.9			10.4	11.13	11.31	14.9
	7.06	42.02	10.4	-9.24			7.06	42.02	10.4	9.24
	3.55	65.72	5.92	28.7			3.55	65.72	5.92	28.7
	11.64	23.96	7.06	12.17			11.64	23.96	7.06	12.17
	9.26	20.76	4.27	12.8			9.26	20.76	4.27	12.8
	5.85	20.67	8.27	28.4			5.85	20.67	8.27	28.4
	15.43	23.92	10.91	32.23			15.43	23.92	10.91	32.23
	4.49	12.88	11.13	22.63			4.49	12.88	11.13	22.63
	16.42	54.49	6.63	9.76			16.42	54.49	6.63	9.76
	9.58	18.52	7.94	23.44			9.58	18.52	7.94	23.44
	34.5	19.12	9	10.6			34.5	19.12	9	10.6
	16.71	6.37	5.02	9.84			16.71	6.37	5.02	9.84
	14.82	46.19	22.17	11.01			14.82	46.19	22.17	11.01
	6.37	7.43	9.76	12.36			6.37	7.43	9.76	12.36
	11.13	17.59	8.87	14.38			11.13	17.59	8.87	14.38
	24.65	3.7	6.55	10.55			24.65	3.7	6.55	10.55
	10.07	14.45	8.62	19.24			10.07	14.45	8.62	19.24
	8.76	10.07	3.74	12.7			8.76	10.07	3.74	12.7
	16.23	6.63	7.94	11.45			16.23	6.63	7.94	11.45
	9.01	8.28	5.29	18.03			9.01	8.28	5.29	18.03
	11.13	26.99	14.29	23.2			11.13	26.99	14.29	23.2
	16.57	31.27	10.64	21.33			16.57	31.27	10.64	21.33
	3.22	21.07	7.87	10.51			3.22	21.07	7.87	10.51
	4.27	11.25	6.03	10.04			4.27	11.25	6.03	10.04
	10.7	16.3	9.84	15.57			10.7	16.3	9.84	15.57
	19.65	11.05	13.27	6.96			19.65	11.05	13.27	6.96
	21.82	16.12	8.22	6.9			21.82	16.12	8.22	6.9
	9.47	13.8	8.01	10.06			9.47	13.8	8.01	10.06
	6.88	10.72	11.33	8.37			6.88	10.72	11.33	8.37
	5.92	4.36	7.1	22.1			5.92	4.36	7.1	22.1
	11.69	13.85	10.42	11.33			11.69	13.85	10.42	11.33
	9.66	10.11	10.11	9.73			9.66	10.11	10.11	9.73
	5.4	7.48	10.72	8.28			5.4	7.48	10.72	8.28
	12	5.7	7.35	8.01			12	5.7	7.35	8.01
	6.44	10.72	10.18	13.33			6.44	10.72	10.18	13.33
	59.85	10.48	6.19	14.97			59.85	10.48	6.19	14.97
	8.73	9.14	8.53	5.02			8.73	9.14	8.53	5.02
	13.57	4.76	5.29	18.43			13.57	4.76	5.29	18.43
	19.97	4.27	6.88	11.4			19.97	4.27	6.88	11.4
	12.08	4.23	5.92	10.9			12.08	4.23	5.92	10.9
	8.62	17.41	8.47	13.23			8.62	17.41	8.47	13.23
	11.16	11.11	7.41	11.83			11.16	11.11	7.41	11.83
	6.88	19.06	8.22	9.66			6.88	19.06	8.22	9.66
	9.76	14.33	10.91	10.28			9.76	14.33	10.91	10.28
	12.88	7.43	16.81	12.39			12.88	7.43	16.81	12.39
	10.28	12.97	13.23	9.54			10.28	12.97	13.23	9.54
	17.78	8.1	15.41	5.7			17.78	8.1	15.41	5.7
	6.39	7.06	8.27	9.24			6.39	7.06	8.27	9.24
	6.03	11.69	11.31	17.66			6.03	11.69	11.31	17.66
	31.97	28.09	11.69	7.94			31.97	28.09	11.69	7.94
	11.75	6.35	9.11	11.4			11.75	6.35	9.11	11.4
	6.17	10.79	11.36	37.54			6.17	10.79	11.36	37.54
	10.28	6.9	17.28	11.61			10.28	6.9	17.28	11.61
	26.95	12.88	8.62	10.42			26.95	12.88	8.62	10.42
	5.92	11.4	4.55	18.79			5.92	11.4	4.55	18.79
	15.79	16.81	5.7	6.37			15.79	16.81	5.7	6.37
	12.58	11.4	13.49	19.95			12.58	11.4	13.49	19.95
	6.37		22.06	9.47			6.37		22.06	9.47
	1.67		7.41	18.06			1.67		7.41	18.06
	6.88		8.55	4.88			6.88		8.55	4.88
	15.96		8.48	39.52			15.96		8.48	39.52
	10.91		9.76	6.44			10.91		9.76	6.44
	9.01		8.55	6.03			9.01		8.55	6.03
	9.01		18.35	9			9.01		18.35	9
	33.53		5.02	14.06			33.53		5.02	14.06
	8.01		4.13	71.94			8.01		4.13	71.94
	11.23		19.52				11.23		19.52
	12.72		9				12.72		9
	11.89		13.8				11.89		13.8
	10.72		7.63				10.72		7.63
	7.94		9.14				7.94		9.14
	13.24		4.76				13.24		4.76
	6.44		12.28				6.44		12.28
	24.29						24.29
	11.69						11.69
	13.57						13.57
	8.22						8.22
	9.14						9.14
	11.64						11.64
	26.72						26.72
	2.7						2.7
	9						9
	6.63						6.63
	9.76						9.76
	11.61						11.61
	5.21						5.21
	16.54						16.54
	6.69						6.69
	4.79						4.79
	5.53						5.53
	7.35						7.35
	7.87						7.87
	14.25						14.25
	8.62						8.62
	5.92						5.92
	9.73						9.73
	11.69						11.69
	21.7						21.7
	7.41						7.41
	12.36						12.36
	8.22						8.22
	10.6						10.6
	8.01						8.01
	7.43						7.43
	7.43						7.43
	8.47						8.47
	9.54						9.54
	11.13						11.13
	32.3						32.3
	20.03						20.03
	31.86						31.86
	9.14						9.14
	15.91						15.91
	11.66						11.66
	9.54						9.54
	13.98						13.98
	11.4						11.4
	8.62						8.62
	7.63						7.63
	15.64						15.64
	16.94						16.94
	12.36						12.36
	7.2						7.2
	8.37						8.37
	7.35						7.35

## Sheet: ResultB
	CldU	IdU
WT	70	131
cKO	78.3	121.3
	11.35	20.55
	13.5	9.07
	WTCldU	cKOCldU	WTIdU	cKOIdU
	65	78	133	113
	62	65	110	120
	83	92	151	131
	0.459272		0.483719

## Sheet: ResultI
exp01no2	r=red g=green							WTr	WTg	KOr	KOg		average	WT	cKO		CldU(+)	IdU(+)
	WTr	WTg	KOr	KOg			Mean	14.058	15.6133	13.9464	15.2984		CldU(+)	15.6133	15.2984	WT	15.6133	14.058
Mean	11.6688	12.2692	16.8165	13.2714			SD	12.9007	11.2566	16.1026	12.6099		IdU(+)	14.058	13.9464	cKO	15.2984	13.9464
SD	15.088	6.69363	24.2428	6.40815				r t.test(2,2)	0.919223	g t.test(2,2)	0.783758
	r t.test(2,2)	0.051775	g t.test(2,2)	0.36503	n.s.	※welch	N	394	210	364	235		stdev	WT	cKO		CldU(+)	IdU(+)
N	133	65	113	78			p(N<0)	0	0	0	0		CldU(+)	11.2566	12.6099	WT	11.2566	12.9007
p(N<0)	0.346	0.108	0.345	0.064				8.45	12.31	24.21	17.73		IdU(+)	12.9007	16.1026	cKO	12.6099	16.1026
exp02no1								6.35	3.21	4.13	13.58
	WTr	WTg	KOr	KOg				25.65	2.36	21.44	11.02		average	WT	cKO	average	CldU(+)	IdU(+)
Mean	15.4946	17.6987	13.8899	16.62				5.38	19.51	24.24	13.78		CldU(+)	13.8152	15.2722	WT	13.8152	13.3004
SD	11.804	11.5331	10.8237	15.6753				6.17	20.18	8.96	8.04		IdU(+)	13.3004	15.575	cKO	15.2722	15.575
	r t.test(2,2)	0.211253	gt.test(2,2)	0.572369	n.s.			13.69	21.17	11.26	14.32
N	110	62	120	65				9.95	4.12	9.59	19.73		SEM	WT	cKO	SEM	CldU(+)	IdU(+)
p(N<0)	0	0	0	0				5.22	31.46	30.37	4.33		CldU(+)	3.03947	1.76723	WT	3.03947	1.97399
exp03no1								4.86	6.67	13.07	2.28		IdU(+)	1.97399	2.90135	cKO	1.76723	2.90135
	WTr	WTg	KOr	KOg				10.54	4.86	7.91	23.3
Mean	12.7378	16.7571	10.739	15.9252				23.93	8.45	14.19	6
SD	8.5814	13.3987	6.47724	11.7788				6.85	8.44	5.68	7.3
	rt.test(2,2)	0.0722631	g t.test(2,2)	0.807472	n.s.			14.27	7.46	6.75	9.3
N	151	83	131	92				13.22	18.72	6.87	7.37
p(<0)	0	0	0	0				3.73	8.34	34.69	17.03
	WTr	WTg	KOr	KOg				4.22	7.55	3.39	5.32
N	131.333	70	121.333	78.3333	n.s			1.58	8.06	11.27	6.35
	20.5508	11.3578	9.07377	13.5031				3.73	8.44	12.52	6.2
								5.19	5.27	6.99	16.44
Mean	13.3004	15.575	13.8152	15.2722				7.38	8.98	9.84	16.01
	1.97399	2.90135	3.03947	1.76723				6.17	8.84	9.13	7.31
								4.22	8.5	9.22	5.95
Mean	11.6688	12.2692	16.8165	13.2714				5.8	7.91	7.78	11.09
	15.4946	17.6987	13.8899	16.62				7.4	7.38	20.35	10.58
	12.7378	16.7571	10.739	15.9252				5.19	11.51	7.34	15.93
	0.819673	0.886259						2.36	23.4	13.8	24.72
								71.47	7.34	3.8	9.22
								15.73	6.35	15.94	21.22
								5.5	19.85	5.22	5.49
								5.8	6.87	13.44	7.35
								20.28	16.38	9.39	4.2
								7.84	6.52	10.5	22.84
								7.68	12.67	7.55	10.04
								6.75	14.19	55.17	9.3
								10.46	14.69	11.38	10.94
								6.61	9.55	11.32	19.74
								3.21	7.34	6.52	7.81
								6.01	2.24	3.73	6.9
								5.3	17.02	33.35	14.46
								7.4	10	2.88	9.39
								11.17	16.55	2.33	15.57
								7.4	4.74	2.04	16.21
								6.85	15.37	4.56	11.56
								4.86	8.5	9.18	21.08
								4.25	28.9	4.2	16.41
								2.64	23.27	9.23	10.15
								19.1	21.35	7.75	17.53
								4.25	13.02	6.38	26.41
								4.86	6.52	14.85	14.62
								4.74	2.64	10.84	5.7
								6.35	7.07	3.65	8.19
								6.67	25.44	4.13	15.58
								10.54	17.17	5.1	22.9
								4.74	10.87	1.82	21.87
								13.02	16.88	7.75	22.39
								23.06	22.52	7.77	13.91
								9.69	8.03	5.95	12.22
								2.84	11.01	6	12.24
								8.69	20.72	17.48	11.05
								6.41	17.52	7.75	16.55
								2.69	12.53	5.2	6.37
								3.69	12.17	7.96	15.67
								5.89	11.27	23.71	21.01
								3.69	14.85	5.47	18.9
								4.74	14.48	10.12	31.15
								5.82	9	6.86	18.7
								6.41	11.89	11.48	11.08
								10.02	48.58	87.68	4.54
								9.55	22.61	71.98	24.46
								8.44	12.97	93.93	10.18
								11.27	15.71	104	23.16
								6.17	25.16	9.34	15.58
								2.64	52.97	10.35	15.73
								4.25	19.61	95.68	18.9
								4.72	11.05	48.14	9.21
								8.45	25.46	6.61	4.54
								11.08	28.45	162.83	9.72
								4.77	9.14	22.72	4.22
								2.64	14.01	19.85	17.93
								4.74	18.91	5.82	37.02
								10.24	62.63	13.84	5.7
								4.22	41.51	11.17	36.04
								3.84	10.06	6.37	10.55
								95.67	13.74	3.84	47.18
								97.57	12.89	7.98	30.35
								72.29	6.55	9.51	10.55
								6.33	8.48	91.75	33.22
								5.27	12.34	9.34	65.22
								11.38	13.72	13.51	13.28
								4.77	19.44	13.18	40.24
								17	12.93	7.84	8.7
								9.9	9.69	6.93	14.28
								11.57	14.4	10.18	9.03
								3.73	14.29	9.21	34.68
								4.25	8.22	27.11	20.99
								4.77	12.55	15.86	22.3
								5.68	14.29	5	42.34
								29.85	19.41	17.21	5.9
								18.44	31.06	10.38	6.15
								10.87	21.76	8.05	10.07
								11.51	13.4	11.85	22.65
								20.01	12.39	11.21	10.87
								4.25	13.23	7.55	6.61
								5.7	10.7	4.5	6.52
								5.3	10.06	19.24	10
								60.1	12.7	7.34	8.5
								45.18	11.83	5.7	8.7
								19.68	25.08	6.15	21.09
								9.5	15.41	10.87	9.81
								13.96	7.06	7.34	21.05
								9.5	7.37	14.91	9.34
								8.52	9	5.3	9.51
								10.56	27.16	16.38	33.39
								16.28	20.11	10.03	30.42
								6.15	6.88	10.6	11.52
								13.51	22.1	8.5	15
								6.33	36.21	25.31	23.75
								2.69	29.87	11.6	11.52
								11.38	15.06	18.05	4.25
								11.65	22.45	33.49	6.67
								5.68	13.92	29.57	11.27
								8.44	21.59	3.21	7.84
								14.19	25.45	10.02	15.44
								11.01	7.58	10.56	4.35
								20.47	4.27	12.14	8.44
								10.24	6.44	21.18	49.07
								10	4.52	9.21	15.01
								10.24	8.76	19.54	11.65
								26.68	10.18	11.9	3.8
								5.38	13.49	16.38	18.57
								15.96	6.37	51.54	17.08
								11.52	14.82	4.22	8.98
								7.4	18.41	16.98	4.35
								3.21	16.34	6.85	7.98
								9.51	52.29	6.33	7.98
								9.49	57.61	16.88	13.8
								4.25	55.4	3.33	6.35
								9.51	21.43	4.77	15.8
								9.34	28.23	5	16.13
								31.18	9.73	5.8	30.35
								9.22	16.97	13.84	15.61
								38.04	20.26	17.93	10.56
								37.03	19.67	12.93	14.24
								13.52	10.44	8.52	17.96
								10.91	13.73	20.99	12.75
								18.46	5.99	16.04	31.11
								65.47	10.06	7.34	12.68
								91.09	4.88	11.12	9.1
								34.32	6.17	10.24	40.49
								15.96	7.43	8.52	53.78
								7.48	18.77	6.41	11.09
								8.1	12.97	3.73	14.8
								15.91	8.73	14.71	13.72
								41	11.13	48.79	26.87
								10.42	42.02	50.86	20.73
								9.42	65.72	7.03	10.86
								18.28	23.96	11.27	9.62
								9.94	20.76	7.93	13.71
								9.72	20.67	13.44	4.35
								13.85	23.92	7.03	12.65
								3.85	12.88	6.85	13.72
								2.85	54.49	7.38	8.45
								13.97	18.52	15.83	6.35
								5.92	19.12	9.51	6.85
								5.32	6.37	31.79	6.35
								16.91	46.19	55.95	12.75
								29.49	7.43	12.5	28.78
								30.55	17.59	6.85	11.17
								7.35	3.7	4.51	6.37
								36.28	14.45	9.49	15.52
								14.38	10.07	8.58	8.7
								7.48	6.63	5.82	10.03
								8.53	8.28	9.51	5.8
								28.17	26.99	19.86	12.41
								15.43	31.27	3.69	22.37
								7.43	21.07	8.96	4.77
								46.7	11.25	6.41	6.15
								21.13	16.3	14.07	41.74
								61.1	11.05	10.55	8.44
								10.11	16.12	17.84	9.49
								13.33	13.8	41.14	8.96
								27.18	10.72	9.21	4.86
								16.28	4.36	7.4	13.93
								30.35	13.85	5.8	10.68
								19.52	10.11	7.38	28.77
								56.69	7.48	11.12	12.41
								21.72	5.7	7.55	20.37
								43.7	10.72	10.68	6.52
								19.34	10.48	11.12	10.36
								19.51	9.14	9.21	6.41
								15.61	4.76	24.94	9.1
								6.85	4.27	5	9.49
								2.69	4.23	12.31	5.38
								14.25	17.41	6.01	8.45
								38.41	11.11	10.07	12.53
								8.37	19.06	7.68	7.55
								34.53	14.33	8.58	11.27
								6.63	7.43	12.41	16.65
								20.15	12.97	17.4	8.96
								21.18	8.1	12.65	16.01
								6.44	7.06	16.91	17.4
								13.23	11.69	10.36	12.65
								13.85	28.09	8.44	16.91
								8.1	6.35	12.13	10.36
								13.09	10.79	27.14	124.39
								11.16	6.9	6.53	39.67
								4.49	12.88	8.58	67.31
								11.83	11.4	11.71	12.26
								19.26	16.81	22.45	18.51
								17.59	11.4	9.22	5.68
								21.26		14.07	17.68
								6.69		12.26	6.87
								7.37		13.18	11.61
								5.92		10.6	13.44
								10.91		16.95	8.84
								30.68		9.21	39.55
								5.45		6.15	9.85
								19.13		10.24	8.05
								10.04		19.52	10.68
								3.74		12.67	10.36
								6.03		4.86	21.72
								5.21		65.49	9.85
								4.88		9.43	6.17
								6.03		16.35	7.68
								10.18		8.96	11.85
								30.32		17.93	14.51
								34.91		14.86	11.79
								17.75		15.44	10.68
								15.27		11.32	3.16
								5.82		25.23	17.46
								21.23		21.71	9.69
								22.76		5.61	9.21
								12.18		6.01	10.61
								5.4		15.96	7.55
								15.96		12.31	13.68
								15.91		18	11.01
								10.07		11.33	13.75
								14.97		11.4	7.07
								18.71		16.12	11.01
								10.91		31.71	72.27
								9.89		7.1	79.42
								17.75		12.36	3.73
								20.11		7.87	7.68
								14.25		9.24	16.44
								13.74		13.09	11.56
								3.09		7.48	8.37
								20.15		8.81	6.78
								7.87		7.58	22.53
								12.08		12.39	13.27
								13.23		8.37	17.53
								15.38		12.36	41.12
								11.16		15.64	7.37
								15.86		16.3	17.53
								12.62		57.17	57.25
								11.23		7.37	6.03
								14.33		7.94	12.07
								5.4		6.88	13.97
								10.91		14.91	64.14
								3.74		14.2	20.96
								49.42		11.31	24.81
								8.28		10.4	68.05
								11.42		5.92	3.35
								10.07		7.06	9.26
								14.4		4.27	8.48
								21.3		8.27	15.14
								13.09		10.91	37.01
								11.83		11.13	25.3
								8.48		6.63	7.87
								3.85		7.94	6.55
								7.1		9	14.9
								11.16		5.02	9.24
								10.28		22.17	28.7
								6.78		9.76	12.17
								27.84		8.87	12.8
								25.61		6.55	28.4
								6.88		8.62	32.23
								37.23		3.74	22.63
								12.89		7.94	9.76
								12.31		5.29	23.44
								14.4		14.29	10.6
								30.33		10.64	9.84
								10.9		7.87	11.01
								19.76		6.03	12.36
								13.85		9.84	14.38
								14.25		13.27	10.55
								14.25		8.22	19.24
								10.28		8.01	12.7
								7.52		11.33	11.45
								19.17		7.1	18.03
								14.29		10.42	23.2
								6.69		10.11	21.33
								10.51		10.72	10.51
								9.99		7.35	10.04
								10.42		10.18	15.57
								9.24		6.19	6.96
								25.56		8.53	6.9
								9.11		5.29	10.06
								14.7		6.88	8.37
								13.74		5.92	22.1
								5.82		8.47	11.33
								22.31		7.41	9.73
								3.85		8.22	8.28
								11.21		10.91	8.01
								6.37		16.81	13.33
								7.94		13.23	14.97
								28.21		15.41	5.02
								29.17		8.27	18.43
								31.47		11.31	11.4
								12.8		11.69	10.9
								8.55		9.11	13.23
								9		11.36	11.83
								9.04		17.28	9.66
								4.88		8.62	10.28
								15.41		4.55	12.39
								4.52		5.7	9.54
								11.13		13.49	5.7
								16.97		22.06	9.24
								14.4		7.41	17.66
								9.54		8.55	7.94
								10.4		8.48	11.4
								8.37		9.76	37.54
								9.24		8.55	11.61
								8.01		18.35	10.42
								23.67		5.02	18.79
								21.23		4.13	6.37
								13.09		19.52	19.95
								10.55		9	9.47
								6.44		13.8	18.06
								18.59		7.63	4.88
								4.23		9.14	39.52
								9.73		4.76	6.44
								9.01		12.28	6.03
								11.21			9
								9.38			14.06
								8.87			71.94
								14.9
								12.58
								4.73
								13.24
								13.61
								23.44
								8.76
								7.43
								33.33
								22.1
								20.33
								4.99
								21.13
								7.94
								14.64
								6.46
								25.67
								24.06
								51.05
								7.94
								24.44
								8.53
								8.53
								6.39
								10.58
								9.24
								11.4
								6.96
								10.06
								9.01
								26.78
								16.07
								4.23
								19.92
								10.4
								7.06
								3.55
								11.64
								9.26
								5.85
								15.43
								4.49
								16.42
								9.58
								34.5
								16.71
								14.82
								6.37
								11.13
								24.65
								10.07
								8.76
								16.23
								9.01
								11.13
								16.57
								3.22
								4.27
								10.7
								19.65
								21.82
								9.47
								6.88
								5.92
								11.69
								9.66
								5.4
								12
								6.44
								59.85
								8.73
								13.57
								19.97
								12.08
								8.62
								11.16
								6.88
								9.76
								12.88
								10.28
								17.78
								6.39
								6.03
								31.97
								11.75
								6.17
								10.28
								26.95
								5.92
								15.79
								12.58
								6.37
								1.67
								6.88
								15.96
								10.91
								9.01
								9.01
								33.53
								8.01
								11.23
								12.72
								11.89
								10.72
								7.94
								13.24
								6.44
								24.29
								11.69
								13.57
								8.22
								9.14
								11.64
								26.72
								2.7
								9
								6.63
								9.76
								11.61
								5.21
								16.54
								6.69
								4.79
								5.53
								7.35
								7.87
								14.25
								8.62
								5.92
								9.73
								11.69
								21.7
								7.41
								12.36
								8.22
								10.6
								8.01
								7.43
								7.43
								8.47
								9.54
								11.13
								32.3
								20.03
								31.86
								9.14
								15.91
								11.66
								9.54
								13.98
								11.4
								8.62
								7.63
								15.64
								16.94
								12.36
								7.2
								8.37
								7.35
