# Supplementary material for: KIF2A regulates the development of dentate granule cells and postnatal hippocampal wiring
Source: eLife. 2018 Jan 9;7:e30935. doi: 10.7554/eLife.30935 (PMC5811213; doi:10.7554/eLife.30935)
Supplement: Figure 4—figure supplement 1—source data 1. [file elife-30935-fig4-figsupp1-data1.xls]

## Sheet: 4S1E
5wWT	Mean	Mean	Mean	Mean	Mean	5wWTC	Mean	Mean	Mean	Mean	Mean	5wKO	Mean	Mean	Mean	Mean	Mean	5wKOV	Mean	Mean	Mean	Mean	Mean
20x20	203.693	200.579	203.736	200.06	199.351		196.742	194.846	198.042	193.695	190.729		191.334	187.388	189.477	188.752	195.932		191.238	197.692	189.969	187.396	185.956
ImageJ	201.925	198.681	204.497	200.046	200.16		198.479	196.221	197.761	193.403	193.468		192.848	185.331	193.366	190.964	189.138		189.748	196.766	188.104	188.497	186.455
	203.339	201.408	204.936	201.065	199.537		198.618	195.058	195.303	193.659	195.211		192.355	190.093	189.195	189.847	193.453		190.173	191.763	191.779	193.69	187.526
	204.035	200.072	204	198.802	198.788		199.361	193.583	194.246	195.003	193.605		194.778	188.545	188.958	187.08	191.866		188.829	192.148	189.589	192.113	189.148
	204.316	199.682	204.798	199.363	198.894		198.403	193.347	197.377	191.251	193.415		190.7	186.553	183.948	186.948	193.34		191.323	193.102	189.956	191.25	187.262
	198.701	199.628	201.97	194.302	199.483		196.54	196.1	193.643	190.863	192.574		113.153	112.608	112.797	132.832	135.891		106.33	94.516	101.514	86.631	102.37
	199.27	197.807	200.297	195.659	197.123		196.117	193.88	193.173	189.487	191.821		112.315	110.971	108.468	121.087	121.814		110.32	103.782	108.643	100.162	100.011
	202.059	198.413	201.561	196.851	198.13		197.346	192.892	193.042	190.823	193.116		118.467	118.316	120.848	124.334	128.816		108.76	98.308	95.673	96.305	91.963
	202.483	198.449	201.213	195.626	196.067		199.251	193.361	192.83	189.671	191.966		118.528	105.79	121.893	118.114	110.23		99.911	100.778	101.726	94.461	100.47
	199.69	195.882	200.803	197.021	194.466		196.71	189.443	188.658	190.285	194.185		121.692	104.87	113.427	109.393	117.183		103.682	104.815	99.455	92.542	93.542
	196.668	195.328	198.876	193.658	197.429		199.308	197.489	196.629	188.665	196.295		145.458	163.575	154.961	150.195	156.424		143.567	144.894	147.287	140.812	150.778
	201.593	198.712	200.444	194.619	194.299		198.239	196.435	199.284	195.855	194.166		147.407	152.855	155.395	154.164	156.098		140.675	138.85	147.274	137.93	147.396
	200.67	200.332	199.191	194.526	198.582		200.203	195.862	196.106	195.185	190.618		146.418	163.39	156.671	147.402	155.632		141.685	139.407	146.273	138.186	151.23
	200.369	199.552	197.094	194.831	198.116		199.237	195.087	195.974	192.807	196.663		146.065	155.138	155.106	151.232	152.25		153.664	146.351	142.775	135.362	146.811
	196.799	197.496	196.07	193.712	192.74		197.09	192.487	194.36	191.608	191.795		141.767	148.814	143.481	158.506	147.809		153.517	141.713	145.168	134.293	149.758
	178.104	174.629	185.646	174.961	174.579		160.843	148.815	158.552	157.778	159.554		176.196	172.43	188.299	177.175	177.594		173.297	181.467	176.983	172.428	172.301
	180.926	176.253	187.133	178.636	177.962		170.176	153.901	158.968	155.838	163.151		182.037	179.587	176.892	181.691	181.778		173.607	173.544	180.455	167.123	173.495
	183.557	179.109	183.542	167.761	176.059		162.528	153.826	160.931	155.301	158.957		176.429	177.728	175.944	183.605	175.579		170.113	173.786	174.232	179.205	176.554
	178.761	175.782	175.481	173.794	176.307		158.267	148.228	152.063	157.238	167.524		175.547	175.139	175.863	178.408	173.516		169.908	167.83	174.921	170.977	171.672
	175.695	180.087	176.707	169.155	174.896		167.414	143.535	148.079	153.571	155.969		175.313	173.994	176.157	177.245	170.85		166.883	170.993	174.887	167.48	170.678
	43.536	45.705	52.4	39.16	49.398		42.726	46.84	44.797	55.111	54.931		52.892	44.831	48.057	48.534	52.393		49.726	57.371	58.521	52.279	55.401
	41.47	48.149	56.847	45.046	48.449		44.401	49.049	49.689	58.855	49.535		49.641	54.819	60.988	57.983	56.057		57.452	59.15	54.814	48.973	47.258
	44.815	55.385	55.311	50.875	47.764		50.06	44.038	49.7	61.622	53.139		48.163	47.707	53.826	66.118	52.88		56.023	58.357	57.55	52.349	49.763
	43.383	49.627	48.591	49.097	44.753		51.527	46.37	46.652	54.213	54.854		56.783	60.181	61.438	57.037	61.961		46.559	60.244	51.821	48.035	55.172
	41.56	48.739	48.966	50.701	46.958		51.407	44.809	46.794	52.544	48.328			60.456	51.754	45.855	47.787		48.557	55.846	48.326	49.704	51.825
Subic	52.5384	55.9156	51.6066	56.1328	56.654	Subic	57.6794	61.389	59.4542	62.5978	62.7144	Subic	63.597	68.418	67.0112	67.2818	63.2542	Subic	65.7378	61.7058	66.1206	65.4108	68.7306
OML/subic	1.0575	1.03664	1.06248	1.07082	1.04046	OML/subic	1.01955	1.02404	1.07193	1.05074	1.00882	OML/subic	2.1883	2.12647	2.09686	2.00423	2.106	OML/subic	2.28483	2.521	2.33812	2.47635	2.30361
IML/subic	1.08074	1.0322	1.1174	1.09973	1.05494	IML/subic	0.991422	0.985975	1.00126	1.00924	0.990085	IML/subic	1.73871	1.45058	1.53522	1.54128	1.61819	IML/subic	1.66386	1.84354	1.66733	1.81443	1.55397
GCL/subic	1.45782	1.40977	1.4397	1.48111	1.41278	GCL/subic	1.5977	1.73222	1.6867	1.59838	1.51431	GCL/subic	1.24056	1.17256	1.15457	1.13515	1.2669	GCL/subic	1.29664	1.3366	1.20544	1.29271	1.20849
HLS/subic	4.05508	3.69269	3.94479	3.72374	3.68086	HLS/subic	3.60572	3.41721	3.50646	3.18751	3.25033	HLS/subic	3.20975	2.9583	2.99633	2.98587	3.19006	HLS/subic	3.10836	3.20564	3.0519	3.14523	2.9698
	cont	cont+V	cKO	cKO+V			OML/subic	IML/subic	GCL/subic	HLS/subic
OML	1.05358	1.03502	2.10437	2.38478		5wWT	1.05358	1.077	1.44023	3.81943
IML	1.077	0.995597	1.5768	1.70863		5wWTC	1.03502	0.995597	1.62586	3.39344
GCL	1.44023	1.62586	1.19395	1.26798		5wKO	2.10437	1.5768	1.19395	3.06806
HLS	3.81943	3.39344	3.06806	3.09619		5eKOC	2.38478	1.70863	1.26798	3.09619
	0.014587	0.029032	0.0466516	0.106883
	0.0341174	0.0077497	0.148097	0.119398
	0.0302576	0.0684191	0.0453516	0.058294
	0.170046	0.0943021	0.135535	0.0900933
