# Supplementary material for: KIF2A regulates the development of dentate granule cells and postnatal hippocampal wiring
Source: eLife. 2018 Jan 9;7:e30935. doi: 10.7554/eLife.30935 (PMC5811213; doi:10.7554/eLife.30935)
Supplement: Figure 4—figure supplement 2—source data 1. [file elife-30935-fig4-figsupp2-data1.xlsx]

## Sheet: NFM01
	WT01	WT02	WT03	WT04	KO01	KO02	KO03	KO04
SBI	58.508	87.992	43.742	72.982	40.7	38.542	37.442	48.758
SBI	71.958	82.941	49.585	77.048	42.005	33.83	32.83	39.32
SBI	67.748	76.668	45.175	67.082	44.805	40.72	41.77	47.008
SBI	74.815	69.302	49.505	72.15	46.648	37.95	38.98	42.538
SBI	82.45	74.855	44.075	74.402	48.078	40.588	41.548	41.905
OML	67.1	67.632	50.372	53.88	75.462	53.088	52.083	63.272
OML	70.835	65.728	41.075	56.715	66.312	58.798	58.611	63.56
OML	64.155	77.885	44.695	69.298	66.24	47.998	47.749	63.855
OML	71.15	72.26	48.818	60.752	64.74	55.22	55.825	57.542
OML	77.285	80.435	49.888	64.02	67.332	55.172	55.959	68.745
IML	71.752	64.372	42.035	72.988	50.812	38.448	38.639	52.608
IML	62.535	64.105	36.75	56.345	48.215	39.38	39.849	55.055
IML	64.61	69.058	44.768	65.19	45.218	34.335	34.115	48.382
IML	64.91	69.282	44.402	63.982	46.66	41.178	41.693	43.425
IML	59.662	69.675	46.088	69.85	44.828	39.075	38.989	51.038
GCL	59.19	49.578	44.215	53.25	31.595	24.418	24.382	26.375
GCL	57.155	50.285	44.88	59.532	35.24	23.542	23.782	31.7
GCL	60.28	53.028	45.238	54.375	37.09	25.92	26.012	30.365
GCL	55.212	56.715	44.168	60.935	36.482	30.048	29.958	38.465
GCL	59.428	55.32	45.002	60.39	32.288	27.51	27.943	33.25
Hilus	101.44	93.805	73.475	102.358	76.84	64.135	63.198	89.168
Hilus	98.648	97.692	76.348	93.692	81.595	77.148	78.065	89.63
Hilus	105.845	83.032	76.668	88.502	70.41	65.85	66.112	79.425
Hilus	98.125	95.605	79.76	94.842	85.45	74.558	73.987	76.152
Hilus	99.948	87.225	78.342	89.802	77.305	71.278	70.497	75.838

## Sheet: NFM02
	WTR01	WTR02	WTR03	WTR04	KOR01	KOR02	KOR03	KOR04
SBI	37.902	32.82	30.875	47.758	27.362	39.6	33.87	36.918
SBI	41.53	35.538	27.685	54.7	28.482	37.295	38.268	40.518
SBI	40.825	35.95	25.51	56.218	25.828	36.718	36.64	37.208
SBI	44.125	34.722	30.918	47.568	24.93	40.402	42.422	40.345
SBI	45.298	36.385	32.208	50.188	26	43.525	41.282	40.482
OML	60.638	27.15	30.185	53.208	30.25	41.098	46.052	54.568
OML	68.775	31.928	36.77	57.21	28.322	40.23	40.158	52.66
OML	66.022	36.312	30.492	52.892	28.912	49.745	39.412	51.948
OML	58.858	30.395	30.98	52.09	29.072	43.782	37.678	48.598
OML	62.125	35.362	28.87	60.74	31.85	47.875	40.575	48.53
IML	43.675	31.688	30.1	50.542	30.07	39.208	36.505	43.208
IML	45.052	38.988	31.98	56.628	28.625	37.795	40.21	46.225
IML	53.965	35.488	37.095	54.952	29.928	39.912	39.392	38.095
IML	44.428	34.468	37.38	55.41	29.378	36.368	38.262	43.108
IML	51.145	38.292	39.552	53.598	30.992	36.515	37.552	43.315
GCL	53.518	40.558	36.288	42.45	21.658	35.93	31.902	38.9
GCL	40.075	38.2	34.498	45.748	30.858	33.388	34.565	47.828
GCL	46.102	36.968	33.465	45.26	30.628	34.21	37.475	42
GCL	52.445	41.548	30.625	36.795	30.64	34.745	34.01	40.355
GCL	41.488	39.222	32.56	42.62	32.655	40.615	33.528	43.752
Hilus	81.745	71.428	56.38	88.918	58.175	77.328	59.1	87.388
Hilus	79.745	64.19	68.855	88.645	57.31	73.41	56.355	83.48
Hilus	77.235	70.918	58.685	89.318	53.54	80.23	61.262	70.5
Hilus	79.638	65.865	58.01	86.862	54.21	84.261	63.318	74.265
Hilus	78.852	69.243	61.9	81.375	59.132	81.268	62.59	80.518

## Sheet: NFM03
	WTR01	WTR02	WTR03	WTR04	KOR01	KOR02	KOR03	KOR04
SBI	58.508	32.82	43.742	47.758	40.7	39.6	37.442	36.918
SBI	71.958	35.538	49.585	54.7	42.005	37.295	32.83	40.518
SBI	67.748	35.95	45.175	56.218	44.805	36.718	41.77	37.208
SBI	74.815	34.722	49.505	47.568	46.648	40.402	38.98	40.345
SBI	82.45	36.385	44.075	50.188	48.078	43.525	41.548	40.482
OML	67.1	27.15	50.372	53.208	75.462	41.098	52.083	54.568
OML	70.835	31.928	41.075	57.21	66.312	40.23	58.611	52.66
OML	64.155	36.312	44.695	52.892	66.24	49.745	47.749	51.948
OML	71.15	30.395	48.818	52.09	64.74	43.782	55.825	48.598
OML	77.285	35.362	49.888	60.74	67.332	47.875	55.959	48.53
IML	71.752	31.688	42.035	50.542	50.812	39.208	38.639	43.208
IML	62.535	38.988	36.75	56.628	48.215	37.795	39.849	46.225
IML	64.61	35.488	44.768	54.952	45.218	39.912	34.115	38.095
IML	64.91	34.468	44.402	55.41	46.66	36.368	41.693	43.108
IML	59.662	38.292	46.088	53.598	44.828	36.515	38.989	43.315
GCL	59.19	40.558	44.215	42.45	31.595	35.93	24.382	38.9
GCL	57.155	38.2	44.88	45.748	35.24	33.388	23.782	47.828
GCL	60.28	36.968	45.238	45.26	37.09	34.21	26.012	42
GCL	55.212	41.548	44.168	36.795	36.482	34.745	29.958	40.355
GCL	59.428	39.222	45.002	42.62	32.288	40.615	27.943	43.752
Hilus	101.44	71.428	73.475	88.918	76.84	77.328	63.198	87.388
Hilus	98.648	64.19	76.348	88.645	81.595	73.41	78.065	83.48
Hilus	105.845	70.918	76.668	89.318	70.41	80.23	66.112	70.5
Hilus	98.125	65.865	79.76	86.862	85.45	84.261	73.987	74.265
Hilus	99.948	69.243	78.342	81.375	77.305	81.268	70.497	80.518
