# Supplementary material for: KIF2A regulates the development of dentate granule cells and postnatal hippocampal wiring
Source: eLife. 2018 Jan 9;7:e30935. doi: 10.7554/eLife.30935 (PMC5811213; doi:10.7554/eLife.30935)
Supplement: Figure 4—source data 1. [file elife-30935-fig4-data1.xlsx]

## Sheet: 5w_1
	WT01	WT02	WT03	WT04	KO01	KO02	KO03	KO04
SBI	34.395	76.445	65.862	40.29	41.362	46.015	39.862	47.802
SBI	39.808	74.17	69.595	44.032	34.435	39.305	38.112	46.682
SBI	42.042	77.78	71.612	42.382	39.105	44.195	33.995	53.758
SBI	38.89	76.488	68.078	45.9	39.05	42.832	35.182	52.83
SBI	41.915	77.878	71.895	47.115	42.002	42.635	37.285	50.362			WTR01	WTR02	WTR03	WTR04	KOR01	KOR02	KOR03	KOR04
OML	26.625	52.908	46.382	31.83	48.268	53.065	53.132	55.562		OML/SBI	0.67559	0.691136	0.668248	0.724334	1.23162	1.23417	1.44039	1.1049
OML	28.495	41.798	47.922	28.328	48.07	53.43	46.038	62.08		OML/SBI	0.72304	0.546007	0.690435	0.644642	1.22656	1.24266	1.24808	1.23452
OML	21.582	45.835	48.735	28.915	49.6	60.592	43.715	56.998		OML/SBI	0.547628	0.598742	0.702148	0.658	1.2656	1.40923	1.1851	1.13346
OML	26.34	48.148	54.195	30.272	56.498	57.225	45.222	55.555		OML/SBI	0.668358	0.628956	0.780813	0.68888	1.44161	1.33093	1.22595	1.10476
OML	25.188	44.142	42.655	28.022	53.888	60.81	45.962	57.292		OML/SBI	0.639127	0.576626	0.614551	0.637678	1.37502	1.4143	1.24601	1.1393
IML	56.278	112.338	93.715	53.27	74.492	81.585	64.878	75.115		IML/SBI	1.42801	1.46747	1.3502	1.21223	1.90075	1.89748	1.75882	1.49373
IML	55.932	107.49	95.748	55.53	77.422	74.84	66.715	74.838		IML/SBI	1.41923	1.40414	1.37949	1.26366	1.97551	1.74061	1.80862	1.48822
IML	57.822	109.202	100.182	55.53	82.598	78.808	67.882	79.802		IML/SBI	1.46719	1.4265	1.44337	1.26366	2.10759	1.8329	1.84026	1.58694
IML	58.995	112.305	102.44	58.785	71.555	79.335	64.325	75.928		IML/SBI	1.49696	1.46704	1.4759	1.33773	1.82581	1.84515	1.74383	1.5099
IML	50.382	99.615	110.165	59.902	69.888	75.395	65.065	74.4		IML/SBI	1.27841	1.30127	1.5872	1.36315	1.78328	1.75352	1.76389	1.47951
GCL	37.41	59.545	63.285	38.915	33.848	44.322	35.815	39.412		GCL/SBI	0.949251	0.777835	0.911777	0.885563	0.863672	1.03083	0.970933	0.783744
GCL	36.175	58.038	60.732	40.135	39.682	48.96	38.238	40.835		GCL/SBI	0.917914	0.758149	0.874995	0.913326	1.01253	1.1387	1.03662	0.812042
GCL	36.792	52.395	64.118	48.71	36.372	47.972	35.188	41.44		GCL/SBI	0.93357	0.684435	0.923779	1.10846	0.928075	1.11572	0.953935	0.824073
GCL	33.19	63.288	63.85	38.475	40.53	46.31	34.768	39.508		GCL/SBI	0.842172	0.82673	0.919917	0.87555	1.03417	1.07707	0.942549	0.785653
GCL	33.67	55.768	67.718	40.542	34.072	49.915	35.822	38.48		GCL/SBI	0.854352	0.728496	0.975646	0.922587	0.869388	1.16091	0.971123	0.765211
Hilus	109.44	164.062	165.372	121.525	104.895	120.685	102.385	131.24		Hilus/SBI	2.77696	2.14314	2.38259	2.76546	2.67652	2.80686	2.77562	2.60983
Hilus	111.902	166.648	175.028	120.785	118.428	124.028	96.198	118.362		Hilus/SBI	2.83943	2.17692	2.52171	2.74862	3.02183	2.88461	2.6079	2.35374
Hilus	97.082	167.092	181.152	113.732	105.578	112.255	98.468	105.425		Hilus/SBI	2.46338	2.18272	2.60994	2.58812	2.69395	2.6108	2.66944	2.09647
Hilus	104.77	182.212	183.938	101.945	115.268	116.022	108.788	115.585		Hilus/SBI	2.65846	2.38023	2.65008	2.31989	2.9412	2.69841	2.94921	2.29852
Hilus	98.808	157.188	185.59	114.882	124.945	123.485	99.168	108.72		Hilus/SBI	2.50718	2.05334	2.67388	2.61429	3.18812	2.87198	2.68841	2.162
SBIm	39.41	76.5522	69.4084	43.9438	39.1908	42.9964	36.8872	50.2868			WT	KO			WT SD	KO SD
OMLm	25.646	46.5662	47.9778	29.4734	51.2648	57.0244	46.8138	57.4974		OML/HiL	0.260745	0.47074		OML/SBIm	0.0237488	0.0400759
IMLm	55.8818	108.19	100.45	56.6034	75.191	77.9926	65.773	76.0166		IML/HiL	0.553781	0.655462		IML/SBIm	0.0377765	0.0634003
GCLm	35.4474	57.8068	63.9406	41.3554	36.9008	47.4958	35.9662	39.935		GCL/HiL	0.349874	0.355877		GCL/SBIm	0.0375703	0.0458957
HiLm	104.4	167.44	178.216	114.574	113.823	119.295	101.001	115.866		HiL/SBI	2.51298	2.68027		HiL/SBIm	0.232737	0.280614

## Sheet: 5w_2
	WTR01	WTR02	WTR03	WTR04	KOR01	KOR02	KOR03	KOR04
SBI	63.388	36.66	59.429	53.072	57.242	58.098	62.695	60.548
SBI	54.03	39.332	64.515	52.935	53.455	55.612	55.802	61.035
SBI	62.248	38.742	62.475	49.205	56.43	56.782	58.055	63.948
SBI	56.682	37.688	63.626	51.742	59.182	52.768	63.122	64.44
SBI	54.368	41.84	63.876	53.84	57.74	55.152	57.645	62.782			WTR01	WTR02	WTR03	WTR04	KOR01	KOR02	KOR03	KOR04
OML	45.44	34.548	30.008	39.432	60.46	54.112	63.938	61.78		OML/SBI	0.781519	0.889211	0.477955	0.755999	1.06425	0.971797	1.07524	0.98768
OML	39.865	36.125	29.552	39.788	58.852	55.362	61.438	61.63		OML/SBI	0.685635	0.929801	0.470692	0.762824	1.03595	0.994246	1.0332	0.985282
OML	40.132	30.545	35.582	40.888	57.148	57.898	62.34	63.348		OML/SBI	0.690227	0.786181	0.566735	0.783914	1.00595	1.03979	1.04837	1.01275
OML	40.51	33.135	34.2	39.17	58.43	58.948	61.298	61.892		OML/SBI	0.696728	0.852843	0.544723	0.750976	1.02852	1.05865	1.03085	0.989471
OML	41.775	35.035	30.125	40.442	58.052	60.95	63.375	63.332		OML/SBI	0.718485	0.901746	0.479818	0.775363	1.02187	1.0946	1.06577	1.01249
IML	86.108	75.16	53.132	72.7	75.615	82.6	90.998	92.28		IML/SBI	1.48096	1.9345	0.846264	1.39382	1.33102	1.48341	1.53031	1.47529
IML	92.672	69.435	56.245	70.99	74.435	78.322	88.318	96.905		IML/SBI	1.59386	1.78715	0.895846	1.36104	1.31025	1.40658	1.48524	1.54923
IML	95.912	68.18	61.395	82.975	74.66	79.302	85.205	91.138		IML/SBI	1.64958	1.75485	0.977873	1.59081	1.31421	1.42418	1.43289	1.45703
IML	87.205	77.702	56.032	75.685	82.295	83.082	87.068	88.542		IML/SBI	1.49983	1.99993	0.892454	1.45105	1.44861	1.49207	1.46422	1.41553
IML	88.748	77.84	63.842	75.85	38.16	79.415	88.7	89.03		IML/SBI	1.52637	2.00348	1.01685	1.45421	0.671715	1.42621	1.49166	1.42333
GCL	59.68	43.37	47.782	53.655	36.225	46.138	47.13	48.472		GCL/SBI	1.02643	1.11628	0.761051	1.02869	0.637654	0.828592	0.792583	0.774925
GCL	54.308	46.912	52.932	54.612	34.668	37.902	50.215	45.385		GCL/SBI	0.934039	1.20744	0.843078	1.04703	0.610247	0.680682	0.844463	0.725573
GCL	53.482	44.805	47.4	56.852	30.71	45.002	45.538	49.478		GCL/SBI	0.919832	1.15321	0.754967	1.08998	0.540576	0.808191	0.76581	0.791008
GCL	57.908	43.952	50.5	59.535	31.208	39.862	48.79	48.405		GCL/SBI	0.995955	1.13126	0.804342	1.14142	0.549342	0.715881	0.820499	0.773853
GCL	63.942	45.645	53.68	53.495	32.152	42.105	49.5	44.182		GCL/SBI	1.09973	1.17483	0.854992	1.02562	0.565959	0.756164	0.832439	0.70634
Hilus	158.7	105.525	94.892	119.118	121.16	137.422	152.75	164.568		Hilus/SBI	2.72947	2.71605	1.5114	2.28376	2.13273	2.46796	2.56879	2.63096
Hilus	139.09	106.325	88.58	125.695	127.79	145.242	163.055	156.362		Hilus/SBI	2.3922	2.73664	1.41086	2.40985	2.24944	2.6084	2.74209	2.49977
Hilus	148.45	103.64	91.33	118.648	122.155	141.888	154.995	155.02		Hilus/SBI	2.55318	2.66753	1.45467	2.27475	2.15025	2.54817	2.60654	2.47831
Hilus	153.018	117.16	90.555	123.895	132.44	141.868	166.505	155.095		Hilus/SBI	2.63174	3.01552	1.44232	2.37534	2.33129	2.54781	2.80011	2.47951
Hilus	146.55	112.358	91.1	125.658	132.788	137.845	166.378	155.525		Hilus/SBI	2.5205	2.89192	1.451	2.40914	2.33741	2.47556	2.79797	2.48639
SBIm	58.1432	38.8524	62.7842	52.1588	56.8098	55.6824	59.4638	62.5506			WT ave	KO ave			WT SD	KO SD
OMLm	41.5444	33.8776	31.8934	39.944	58.5884	57.454	62.4778	62.3964		OML/SBIm	0.715069	1.02784		OML/SBIm	0.140955	0.0334268
IMLm	90.129	73.6634	58.1292	75.64	69.033	80.5442	88.0578	91.579		IML/SBIm	1.45554	1.40165		IML/SBIm	0.365857	0.183455
GCLm	57.864	44.9368	50.4588	55.6298	32.9926	42.2018	48.2346	47.1844		GCL/SBIm	1.00551	0.726039		GCL/SBIm	0.141702	0.0979691
HiLm	149.162	109.002	91.2914	122.603	127.267	140.853	160.737	157.314		HiL/SBIm	2.28783	2.49697		HiL/SBIm	0.532627	0.187007

## Sheet: 5w_3
	WTR01	WTR02	WTR03	WTR04	KOR01	KOR02	KOR03	KOR04
SBI	63.388	76.445	59.429	40.29	57.242	46.015	62.695	47.802
SBI	54.03	74.17	64.515	44.032	53.455	39.305	55.802	46.682
SBI	62.248	77.78	62.475	42.382	56.43	44.195	58.055	53.758
SBI	56.682	76.488	63.626	45.9	59.182	42.832	63.122	52.83
SBI	54.368	77.878	63.876	47.115	57.74	42.635	57.645	50.362			WTR01	WTR02	WTR03	WTR04	KOR01	KOR02	KOR03	KOR04
OML	45.44	52.908	30.008	31.83	60.46	53.065	63.938	55.562		OML/SBI	0.781519	0.691136	0.477955	0.724334	1.06425	1.23417	1.07524	1.1049
OML	39.865	41.798	29.552	28.328	58.852	53.43	61.438	62.08		OML/SBI	0.685635	0.546007	0.470692	0.644642	1.03595	1.24266	1.0332	1.23452
OML	40.132	45.835	35.582	28.915	57.148	60.592	62.34	56.998		OML/SBI	0.690227	0.598742	0.566735	0.658	1.00595	1.40923	1.04837	1.13346
OML	40.51	48.148	34.2	30.272	58.43	57.225	61.298	55.555		OML/SBI	0.696728	0.628956	0.544723	0.68888	1.02852	1.33093	1.03085	1.10476
OML	41.775	44.142	30.125	28.022	58.052	60.81	63.375	57.292		OML/SBI	0.718485	0.576626	0.479818	0.637678	1.02187	1.4143	1.06577	1.1393
IML	86.108	112.338	53.132	53.27	75.615	81.585	90.998	75.115		IML/SBI	1.48096	1.46747	0.846264	1.21223	1.33102	1.89748	1.53031	1.49373
IML	92.672	107.49	56.245	55.53	74.435	74.84	88.318	74.838		IML/SBI	1.59386	1.40414	0.895846	1.26366	1.31025	1.74061	1.48524	1.48822
IML	95.912	109.202	61.395	55.53	74.66	78.808	85.205	79.802		IML/SBI	1.64958	1.4265	0.977873	1.26366	1.31421	1.8329	1.43289	1.58694
IML	87.205	112.305	56.032	58.785	82.295	79.335	87.068	75.928		IML/SBI	1.49983	1.46704	0.892454	1.33773	1.44861	1.84515	1.46422	1.5099
IML	88.748	99.615	63.842	59.902	38.16	75.395	88.7	74.4		IML/SBI	1.52637	1.30127	1.01685	1.36315	0.671715	1.75352	1.49166	1.47951
GCL	59.68	59.545	47.782	38.915	36.225	44.322	47.13	39.412		GCL/SBI	1.02643	0.777835	0.761051	0.885563	0.637654	1.03083	0.792583	0.783744
GCL	54.308	58.038	52.932	40.135	34.668	48.96	50.215	40.835		GCL/SBI	0.934039	0.758149	0.843078	0.913326	0.610247	1.1387	0.844463	0.812042
GCL	53.482	52.395	47.4	48.71	30.71	47.972	45.538	41.44		GCL/SBI	0.919832	0.684435	0.754967	1.10846	0.540576	1.11572	0.76581	0.824073
GCL	57.908	63.288	50.5	38.475	31.208	46.31	48.79	39.508		GCL/SBI	0.995955	0.82673	0.804342	0.87555	0.549342	1.07707	0.820499	0.785653
GCL	63.942	55.768	53.68	40.542	32.152	49.915	49.5	38.48		GCL/SBI	1.09973	0.728496	0.854992	0.922587	0.565959	1.16091	0.832439	0.765211
Hilus	158.7	164.062	94.892	121.525	121.16	120.685	152.75	131.24		Hilus/SBI	2.72947	2.14314	1.5114	2.76546	2.13273	2.80686	2.56879	2.60983
Hilus	139.09	166.648	88.58	120.785	127.79	124.028	163.055	118.362		Hilus/SBI	2.3922	2.17692	1.41086	2.74862	2.24944	2.88461	2.74209	2.35374
Hilus	148.45	167.092	91.33	113.732	122.155	112.255	154.995	105.425		Hilus/SBI	2.55318	2.18272	1.45467	2.58812	2.15025	2.6108	2.60654	2.09647
Hilus	153.018	182.212	90.555	101.945	132.44	116.022	166.505	115.585		Hilus/SBI	2.63174	2.38023	1.44232	2.31989	2.33129	2.69841	2.80011	2.29852
Hilus	146.55	157.188	91.1	114.882	132.788	123.485	166.378	108.72		Hilus/SBI	2.5205	2.05334	1.451	2.61429	2.33741	2.87198	2.79797	2.162
SBIm	58.1432	76.5522	62.7842	43.9438	56.8098	42.9964	59.4638	50.2868			WT ave	KO ave			WT SD	KO SD
OMLm	41.5444	46.5662	31.8934	29.4734	58.5884	57.0244	62.4778	57.4974		OML/SBIm	0.625376	1.13791		OML/SBIm	0.0894144	0.129227
IMLm	90.129	108.19	58.1292	56.6034	69.033	77.9926	88.0578	76.0166		IML/SBIm	1.29434	1.5054		IML/SBIm	0.245983	0.262833
GCLm	57.864	57.8068	50.4588	41.3554	32.9926	47.4958	48.2346	39.935		GCL/SBIm	0.873778	0.822676		GCL/SBIm	0.118962	0.194499
HiLm	149.162	167.44	91.2914	114.574	127.267	119.295	160.737	115.866		HiL/SBIm	2.21443	2.50549		HiL/SBIm	0.488491	0.27252
