# Supplementary material for: KIF2A regulates the development of dentate granule cells and postnatal hippocampal wiring
Source: eLife. 2018 Jan 9;7:e30935. doi: 10.7554/eLife.30935 (PMC5811213; doi:10.7554/eLife.30935)
Supplement: Figure 5—source data 1. [file elife-30935-fig5-data1.xlsx]

## Sheet: 5F,G
No. of OGL		MF		CB		No.of IGL		NF			MF		CB		NF
WT	cKO	WT	cKO	WT	cKO	WT	cKO	WT	cKO		WT	cKO	WT	cKO	WT	cKO
54	75	0	8	0	6	22	30	2	13		0	14.8148	0	8	9.09091	43.3333
49	91	0	7	0	5	20	28	1	9		0	14.2857	0	5.49451	5	32.1429
82	98	0	10	0	6	13	29	0	9		0	12.1951	0	6.12245	0	31.0345
53	105	0	8	0	6	24	31	1	12		0	15.0943	0	5.71429	4.16667	38.7097
76	90	0	9	0	8	19	31	0	10		0	11.8421	0	8.88889	0	32.2581
124	118	0	16	0	7	21	27	1	8		0	12.9032	0	5.9322	4.7619	29.6296
75	105	0	10	0	9	18	29	0	10		0	13.3333	0	8.57143	0	34.4828
78	108	0	10	0	8	22	33	0	12		0	12.8205	0	7.40741	0	36.3636
75	122	0	8	0	7	20	31	0	10		0	10.6667	0	5.7377	0	32.2581
58	98	0	9	0	6	19	24	0	8		0	15.5172	0	6.12245	0	33.3333
66	89	0	8	0	7	17	21	1	8		0	12.1212	0	7.86517	5.88235	38.0952
83	98	0	10	0	8	18	24	0	7		0	12.0482	0	8.16327	0	29.1667
49	110	0	7	0	8	24	26	0	9		0	14.2857	0	7.27273	0	34.6154
76	88	0	8	0	7	21	25	1	9		0	10.5263	0	7.95455	4.7619	36
95	96	0	12	0	8	20	26	0	10		0	12.6316	0	8.33333	0	38.4615
											0	13.0057	0	7.17202	2.24425	34.659
											0	1.53159	0	1.18977	3.04032	3.88101

## Sheet: 5H
ectopic cells		cont	cKO	50μmOS
101014_1	1	5	28	M line
	2	7	23
	3	4	33
	4	3	29
	5	6	29
101014_2	1	4	30
	2	6	38
	3	5	34
	4	5	28
	5	6	35
101017_1	1	4	38
	2	4	39
	3	5	37
	4	6	34
	5	5	36
101021_1	1	4	27
	2	5	26
	3	6	27
	4	4	29
	5	6	28
101021_2	1	6	31
	2	5	30
	3	5	32
	4	4	30
	5	4	31
		4.96	31.28
		0.978093	4.19841
		4.9+0.9	31+4.2
