# Supplementary material for: KIF2A regulates the development of dentate granule cells and postnatal hippocampal wiring
Source: eLife. 2018 Jan 9;7:e30935. doi: 10.7554/eLife.30935 (PMC5811213; doi:10.7554/eLife.30935)
Supplement: Figure 5—source data 2. [file elife-30935-fig5-data2.xlsx]

## Sheet: density
	WT DOML'	'HT DOML'	'WT DIML'	'HT DIML'
mean	0.510748	0.724132	0.479805	0.714378
sd	0.117378	0.0881664	0.0507159	0.139861
	WT DOML \n (n=5)'	'HT DOML \n (n=5)'	'WT DIML \n (n=5)'	'HT DIML \n (n=5)'
stubby ratio	0	0.0028169	0	0
mushroom ratio	0.452482	0.353952	0.437778	0.199711
thin ratio	0.547518	0.643231	0.562222	0.800289
stubby sd	0	0.0056338	0	0
mushroom sd	0.124075	0.119525	0.0793803	0.18922
thin sd	0.124075	0.121588	0.0793803	0.18922

## Sheet: source
density
Wto	0.529983	0.582326	0.289033	0.522954	0.629442	Ftest	0.592899	even
Hto	0.699884	0.713862	0.881544	0.608634	0.716734		0.0196766	significant
Wti	0.557627	0.496975	0.424534	0.423436	0.496451	Ftest	0.0747514	even
Hti	0.850081	0.81819	0.774548	0.464318	0.664755		0.0135277	significant
morphology	n=5
	Wto					Hto
thin	0.538462	0.73913	0.5	0.6	0.36	0.813559	0.710526	0.468354	0.674419	0.549296	Ftest	0.969645	Ttest	0.302539
mushroom	0.461538	0.26087	0.5	0.4	0.64	0.186441	0.289474	0.531646	0.325581	0.43662	Ftest	0.944017	Ttest	0.285767
stubby	0	0	0	0	0	0	0	0	0	0.0140845
sum	1	1	1	1	1	1	1	1	1	1
	Wti					Hti
thin	0.6	0.666667	0.444444	0.6	0.5	0.8	0.465753	0.962963	1	0.772727	Ftest	0.120971	Ttest	0.0488904
mushroom	0.4	0.333333	0.555556	0.4	0.5	0.2	0.534247	0.037037	0	0.227273	Ftest	0.120971	Ttest	0.0488904
stubby	0	0	0	0	0	0	0	0	0	0
sum	1	1	1	1	1	1	1	1	1	1

## Sheet: diameter
	dendrite diameter	(um)	spine density	(1/10um)
	mean	sd	mean	sd
KO01_2048_40	1.15	0.0973	22.3	7.18
KO01_2048_20	1.09	0.112	15.3	11.7
KO01_2048_70	1.04	0.108	18.8	16.7
WT1DOML01	0.957	0.0962	8.61	5.36
WT1DOML02	1.05	0	24.5	0
WT1DIML01	1.13	0.211	9.28	12.9
KO1DOML01	1.09	0.0826	17.3	7.3
KO1DIML01	1.19	0.231	15.4	10
