# Supplementary material for: KIF2A regulates the development of dentate granule cells and postnatal hippocampal wiring
Source: eLife. 2018 Jan 9;7:e30935. doi: 10.7554/eLife.30935 (PMC5811213; doi:10.7554/eLife.30935)
Supplement: Figure 6—figure supplement 1—source data 1. [file elife-30935-fig6-figsupp1-data1.xlsx]

## Sheet: culture
P1	1	2		1	2	3	4			1	2	3	4	1	2	3	4	f-test(2.2)		t-test(2.2)
WT1	2	1	KO01	1			1		WT	0.821249	0.178751	0	0	0.0269891	0.0236703	0	0	0.919394	0.755037	#DIV/0!	#DIV/0!
WT2	1		KO02	2	2				cKO	0.28596	0.344417	0.278512	0.0911112	0.0434407	0.0563125	0.0288472	0.0340348	2.7767e-06	0.00391074	1.24878e-06	0.00173797
WT3	1		KO03	2	1	2
WT4	1		KO04			1				0.875	0.125	0	0	0.328125	0.34375	0.25	0.078125
WT5	1		KO05	3			1			0.824561	0.175439	0	0	0.275862	0.413793	0.258621	0.0517241
WT6	2		KO06	2	1					0.823529	0.176471	0	0	0.310345	0.275862	0.310345	0.103448
WT7	2		KO07	1	3	1				0.761905	0.238095	0	0	0.229508	0.344262	0.295082	0.131148
WT8		3	KO08			1
WT9	5		KO09	2	2	1	1
WT10	6		KO10	2
WT11	3		KO11		2
WT12	3	1	KO12	1	3	2
WT13	5	1	KO13	3	2	1	1
WT14	3		KO14		1	1
WT15	1		KO15			1
WT16	3	1	KO16	2	1	1	1
WT17	2		KO17		2	2
WT18	2		KO18		1
WT19	3		KO19		1	1
WT20	3		KO20			1
sum	49	7	56	21	22	16	5	64
	0.875	0.125		0.328125	0.34375	0.25	0.078125
P2	1	2		1	2	3	4
WT1	2	0	KO01	1		1
WT2	1	0	KO02	1	1
WT3	3	1	KO03	1	3	1
WT4	3	1	KO04	1			1
WT5	2	0	KO05		2	1
WT6	1	0	KO06	1		1
WT7	1	0	KO07	1	1	1
WT8	3	1	KO08	2	1	1
WT9	3	1	KO09	1	2		1
WT10	2	1	KO10	1	1	2
WT11	2		KO11		1	2
WT12	3		KO12		1	1
WT13	4	1	KO13	1	2
WT14	5		KO14	1	1
WT15	3	1	KO15	1	1	1
WT16	3	1	KO16		2	1
WT17	0	1	KO17		1
WT18	1		KO18	2	1	1
WT19	2		KO19	1	2		1
WT20	3	1	KO20		1	1
sum	47	10	57	16	24	15	3	58
	0.824561	0.175439		0.275862	0.413793	0.258621	0.0517241
P3	1	2		1	2	3	4
WT1	2	2	KO01	1
WT2	3		KO02		3
WT3	3		KO03	1	1	1
WT4	3		KO04	2		1
WT5	1	1	KO05		1	1	1
WT6	2		KO06	2		1	1
WT7	2		KO07	2		1
WT8	2		KO08	1		1
WT9	3		KO09			1
WT10	2	1	KO10		1		1
WT11	3		KO11		1	1
WT12	2		KO12		2	2			M
WT13	3		KO13	1	2	1	1
WT14	1		KO14	1			1
WT15	3	1	KO15		3	1
WT16	2		KO16	2		1
WT17	3	1	KO17	1	1	1	1
WT18	1	1	KO18	1		2
WT19		1	KO19	1		1
WT20	1	1	KO20	2	1	1
sum	42	9	51	18	16	18	6	58
	0.823529	0.176471		0.310345	0.275862	0.310345	0.103448
P4	1	2		1	2	3	4
WT1	2	1	KO01	1	2		1
WT2	1		KO02	1		2
WT3	2	2	KO03	1		1	1
WT4	1	1	KO04	2		2
WT5	2	1	KO05	1	2		1
WT6	2		KO06			1	1
WT7	3	1	KO07		2	1
WT8	3	1	KO08		1
WT9	2	1	KO09		2	1
WT10	4		KO10	2	2
WT11	2		KO11		1		1
WT12	2	1	KO12	1		1
WT13	2		KO13	1	1
WT14	3	1	KO14	1	1		1
WT15	2		KO15		2	1
WT16	3	1	KO16			1
WT17	1	2	KO17	1	2	2	1
WT18	4	1	KO18	1	1	2
WT19	3		KO19			1	1
WT20	4	1	KO20	1	2	2
sum	48	15	63	14	21	18	8	61
	0.761905	0.238095		0.229508	0.344262	0.295082	0.131148
tot	186	41	227	69	83	67	22	241
