# Supplementary material for: KIF2A regulates the development of dentate granule cells and postnatal hippocampal wiring
Source: eLife. 2018 Jan 9;7:e30935. doi: 10.7554/eLife.30935 (PMC5811213; doi:10.7554/eLife.30935)
Supplement: Figure 6—source data 1. [file elife-30935-fig6-data1.xls]

## Sheet: NM01
DIV5	WTd	KOd	WTda	KOda	WTa	KOa	WTtot	KOtot
	3	1	0	1	0	2	3	4
	2	2	0	0	0	3	2	5
	3	1	0	1	0	6	3	8
	2	1	0	2	1	3	3	6
	3	2	0	0	0	4	3	6
	1	1	0	2	0	3	1	6
	2	2	0	0	1	4	3	6
	3	1	0	1	0	3	3	5
	3	1	0	1	0	4	3	6
	3	1	0	2	0	1	2	4
	2	1	0	2	0	2	2	5
	2	1	0	2	1	2	3	5
	2	1	0	1	0	3	2	5
	3	2	0	1	0	2	3	5
	2	1	0	2	0	3	2	6
	2	2	0	1	0	2	2	5
	3	1	0	1	0	2	3	4
	3	1	0	1	0	3	3	5
	1	1	0	2	0	2	1	5
	2	2	0	2	0	2	2	6
	2.35	1.3	0	1.25	0.15	2.8	2.45	5.35
	0.67082	0.470162	0	0.71635	0.366348	1.10501	0.686333	0.933302
	M	M/N	N
WT	2.35	0	0.15
KO	1.3	1.25	2.8

## Sheet: NM02
DIV13	WTd	KOd	WTda	KOda	WTa	KOa	WTtot	KOtot
	2	2	0	0	0	3	2	5
	3	1	0	0	0	4	3	5
	2	2	0	2	0	3	2	7
	3	1	0	1	0	2	3	4
	2	1	0	0	0	2	2	3
	2	2	0	2	1	3	3	7
	1	1	0	1	0	2	1	4
	2	2	0	2	0	4	2	8
	3	1	0	2	1	2	4	5
	1	1	0	1	0	4	2	6
	2	1	0	1	0	3	2	5
	2	2	0	1	0	3	2	6
	2	1	0	2	0	2	2	5
	3	1	0	1	0	1	3	3
	2	2	0	1	0	2	2	5
	2	1	0	1	0	3	2	5
	2	3	0	1	1	3	3	7
	3	1	0	2	0	2	3	5
	2	1	0	1	0	1	2	3
	3	1	0	2	0	3	3	6
	2.2	1.4	0	1.2	0.15	2.6	2.4	5.2
	0.615587	0.598243	0	0.695852	0.366348	0.88258	0.680557	1.39925
	M	M/N	N
WT	2.2	0	0.15
KO	1.4	1.2	2.6

## Sheet: NM03
DIV13	WTd	KOd	WTda	KOda	WTa	KOa	WTtot	KOtot
	1	3	0	2	0	3	1	8
	2	2	0	2	0	4	2	8
	2	1	0	1	1	3	3	5
	1	1	0	2	0	2	1	5
	2	2	0	1	1	1	3	4
	3	2	0	0	0	2	3	4
	3	1	0	1	0	3	3	5
	2	3	0	0	0	2	2	5
	3	1	0	0	1	2	4	3
	3	1	0	0	0	1	2	2
	2	1	0	2	0	2	2	5
	2	2	0	0	0	3	2	5
	2	1	0	2	0	2	2	5
	2	1	0	1	0	3	2	5
	3	2	0	2	0	1	3	5
	3	1	0	2	0	2	3	5
	1	3	0	2	0	4	1	9
	2	1	0	0	0	4	2	5
	3	2	0	2	1	2	4	6
	3	1	0	2	0	3	3	6
	2.25	1.6	0	1.2	0.2	2.45	2.4	5.25
	0.71635	0.753937	0	0.894427	0.410391	0.944513	0.88258	1.61815
	M	M/N	N
WT	2.25	0	0.2
KO	1.6	1.2	2.45

## Sheet: NM04
DIV13	WTd	KOd	WTda	KOda	WTa	KOa	WTtot	KOtot
	3	1	0	1	0	2	3	4
	2	2	0	2	0	4	2	8
	4	2	0	2	0	4	4	8
	1	2	0	0	0	3	1	5
	3	2	0	0	1	2	4	4
	2	1	0	0	0	1	2	2
	1	1	0	2	0	2	1	5
	1	2	0	1	0	3	1	6
	2	2	0	1	0	1	2	4
	4	3	0	2	0	2	2	7
	2	1	0	0	1	2	3	3
	4	2	0	0	0	1	4	3
	1	2	0	1	1	3	2	6
	2	1	0	2	0	2	2	5
	1	1	0	1	0	3	1	5
	2	1	0	2	0	1	2	4
	1	3	0	1	0	2	1	6
	2	1	0	2	0	2	2	5
	2	1	0	0	0	5	2	6
	3	1	0	2	0	3	3	6
	2.15	1.6	0	1.1	0.15	2.4	2.2	5.1
	1.03999	0.680557	0	0.852242	0.366348	1.09545	1.00525	1.58612
	M	M/N	N
WT	2.15	0	0.15
KO	1.6	1.1	2.4

## Sheet: NM05
DIV13	WTd	KOd	WTda	KOda	WTa	KOa	WTtot	KOtot
	2	2	0	0	0	2	2	4
	2	2	0	1	0	3	2	6
	3	2	0	0	2	2	5	4
	2	2	0	1	0	5	2	8
	3	1	0	0	0	4	3	5
	3	2	0	1	1	1	4	4
	1	1	0	1	0	2	1	4
	3	1	0	0	0	2	3	3
	2	1	0	3	1	3	3	7
	2	1	0	0	0	3	2	4
	3	1	0	1	0	2	3	4
	1	2	0	2	0	3	1	7
	2	2	0	2	0	3	2	7
	3	1	0	2	0	3	3	6
	3	1	0	1	0	4	3	6
	1	1	0	1	0	2	1	4
	2	1	0	2	1	3	3	6
	3	1	0	0	0	3	3	4
	3	1	0	2	0	1	3	4
	3	1	0	2	0	3	3	6
	2.35	1.35	0	1.1	0.25	2.7	2.6	5.15
	0.74516	0.48936	0	0.91191	0.55012	0.978721	0.994723	1.42441
	M	M/N	N
WT	2.35	0	0.25
KO	1.35	1.1	2.7
