# Supplementary figures and images for: KIF2A regulates the development of dentate granule cells and postnatal hippocampal wiring
Source: eLife journal article supplement (doi:10.7554/elife.30935), 2018-01-09

## Figure 4-figure supplement 2

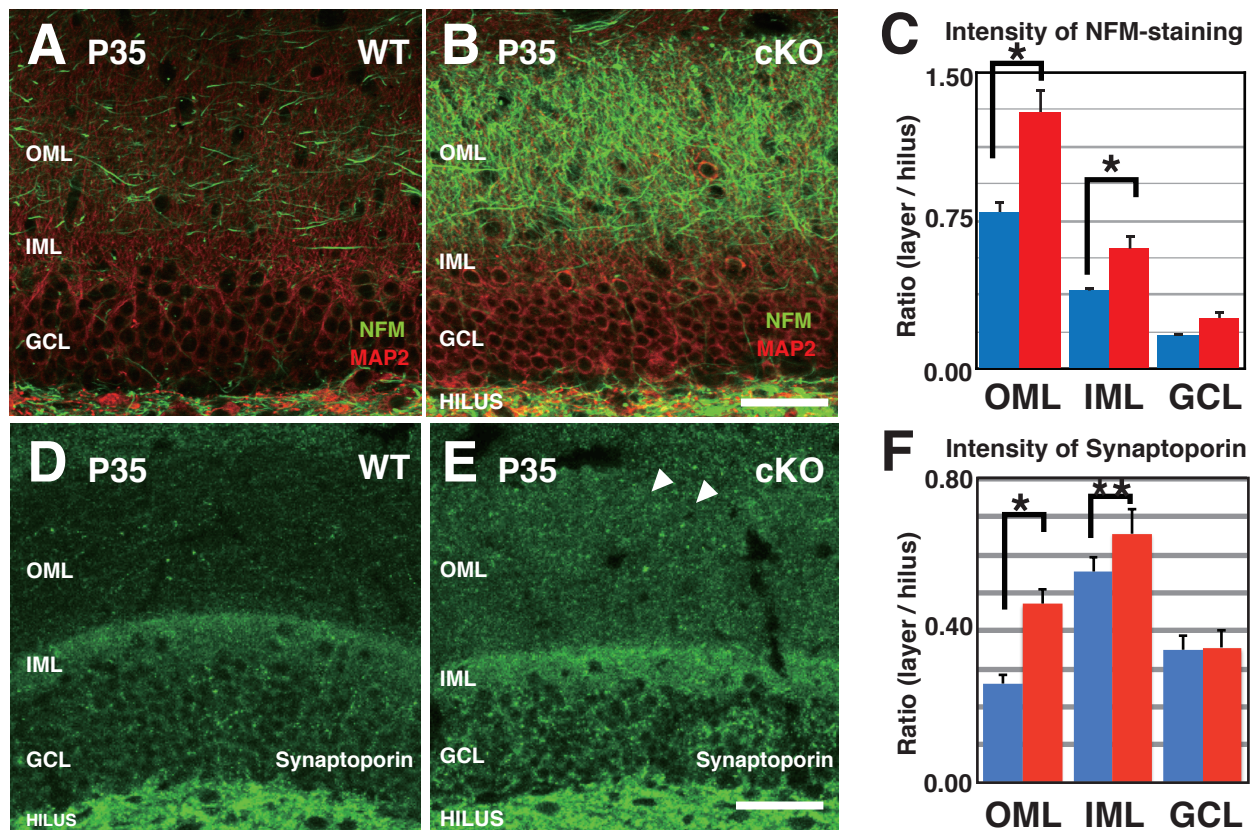

Supplement: supp [file elife-30935-supp-v1.zip]

## Figure 4-figure supplement 1

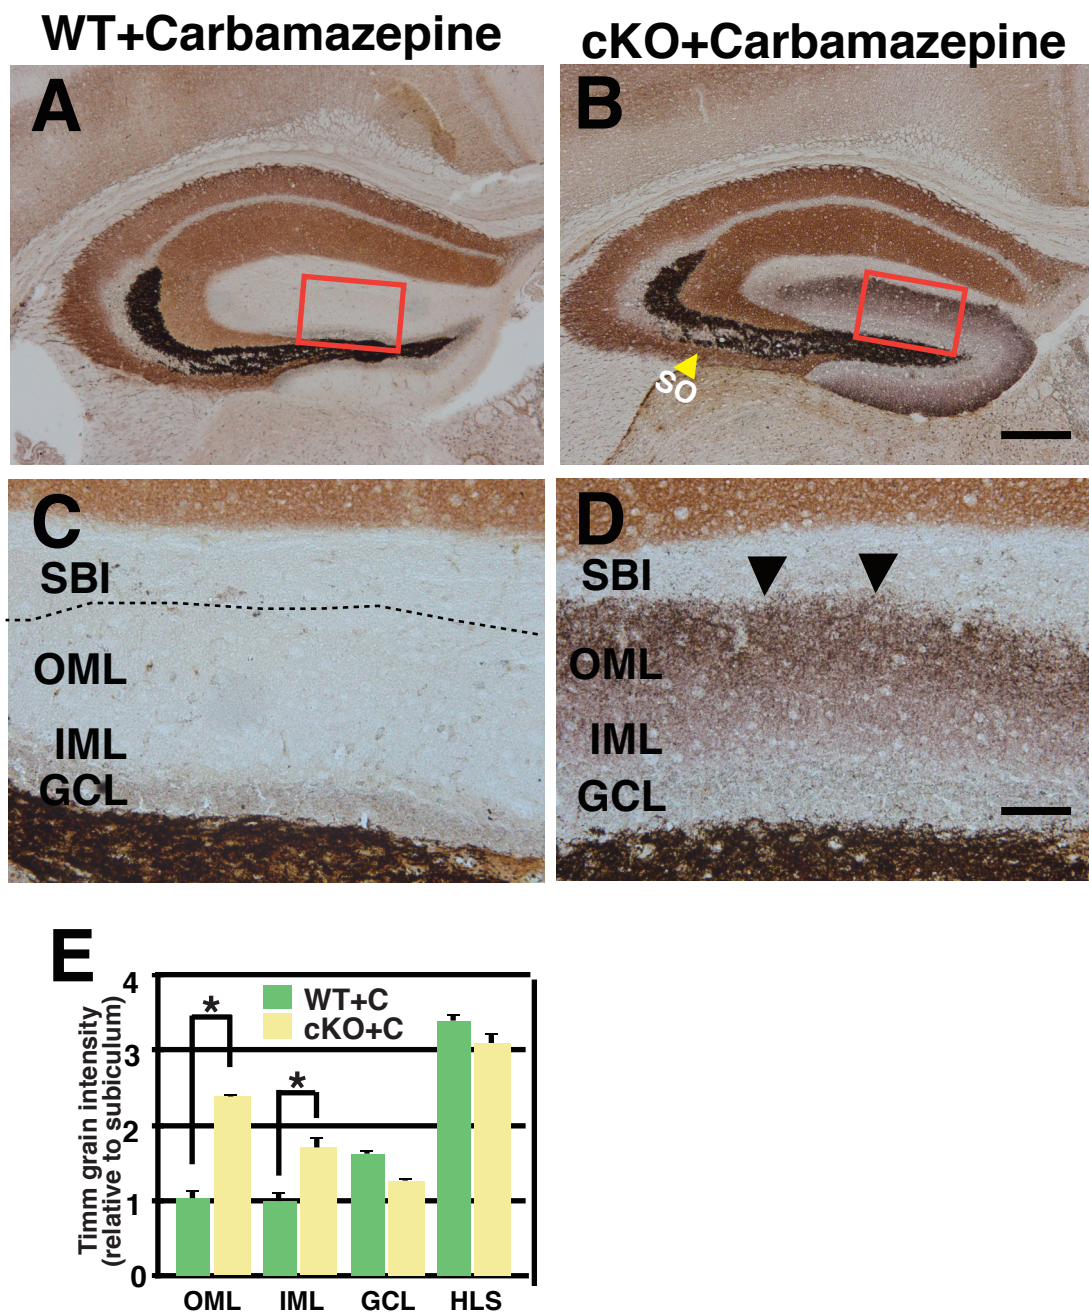

Supplement: supp [file elife-30935-supp-v1.zip]

## Figure 6-figure supplement 2

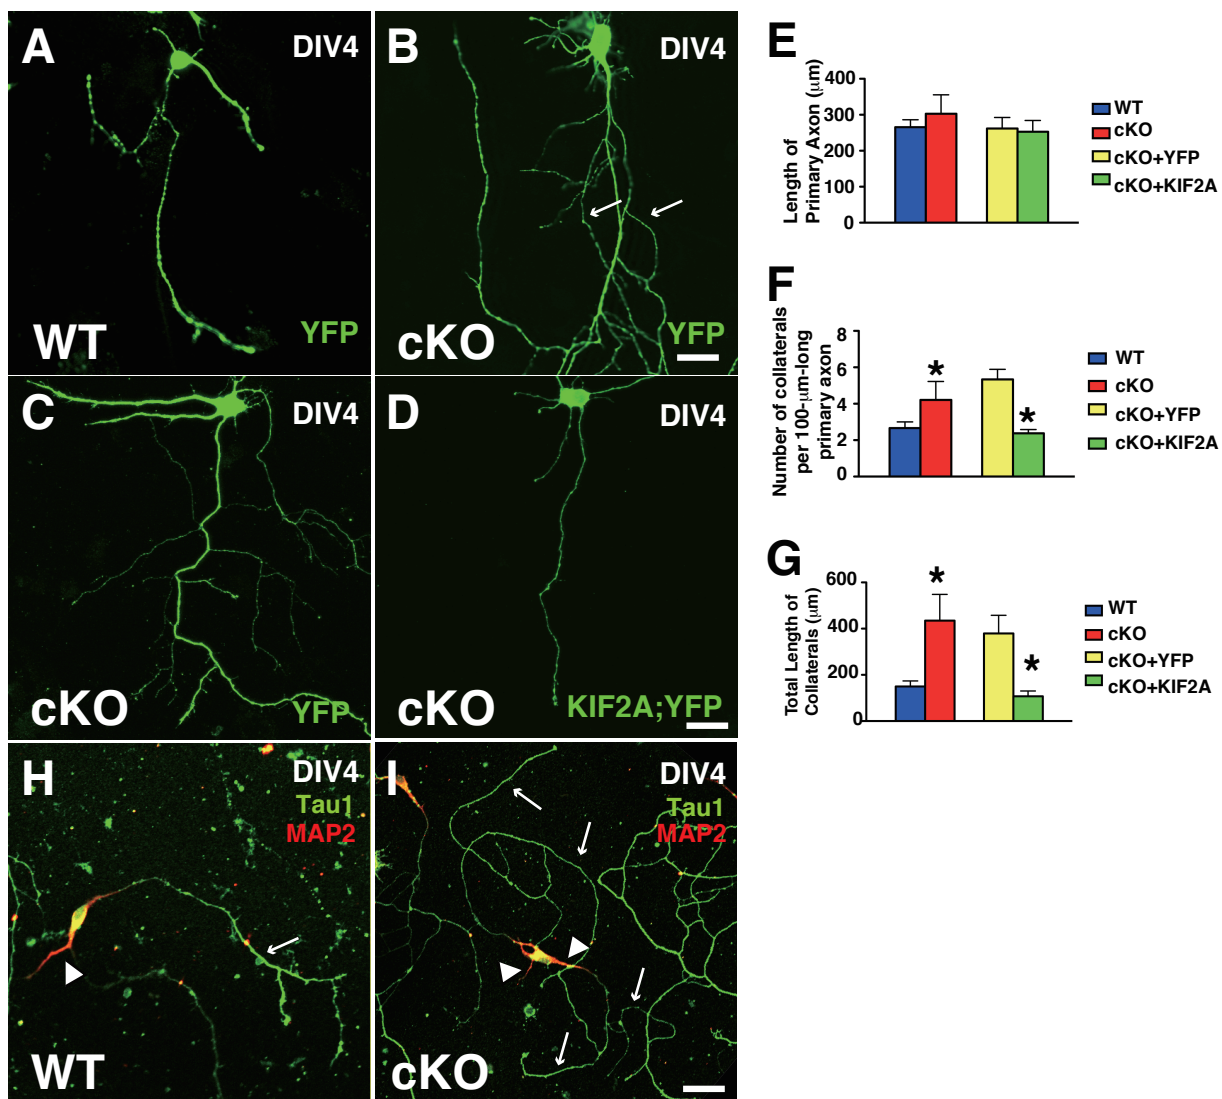

Supplement: supp [file elife-30935-supp-v1.zip]

# Figure 6-figure supplement 1

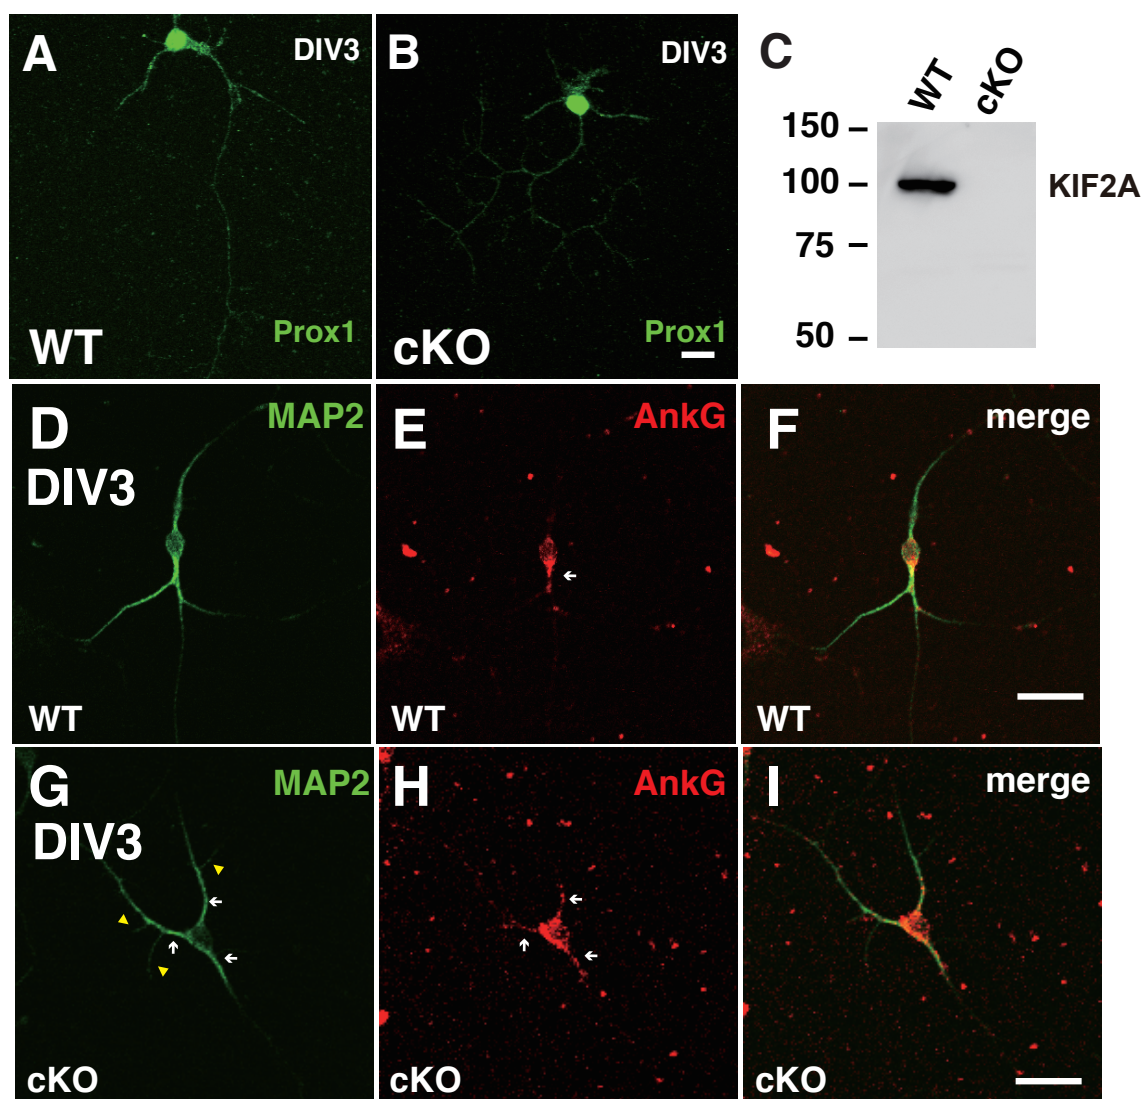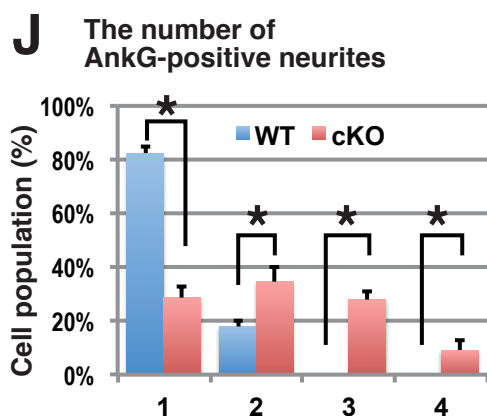

Supplement: supp [file elife-30935-supp-v1.zip]

# Figure 2-figure supplement 1

4w-Kif2a-cKO (at 12w)

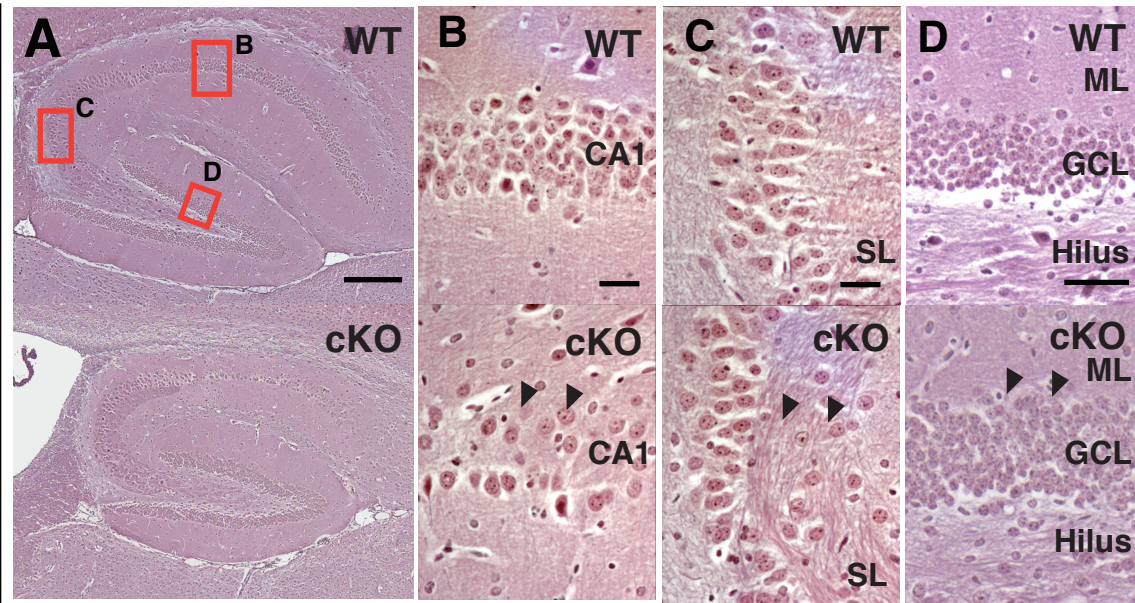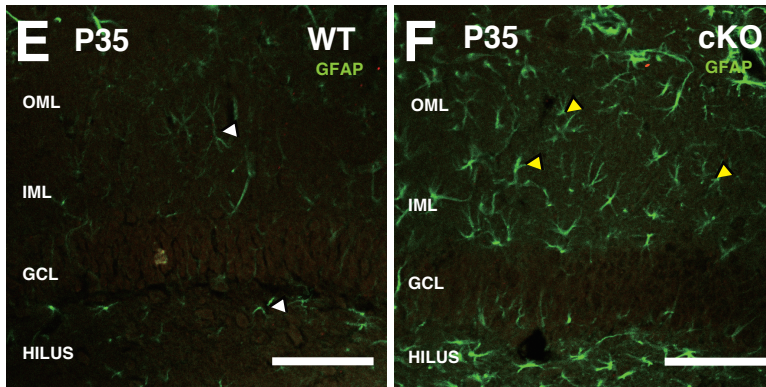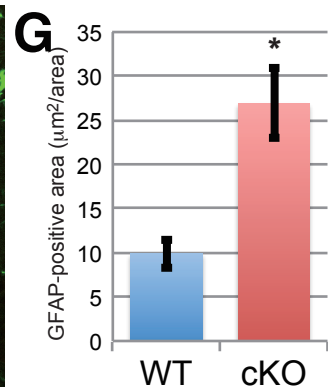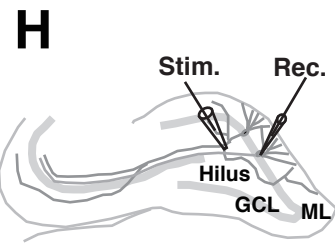

Supplement: supp [file elife-30935-supp-v1.zip]
